# Supplementary material for: Trends and predictors of biomedical research quality, 1990–2015: a meta-research study
Source: PubMed Central journal article supplement — BMJ Open. 2019 Sep 3;9(9):e030342. doi: 10.1136/bmjopen-2019-030342 (PMC6731820; doi:10.1136/bmjopen-2019-030342), 2019-09-03
Supplement: bmjopen-2019-030342supp001.pdf [file bmjopen-2019-030342supp001.pdf]

### **Supplementary Materials, Tables and Figures**

Table A1: Cochrane Risk of Bias Assessment Tool

Table A2: Main regression results predicting adequate methods, inadequate methods and poor reporting

Table A3: Regression results predicting relative risk ratios for each dimension

Appendix A: List of top 25 universities in clinical medicine and pharmacy

Appendix B: List of top pharmaceutical companies

Appendix C: List of included Cochrane reviews

**Table A1: Cochrane Risk of Bias Assessment Tool**

| <b>Bias domain</b> | <b>Source of bias</b>                  | <b>Support for judgement</b>                                                                                                                                                                                                                                                                                                                                                | <b>Review Authors judgement</b>                                                                                     |
|--------------------|----------------------------------------|-----------------------------------------------------------------------------------------------------------------------------------------------------------------------------------------------------------------------------------------------------------------------------------------------------------------------------------------------------------------------------|---------------------------------------------------------------------------------------------------------------------|
| Selection bias     | Random sequence generation             | Describe the method used to generate the allocation sequence in sufficient detail to allow an assessment of whether it should produce comparable groups.                                                                                                                                                                                                                    | Selection bias (biased allocation to intervention) due to inadequate generation of a randomized sequence.           |
| Selection bias     | Allocation concealment                 | Describe the method used to conceal the allocation sequence in sufficient detail to determine whether intervention allocations could have been foreseen before or during enrollment.                                                                                                                                                                                        | Selection bias (biased allocation to interventions) due to inadequate concealment of allocations before assignment. |
| Performance bias   | Blinding of participants and personnel | Describe all measures used, if any, to blind participants and researchers from knowledge of which intervention a participant received. Provide any information relating to whether the intended blinding was effective.                                                                                                                                                     | Performance bias due to knowledge of the allocated intervention by participants and personnel during the study.     |
| Detection bias     | Blinding of outcome assessment         | Describe all measures used, if any, to blind outcome assessment from knowledge of which intervention a participant received. Provide any information relating to whether the intended blinding was effective.                                                                                                                                                               | Performance bias due to knowledge of the allocated intervention by outcome assessment.                              |
| Attrition bias     | Incomplete outcome data                | Describe the completeness of outcome data for each main outcome, including attrition and exclusions from the analysis. State whether attritions and exclusions were reported, the numbers in each intervention group (compared with total randomized participants), reasons for attrition or exclusion where reported, and any re-inclusion in the analysis for the review. | Attrition bias due to amount, nature or handling of incomplete outcome data                                         |
| Reporting bias     | Selective reporting                    | State how selective outcome reporting was examined and what was found.                                                                                                                                                                                                                                                                                                      | Reporting bias due to selective outcome reporting.                                                                  |
| Other bias         | Anything else, pre-specified           | State any important concerns about bias not covered in other domains in the tool.                                                                                                                                                                                                                                                                                           | Bias due to problems not covered elsewhere.                                                                         |

Source: Adapted from Higgins et al, 2011

**Table A2: Main regression results predicting adequate methods, inadequate methods and poor reporting (Relative Risk Ratios)**

|                              | Inadequate Methods | Poor Reporting |
|------------------------------|--------------------|----------------|
| <b>Funding</b>               |                    |                |
| NIH Grant                    | 0.83               | 0.76           |
| Industry                     | 0.84*              | 0.85           |
| <b>Sector (First Author)</b> |                    |                |
| Top University               | 0.76               | 0.76           |
| Government                   | 1.21               | 1.05           |
| Hospital                     | 1.19               | 1.16           |
| Non-Profit                   | 1.40               | 1.27           |
| Top Pharma                   | 0.43**             | 0.74           |
| Other Firms                  | 1.38               | 1.06           |
| <b>Sector (Other Author)</b> |                    |                |
| Any Firm                     | 0.66               | 0.79           |
| <b>Study/Team</b>            |                    |                |
| Registered trial             | 0.42***            | 0.45***        |
| First Study                  | 0.90               | 0.80           |
| Second Study                 | 0.85               | 0.81           |
| Number of Authors            | 0.95***            | 0.97***        |
| International                | 0.51**             | 0.64*          |
| <b>Technology</b>            |                    |                |
| Drug                         | 0.50***            | 0.73*          |
| Device                       | 1.71**             | 1.23           |
| Procedure                    | 1.01               | 1.28           |
| Behavioral                   | 2.63***            | 1.44           |
| <b>Geography</b>             |                    |                |
| USA                          | 1.11               | 1.39*          |
| Canada                       | 0.71               | 0.81           |
| Europe                       | 1.29*              | 1.22           |
| UK                           | 1.06               | 0.91           |

\* p<0.05, \*\* p<0.01, \*\*\* p<0.001

This table presents main regression results (relative risk ratios and p-values) from estimating the multinomial logit model predicting overall RCT quality. The dependent variable is a categorical variable and can take three values: adequate methods, inadequate methods and poor reporting. Adequate methods is the reference outcome category. The regression sample includes 11,686 RCTs with accessible full-text. See Figure A1 for more detailed information about the sample. The relative risk ratios represent the likelihood of a RCT with specific funding, sector, study/team, technology and country characteristics using inadequate methods (or being poorly reported), as compared to the likelihood of a RCT in a reference group without these characteristics using inadequate methods (or being poorly reported). In the regression, sector, technology and country are categorical variables. The omitted category for sector is other university. The omitted category for technology is other interventions. The omitted category for country is other countries. The regression includes topic and year fixed effects. These results are plotted in Figure 3. Other regression results predicting relative risk ratios for high or unclear risk of bias on each dimension assessed (as opposed to overall quality) are reported in Table A3.

Table A3: Regression results predicting relative risk ratios for each dimension

|                              | Random Sequence |         | Allocation Conceal. |         | Blinding PP |         | Blinding OA |         | Incomplete Data |         | Selective Reporting |         |
|------------------------------|-----------------|---------|---------------------|---------|-------------|---------|-------------|---------|-----------------|---------|---------------------|---------|
|                              | High            | Unclear | High                | Unclear | High        | Unclear | High        | Unclear | High            | Unclear | High                | Unclear |
| <b>Funding</b>               |                 |         |                     |         |             |         |             |         |                 |         |                     |         |
| NIH Grant                    | 0.29***         | 0.90    | 0.51***             | 0.93    | 1.12        | 1.06    | 1.01        | 0.93    | 1.03            | 1.04    | 1.03                | 0.99    |
| Industry                     | 1.03            | 1.07    | 1.18                | 1.06    | 0.87*       | 0.92    | 0.98        | 0.98    | 0.97            | 0.99    | 1.06                | 1.04    |
| <b>Sector (First Author)</b> |                 |         |                     |         |             |         |             |         |                 |         |                     |         |
| Top University               | 0.99            | 0.96    | 0.91                | 0.88    | 0.85        | 0.83    | 0.84        | 0.85    | 0.90            | 1.05    | 1.19                | 1.08    |
| Government                   | 0.91            | 1.01    | 0.85                | 0.98    | 1.00        | 0.96    | 1.00        | 0.92    | 1.29**          | 1.14    | 1.15                | 1.12    |
| Hospital                     | 1.07            | 1.06    | 1.05                | 1.00    | 1.08        | 0.96    | 1.12        | 1.04    | 1.05            | 0.95    | 0.89                | 1.03    |
| Non-Profit                   | 1.40            | 1.05    | 1.34                | 0.91    | 1.08        | 1.02    | 1.13        | 0.99    | 1.01            | 1.03    | 1.03                | 1.07    |
| Top Pharma                   | 0.49            | 0.96    | 0.60                | 0.83    | 0.34***     | 0.73    | 0.56*       | 0.74    | 0.86            | 0.61    | 0.70                | 0.59*   |
| Other Firms                  | 2.19            | 1.64*   | 2.01                | 1.60*   | 0.64        | 0.94    | 0.56        | 1.41    | 1.30            | 1.12    | 2.16*               | 1.05    |
| <b>Sector (Other Author)</b> |                 |         |                     |         |             |         |             |         |                 |         |                     |         |
| Any Firm                     | 0.18**          | 0.92    | 0.53                | 1.04    | 0.65**      | 0.94    | 0.86        | 1.21    | 1.39*           | 1.06    | 0.94                | 1.02    |
| <b>Study/Team</b>            |                 |         |                     |         |             |         |             |         |                 |         |                     |         |
| Registered trial             | 0.31***         | 0.42*** | 0.39***             | 0.41*** | 0.72***     | 0.60*** | 0.58***     | 0.63*** | 0.67***         | 0.71*** | 0.66***             | 0.52*** |
| First Study                  | 0.95            | 0.81**  | 1.09                | 0.84*   | 1.15        | 1.07    | 1.02        | 0.85    | 0.97            | 0.90    | 1.14                | 1.03    |
| Second Study                 | 1.00            | 0.83*   | 1.01                | 0.80**  | 1.02        | 1.03    | 1.04        | 1.01    | 0.87            | 0.88    | 1.06                | 1.01    |
| Number of Authors            | 0.92***         | 0.97*** | 0.93***             | 0.95*** | 0.98**      | 0.96*** | 0.95***     | 0.97*** | 0.98*           | 0.99    | 0.99                | 0.96*** |
| International                | 0.88            | 0.79*   | 0.53*               | 0.74**  | 0.79        | 0.94    | 0.73*       | 0.75*   | 0.91            | 0.86    | 0.66*               | 0.82    |
| <b>Technology</b>            |                 |         |                     |         |             |         |             |         |                 |         |                     |         |
| Drug                         | 0.66*           | 1.14    | 0.76                | 1.11    | 0.41***     | 0.48*** | 0.82        | 0.87    | 0.92            | 0.94    | 1.00                | 1.05    |
| Device                       | 1.31            | 1.02    | 1.34                | 1.10    | 1.52**      | 0.93    | 1.27        | 0.93    | 0.91            | 1.02    | 1.02                | 0.83    |
| Procedure                    | 0.90            | 1.21**  | 0.93                | 1.22*   | 0.91        | 1.24    | 1.18        | 1.22    | 0.85            | 1.06    | 1.06                | 1.13    |
| Behavioral                   | 0.88            | 1.03    | 1.21                | 1.16    | 2.83***     | 1.53**  | 2.09***     | 1.27    | 1.34**          | 1.18    | 0.89                | 1.41*   |
| <b>Geography</b>             |                 |         |                     |         |             |         |             |         |                 |         |                     |         |
| USA                          | 1.04            | 1.15    | 0.93                | 1.12    | 0.73***     | 0.95    | 0.81        | 1.02    | 1.23*           | 1.22*   | 0.96                | 0.93    |
| Canada                       | 0.55            | 0.69**  | 0.69                | 0.61*** | 0.75        | 0.75    | 0.85        | 0.66**  | 0.94            | 1.09    | 0.76                | 0.88    |
| Europe                       | 0.80            | 1.05    | 0.79                | 0.96    | 1.13        | 1.05    | 1.29**      | 1.09    | 1.13            | 0.97    | 1.01                | 0.92    |
| UK                           | 0.89            | 0.89    | 0.65**              | 0.67*** | 1.03        | 0.87    | 1.11        | 0.96    | 1.04            | 1.01    | 1.07                | 0.86    |

\*p&lt;0.05, \*\*p&lt;0.01, \*\*\*p&lt;0.001

---

This table presents main regression results (relative risk ratios and p-values) from estimating the multinomial logit model predicting risk of bias for each dimension assessed. The dependent variable is a categorical variable and can take three values: low risk, high risk or unclear risk. Low risk is the reference outcome category. The regression sample includes 11,686 RCTs with accessible full-text. See Figure A1 for more detailed information about the sample. The relative risk ratios represent the likelihood of a RCT with specific funding, sector, study/team, technology and country characteristics being assessed at high risk (or unclear risk) as compared to the likelihood of a RCT in a reference group without these characteristics being assessed at high risk (or unclear risk). In the regression, sector, technology and country are categorical variables. The omitted category for sector is other university. The omitted category for technology is other interventions. The omitted category for country is other countries. The regression includes topic and year fixed effects. Other regression results predicting relative risk ratios for overall quality (as opposed to relative risk ratios for high or unclear risk of bias on each dimension assessed) are reported in Table A2.

**Appendix A: List of top 25 universities in clinical medicine and pharmacy (AWRU, 2007)**

- Harvard University
- University of California, San Francisco
- University of Washington
- The Johns Hopkins University
- Columbia University
- University of California, Los Angeles
- The University of Texas Southwestern Medical Center at Dallas
- University of Michigan - Ann Arbor
- Karolinska Institute
- University of Pittsburgh
- Stanford University
- Mayo Medical School
- University of Oxford
- University of Minnesota, Twin Cities
- University of Cambridge
- Yale University
- University College London
- The University of Texas M. D. Anderson Cancer Center
- University of Wisconsin - Madison
- Vanderbilt University
- University of Pennsylvania
- Duke University
- University of California, San Diego
- Tufts University
- The Imperial College of Science, Technology and Medicine

**Appendix B: List of top pharmaceutical companies used in this study (by revenue)**

- Johnson & Johnson
- Roche
- Pfizer
- Novartis
- Bayer
- Merck & Co
- GlaxoSmithKline
- Sanofi
- Abbvie
- Abbott Laboratories
- Eli Lilly & Co
- Amgen
- Bristol-Myers Squibb
- Gilead Sciences
- AstraZeneca
- Teva Pharmaceutical Industries
- Boehringer Ingelheim
- Merck Group
- Novo Nordisk
- Takeda Pharmaceutical
- Allergan plc
- Shire
- Celgene
- Biogen

**Appendix C: List of included Cochrane reviews (DOIs)**

10.1002/14651858.CD007585.pub4  
10.1002/14651858.CD009667.pub2  
10.1002/14651858.CD003626.pub2  
10.1002/14651858.CD006882.pub2  
10.1002/14651858.CD008258.pub2  
10.1002/14651858.CD007712.pub2  
10.1002/14651858.CD003623.pub3  
10.1002/14651858.CD007749.pub2  
10.1002/14651858.CD008960.pub2  
10.1002/14651858.CD004787.pub2  
10.1002/14651858.CD002800.pub3  
10.1002/14651858.CD006933.pub2  
10.1002/14651858.CD006006.pub2  
10.1002/14651858.CD003619.pub3  
10.1002/14651858.CD009052.pub2  
10.1002/14651858.CD006002.pub2  
10.1002/14651858.CD009144.pub2  
10.1002/14651858.CD007864.pub2  
10.1002/14651858.CD006224.pub3  
10.1002/14651858.CD007506.pub3  
10.1002/14651858.CD007677.pub3  
10.1002/14651858.CD008565.pub2  
10.1002/14651858.CD005354.pub2  
10.1002/14651858.CD006586.pub4  
10.1002/14651858.CD008995.pub2  
10.1002/14651858.CD003415.pub4  
10.1002/14651858.CD002122.pub2  
10.1002/14651858.CD004993.pub3  
10.1002/14651858.CD008585.pub2  
10.1002/14651858.CD006568.pub3  
10.1002/14651858.CD003053.pub5  
10.1002/14651858.CD006768.pub2  
10.1002/14651858.CD002221.pub2  
10.1002/14651858.CD008228.pub2  
10.1002/14651858.CD001860.pub3  
10.1002/14651858.CD007842.pub2  
10.1002/14651858.CD007685.pub2  
10.1002/14651858.CD007630.pub2  
10.1002/14651858.CD004003.pub4  
10.1002/14651858.CD006746.pub3



10.1002/14651858.CD004239.pub3  
10.1002/14651858.CD007293.pub3  
10.1002/14651858.CD005137.pub3  
10.1002/14651858.CD004916.pub3  
10.1002/14651858.CD004567.pub2  
10.1002/14651858.CD005996.pub3  
10.1002/14651858.CD001122.pub4  
10.1002/14651858.CD008950.pub2  
10.1002/14651858.CD007687.pub2  
10.1002/14651858.CD005556.pub2  
10.1002/14651858.CD005287.pub4  
10.1002/14651858.CD007244.pub2  
10.1002/14651858.CD000479.pub5  
10.1002/14651858.CD003857.pub3  
10.1002/14651858.CD000402.pub4  
10.1002/14651858.CD001894.pub5  
10.1002/14651858.CD002808.pub3  
10.1002/14651858.CD008528.pub2  
10.1002/14651858.CD004829.pub3  
10.1002/14651858.CD005072.pub3  
10.1002/14651858.CD008994.pub2  
10.1002/14651858.CD000400.pub3  
10.1002/14651858.CD008088.pub3  
10.1002/14651858.CD010042.pub2  
10.1002/14651858.CD008575.pub2  
10.1002/14651858.CD009391.pub2  
10.1002/14651858.CD005292.pub3  
10.1002/14651858.CD009672.pub2  
10.1002/14651858.CD010167.pub2  
10.1002/14651858.CD001396.pub3  
10.1002/14651858.CD009452.pub2  
10.1002/14651858.CD005071.pub4  
10.1002/14651858.CD003416.pub4  
10.1002/14651858.CD006920.pub3  
10.1002/14651858.CD007410.pub2  
10.1002/14651858.CD010550.pub2  
10.1002/14651858.CD009505.pub2  
10.1002/14651858.CD001502.pub4  
10.1002/14651858.CD001501.pub4  
10.1002/14651858.CD000329.pub2  
10.1002/14651858.CD010241.pub2  
10.1002/14651858.CD006900.pub3  
10.1002/14651858.CD003433.pub3

10.1002/14651858.CD007114.pub2  
10.1002/14651858.CD003658.pub3  
10.1002/14651858.CD002219.pub2  
10.1002/14651858.CD010287.pub2  
10.1002/14651858.CD007421.pub3  
10.1002/14651858.CD001395.pub4  
10.1002/14651858.CD001861.pub3  
10.1002/14651858.CD004399.pub3  
10.1002/14651858.CD006769.pub2  
10.1002/14651858.CD001775.pub2  
10.1002/14651858.CD009379.pub2  
10.1002/14651858.CD001211.pub3  
10.1002/14651858.CD005022.pub3  
10.1002/14651858.CD009078.pub2  
10.1002/14651858.CD009510.pub2  
10.1002/14651858.CD006421.pub3  
10.1002/14651858.CD005135.pub3  
10.1002/14651858.CD006030.pub3  
10.1002/14651858.CD003737.pub3  
10.1002/14651858.CD009306.pub2  
10.1002/14651858.CD006032.pub4  
10.1002/14651858.CD006132.pub3  
10.1002/14651858.CD008813.pub2  
10.1002/14651858.CD008428.pub2  
10.1002/14651858.CD003303.pub3  
10.1002/14651858.CD008797.pub2  
10.1002/14651858.CD005431.pub3  
10.1002/14651858.CD008812.pub2  
10.1002/14651858.CD008420.pub3  
10.1002/14651858.CD006126.pub3  
10.1002/14651858.CD007059.pub2  
10.1002/14651858.CD007284.pub2  
10.1002/14651858.CD001132.pub2  
10.1002/14651858.CD006122.pub3  
10.1002/14651858.CD004122.pub4  
10.1002/14651858.CD009490  
10.1002/14651858.CD008762.pub2  
10.1002/14651858.CD003861.pub3  
10.1002/14651858.CD001733.pub3  
10.1002/14651858.CD001737.pub4  
10.1002/14651858.CD008058.pub2  
10.1002/14651858.CD001177.pub3  
10.1002/14651858.CD004983.pub3

10.1002/14651858.CD002302.pub2  
10.1002/14651858.CD000265.pub3  
10.1002/14651858.CD002106.pub4  
10.1002/14651858.CD006477.pub2  
10.1002/14651858.CD009907.pub2  
10.1002/14651858.CD010424.pub2  
10.1002/14651858.CD009111.pub3  
10.1002/14651858.CD009101.pub3  
10.1002/14651858.CD009110.pub3  
10.1002/14651858.CD009099.pub3  
10.1002/14651858.CD006810.pub3  
10.1002/14651858.CD009362.pub2  
10.1002/14651858.CD008738.pub2  
10.1002/14651858.CD009726.pub2  
10.1002/14651858.CD006214.pub4  
10.1002/14651858.CD010268.pub2  
10.1002/14651858.CD003826.pub3  
10.1002/14651858.CD003588.pub3  
10.1002/14651858.CD006823.pub2  
10.1002/14651858.CD006665.pub3  
10.1002/14651858.CD010318.pub2  
10.1002/14651858.CD006354.pub4  
10.1002/14651858.CD005571.pub3  
10.1002/14651858.CD010427.pub2  
10.1002/14651858.CD004551.pub3  
10.1002/14651858.CD005570.pub4  
10.1002/14651858.CD004549.pub3  
10.1002/14651858.CD008059.pub3  
10.1002/14651858.CD010425.pub2  
10.1002/14651858.CD006471.pub3  
10.1002/14651858.CD005485.pub3  
10.1002/14651858.CD010365.pub2  
10.1002/14651858.CD009958.pub2  
10.1002/14651858.CD005360.pub4  
10.1002/14651858.CD003557.pub5  
10.1002/14651858.CD001899.pub4  
10.1002/14651858.CD003948.pub3  
10.1002/14651858.CD008805.pub3  
10.1002/14651858.CD009697.pub2  
10.1002/14651858.CD003325.pub3  
10.1002/14651858.CD003216.pub2  
10.1002/14651858.CD009224.pub2  
10.1002/14651858.CD001273.pub3

10.1002/14651858.CD002303.pub3  
10.1002/14651858.CD008990.pub3  
10.1002/14651858.CD009261.pub3  
10.1002/14651858.CD006215.pub4  
10.1002/14651858.CD008394.pub3  
10.1002/14651858.CD001488.pub5  
10.1002/14651858.CD010266.pub2  
10.1002/14651858.CD004287.pub4  
10.1002/14651858.CD007174.pub2  
10.1002/14651858.CD011226.pub2  
10.1002/14651858.CD004985.pub5  
10.1002/14651858.CD006353.pub4  
10.1002/14651858.CD003949.pub4  
10.1002/14651858.CD011334.pub2  
10.1002/14651858.CD011278.pub2  
10.1002/14651858.CD011277.pub2  
10.1002/14651858.CD005083.pub4  
10.1002/14651858.CD011070.pub2  
10.1002/14651858.CD001836.pub3  
10.1002/14651858.CD002933.pub6  
10.1002/14651858.CD004123.pub4  
10.1002/14651858.CD011354.pub2  
10.1002/14651858.CD010075.pub3  
10.1002/14651858.CD010182.pub3  
10.1002/14651858.CD002930.pub6  
10.1002/14651858.CD007610.pub3  
10.1002/14651858.CD010259.pub3  
10.1002/14651858.CD001735.pub5  
10.1002/14651858.CD010367.pub2  
10.1002/14651858.CD007258.pub3  
10.1002/14651858.CD008474.pub2  
10.1002/14651858.CD008599.pub2  
10.1002/14651858.CD009061.pub2  
10.1002/14651858.CD010577.pub2  
10.1002/14651858.CD008548.pub2  
10.1002/14651858.CD008056.pub3  
10.1002/14651858.CD010764.pub2  
10.1002/14651858.CD009213.pub2  
10.1002/14651858.CD009432.pub2  
10.1002/14651858.CD004288.pub3  
10.1002/14651858.CD011712.pub2  
10.1002/14651858.CD002929.pub3  
10.1002/14651858.CD008062.pub4

10.1002/14651858.CD011586.pub2  
10.1002/14651858.CD008378.pub3  
10.1002/14651858.CD010694.pub2  
10.1002/14651858.CD006899.pub3  
10.1002/14651858.CD010140.pub2  
10.1002/14651858.CD011193.pub2  
10.1002/14651858.CD011111.pub2  
10.1002/14651858.CD011426.pub2  
10.1002/14651858.CD011923.pub2  
10.1002/14651858.CD008251.pub2  
10.1002/14651858.CD003091.pub4  
10.1002/14651858.CD011375.pub2  
10.1002/14651858.CD001180.pub4  
10.1002/14651858.CD005987.pub3  
10.1002/14651858.CD011038.pub2  
10.1002/14651858.CD011979.pub2  
10.1002/14651858.CD011609.pub2  
10.1002/14651858.CD011947.pub2  
10.1002/14651858.CD001333.pub4  
10.1002/14651858.CD005191.pub3  
10.1002/14651858.CD009308  
10.1002/14651858.CD008063.pub2  
10.1002/14651858.CD005031.pub4  
10.1002/14651858.CD009307  
10.1002/14651858.CD009113  
10.1002/14651858.CD004147.pub4  
10.1002/14651858.CD003410.pub4  
10.1002/14651858.CD004145.pub4  
10.1002/14651858.CD007381.pub2  
10.1002/14651858.CD009879.pub2  
10.1002/14651858.CD007775.pub2  
10.1002/14651858.CD003409.pub4  
10.1002/14651858.CD008358.pub2  
10.1002/14651858.CD009287.pub2  
10.1002/14651858.CD002950.pub3  
10.1002/14651858.CD006318.pub3  
10.1002/14651858.CD009695.pub2  
10.1002/14651858.CD006749.pub3  
10.1002/14651858.CD002207.pub4  
10.1002/14651858.CD007210.pub3  
10.1002/14651858.CD010704.pub2  
10.1002/14651858.CD008544.pub2  
10.1002/14651858.CD009269.pub3

10.1002/14651858.CD003020.pub3  
10.1002/14651858.CD008940.pub2  
10.1002/14651858.CD006037.pub3  
10.1002/14651858.CD006754.pub4  
10.1002/14651858.CD009652.pub2  
10.1002/14651858.CD003352.pub4  
10.1002/14651858.CD010910.pub2  
10.1002/14651858.CD010862.pub2  
10.1002/14651858.CD008969.pub3  
10.1002/14651858.CD006306.pub3  
10.1002/14651858.CD010901.pub2  
10.1002/14651858.CD006748.pub4  
10.1002/14651858.CD002024.pub5  
10.1002/14651858.CD011117.pub2  
10.1002/14651858.CD011983.pub2  
10.1002/14651858.CD005336.pub4  
10.1002/14651858.CD007380.pub4  
10.1002/14651858.CD007025.pub4  
10.1002/14651858.CD008502.pub5  
10.1002/14651858.CD002021.pub4  
10.1002/14651858.CD002025.pub5  
10.1002/14651858.CD011866.pub2  
10.1002/14651858.CD011479.pub2  
10.1002/14651858.CD009146.pub2  
10.1002/14651858.CD004887.pub3  
10.1002/14651858.CD008264.pub2  
10.1002/14651858.CD009145.pub2  
10.1002/14651858.CD007338.pub3  
10.1002/14651858.CD007512.pub2  
10.1002/14651858.CD004544.pub2  
10.1002/14651858.CD008714.pub2  
10.1002/14651858.CD009051.pub2  
10.1002/14651858.CD002799.pub2  
10.1002/14651858.CD007605.pub2  
10.1002/14651858.CD005444.pub3  
10.1002/14651858.CD006578.pub3  
10.1002/14651858.CD008516.pub2  
10.1002/14651858.CD008344.pub2  
10.1002/14651858.CD009498.pub3  
10.1002/14651858.CD000551.pub3  
10.1002/14651858.CD009004.pub2  
10.1002/14651858.CD008717.pub2  
10.1002/14651858.CD009497.pub2

10.1002/14651858.CD009058.pub2  
10.1002/14651858.CD003617.pub2  
10.1002/14651858.CD005640.pub3  
10.1002/14651858.CD005641.pub3  
10.1002/14651858.CD007176.pub2  
10.1002/14651858.CD007196.pub3  
10.1002/14651858.CD005440.pub3  
10.1002/14651858.CD004547.pub2  
10.1002/14651858.CD006798.pub4  
10.1002/14651858.CD007088.pub2  
10.1002/14651858.CD006575.pub3  
10.1002/14651858.CD010163.pub2  
10.1002/14651858.CD006004.pub4  
10.1002/14651858.CD006574.pub4  
10.1002/14651858.CD006573.pub3  
10.1002/14651858.CD006804.pub3  
10.1002/14651858.CD009059.pub2  
10.1002/14651858.CD006803.pub4  
10.1002/14651858.CD008623.pub2  
10.1002/14651858.CD003327.pub4  
10.1002/14651858.CD010479.pub2  
10.1002/14651858.CD003046.pub3  
10.1002/14651858.CD003047.pub3  
10.1002/14651858.CD007109.pub2  
10.1002/14651858.CD005642.pub3  
10.1002/14651858.CD009933.pub2  
10.1002/14651858.CD005441.pub3  
10.1002/14651858.CD010478.pub2  
10.1002/14651858.CD006660.pub3  
10.1002/14651858.CD007049.pub2  
10.1002/14651858.CD006930.pub3  
10.1002/14651858.CD009060.pub2  
10.1002/14651858.CD007337.pub3  
10.1002/14651858.CD008261.pub2  
10.1002/14651858.CD009182.pub2  
10.1002/14651858.CD011132.pub2  
10.1002/14651858.CD010252.pub2  
10.1002/14651858.CD010125.pub2  
10.1002/14651858.CD006745.pub3  
10.1002/14651858.CD010253.pub2  
10.1002/14651858.CD010164.pub2  
10.1002/14651858.CD011313.pub2  
10.1002/14651858.CD010180.pub2

10.1002/14651858.CD007606.pub3  
10.1002/14651858.CD006390.pub2  
10.1002/14651858.CD003044.pub4  
10.1002/14651858.CD008545.pub2  
10.1002/14651858.CD011314.pub2  
10.1002/14651858.CD011647.pub2  
10.1002/14651858.CD011649.pub2  
10.1002/14651858.CD011644.pub2  
10.1002/14651858.CD008716.pub3  
10.1002/14651858.CD011650.pub2  
10.1002/14651858.CD010683.pub3  
10.1002/14651858.CD011645.pub2  
10.1002/14651858.CD011343.pub2  
10.1002/14651858.CD001939.pub4  
10.1002/14651858.CD011640.pub2  
10.1002/14651858.CD011648.pub2  
10.1002/14651858.CD011646.pub2  
10.1002/14651858.CD011639.pub2  
10.1002/14651858.CD002798.pub4  
10.1002/14651858.CD005162.pub4  
10.1002/14651858.CD011598.pub2  
10.1002/14651858.CD008586.pub2  
10.1002/14651858.CD007302.pub2  
10.1002/14651858.CD002217.pub2  
10.1002/14651858.CD009429.pub2  
10.1002/14651858.CD003277.pub3  
10.1002/14651858.CD002750.pub2  
10.1002/14651858.CD003615.pub3  
10.1002/14651858.CD001901.pub2  
10.1002/14651858.CD009945.pub2  
10.1002/14651858.CD005398.pub3  
10.1002/14651858.CD001415.pub2  
10.1002/14651858.CD001416.pub3  
10.1002/14651858.CD001908.pub3  
10.1002/14651858.CD001417.pub3  
10.1002/14651858.CD001770.pub3  
10.1002/14651858.CD006370.pub2  
10.1002/14651858.CD009270.pub3  
10.1002/14651858.CD005612.pub3  
10.1002/14651858.CD009258.pub2  
10.1002/14651858.CD006779.pub2  
10.1002/14651858.CD010062.pub2  
10.1002/14651858.CD003723.pub3



10.1002/14651858.CD005062.pub4  
10.1002/14651858.CD010682.pub2  
10.1002/14651858.CD010236.pub2  
10.1002/14651858.CD001902.pub2  
10.1002/14651858.CD007286.pub3  
10.1002/14651858.CD008841.pub2  
10.1002/14651858.CD005222.pub3  
10.1002/14651858.CD002896.pub2  
10.1002/14651858.CD011311.pub2  
10.1002/14651858.CD009472.pub3  
10.1002/14651858.CD009887.pub3  
10.1002/14651858.CD009027.pub2  
10.1002/14651858.CD005502.pub3  
10.1002/14651858.CD005399.pub3  
10.1002/14651858.CD009900.pub2  
10.1002/14651858.CD006118.pub3  
10.1002/14651858.CD009324.pub3  
10.1002/14651858.CD006245.pub3  
10.1002/14651858.CD001903.pub3  
10.1002/14651858.CD006244.pub3  
10.1002/14651858.CD008781.pub3  
10.1002/14651858.CD007144.pub2  
10.1002/14651858.CD001769.pub3  
10.1002/14651858.CD001909.pub2  
10.1002/14651858.CD011792.pub2  
10.1002/14651858.CD006967.pub4  
10.1002/14651858.CD011014.pub2  
10.1002/14651858.CD011025.pub2  
10.1002/14651858.CD011922.pub2  
10.1002/14651858.CD001031.pub3  
10.1002/14651858.CD007124.pub5  
10.1002/14651858.CD012065.pub2  
10.1002/14651858.CD009202.pub4  
10.1002/14651858.CD003032.pub3  
10.1002/14651858.CD001904.pub3  
10.1002/14651858.CD008312.pub3  
10.1002/14651858.CD010224.pub2  
10.1002/14651858.CD010008.pub3  
10.1002/14651858.CD010483.pub4  
10.1002/14651858.CD003031.pub3  
10.1002/14651858.CD001911.pub3  
10.1002/14651858.CD008557.pub3  
10.1002/14651858.CD008295.pub4

10.1002/14651858.CD001524.pub3  
10.1002/14651858.CD008497.pub3  
10.1002/14651858.CD011412.pub2  
10.1002/14651858.CD007679.pub4  
10.1002/14651858.CD006461.pub4  
10.1002/14651858.CD007738.pub2  
10.1002/14651858.CD009700.pub2  
10.1002/14651858.CD007325.pub3  
10.1002/14651858.CD005139.pub3  
10.1002/14651858.CD011230.pub2  
10.1002/14651858.CD008811.pub3  
10.1002/14651858.CD005430.pub3  
10.1002/14651858.CD008721.pub2  
10.1002/14651858.CD011234.pub2  
10.1002/14651858.CD008213.pub2  
10.1002/14651858.CD003659.pub4  
10.1002/14651858.CD010792.pub2  
10.1002/14651858.CD001538.pub4  
10.1002/14651858.CD010621.pub2  
10.1002/14651858.CD006127.pub2  
10.1002/14651858.CD010015.pub3  
10.1002/14651858.CD008350.pub2  
10.1002/14651858.CD004241.pub4  
10.1002/14651858.CD009080.pub2  
10.1002/14651858.CD008732.pub2  
10.1002/14651858.CD002898.pub5  
10.1002/14651858.CD009566.pub2  
10.1002/14651858.CD003434.pub3  
10.1002/14651858.CD008671.pub3  
10.1002/14651858.CD001430.pub4  
10.1002/14651858.CD007603.pub2  
10.1002/14651858.CD008214.pub3  
10.1002/14651858.CD007324.pub3  
10.1002/14651858.CD004242.pub5  
10.1002/14651858.CD006537.pub3  
10.1002/14651858.CD010868.pub2  
10.1002/14651858.CD006259.pub2  
10.1002/14651858.CD009380.pub2  
10.1002/14651858.CD004008.pub3  
10.1002/14651858.CD010472.pub2  
10.1002/14651858.CD011346.pub2  
10.1002/14651858.CD011146.pub2  
10.1002/14651858.CD009782.pub2

10.1002/14651858.CD010469.pub2  
10.1002/14651858.CD005655.pub2  
10.1002/14651858.CD011349.pub2  
10.1002/14651858.CD009799.pub2  
10.1002/14651858.CD002218.pub2  
10.1002/14651858.CD011841.pub2  
10.1002/14651858.CD010735.pub2  
10.1002/14651858.CD004764.pub3  
10.1002/14651858.CD006927.pub5  
10.1002/14651858.CD009729.pub2  
10.1002/14651858.CD011503.pub2  
10.1002/14651858.CD010293.pub2  
10.1002/14651858.CD007824.pub2  
10.1002/14651858.CD011308.pub2  
10.1002/14651858.CD006683.pub3  
10.1002/14651858.CD011160.pub2  
10.1002/14651858.CD003169.pub4  
10.1002/14651858.CD006539.pub4  
10.1002/14651858.CD011965.pub2  
10.1002/14651858.CD011080.pub2  
10.1002/14651858.CD006364.pub3  
10.1002/14651858.CD006757.pub4  
10.1002/14651858.CD011075.pub2  
10.1002/14651858.CD010520.pub2  
10.1002/14651858.CD012131.pub2  
10.1002/14651858.CD007097.pub3  
10.1002/14651858.CD010746.pub2  
10.1002/14651858.CD009327.pub3  
10.1002/14651858.CD009781.pub2  
10.1002/14651858.CD006499.pub4  
10.1002/14651858.CD011109.pub2  
10.1002/14651858.CD006775.pub3  
10.1002/14651858.CD007419.pub5  
10.1002/14651858.CD000253.pub4  
10.1002/14651858.CD010516.pub2  
10.1002/14651858.CD004918.pub3  
10.1002/14651858.CD000254.pub4  
10.1002/14651858.CD010510.pub2  
10.1002/14651858.CD006210.pub3  
10.1002/14651858.CD009094  
10.1002/14651858.CD006563.pub2  
10.1002/14651858.CD005528.pub2  
10.1002/14651858.CD003318.pub3

10.1002/14651858.CD008451.pub2  
10.1002/14651858.CD007673.pub2  
10.1002/14651858.CD007019.pub2  
10.1002/14651858.CD000125.pub4  
10.1002/14651858.CD001270.pub2  
10.1002/14651858.CD006413.pub2  
10.1002/14651858.CD004538.pub2  
10.1002/14651858.CD002212.pub2  
10.1002/14651858.CD005609.pub2  
10.1002/14651858.CD007899.pub2  
10.1002/14651858.CD009401.pub2  
10.1002/14651858.CD007672.pub2  
10.1002/14651858.CD000259.pub3  
10.1002/14651858.CD005315.pub2  
10.1002/14651858.CD002964.pub2  
10.1002/14651858.CD007990.pub2  
10.1002/14651858.CD008476.pub2  
10.1002/14651858.CD007813.pub2  
10.1002/14651858.CD008959.pub2  
10.1002/14651858.CD007849.pub2  
10.1002/14651858.CD008223.pub2  
10.1002/14651858.CD007992.pub2  
10.1002/14651858.CD009009.pub2  
10.1002/14651858.CD004398.pub3  
10.1002/14651858.CD006411.pub4  
10.1002/14651858.CD010398  
10.1002/14651858.CD002213.pub3  
10.1002/14651858.CD009035.pub2  
10.1002/14651858.CD002097.pub3  
10.1002/14651858.CD006559.pub2  
10.1002/14651858.CD009853.pub2  
10.1002/14651858.CD002894.pub3  
10.1002/14651858.CD010076.pub2  
10.1002/14651858.CD008194.pub3  
10.1002/14651858.CD006208.pub3  
10.1002/14651858.CD005979.pub2  
10.1002/14651858.CD004749.pub3  
10.1002/14651858.CD005610.pub2  
10.1002/14651858.CD006732.pub3  
10.1002/14651858.CD009186.pub2  
10.1002/14651858.CD008165.pub3  
10.1002/14651858.CD009404.pub3  
10.1002/14651858.CD007071.pub3

10.1002/14651858.CD009149.pub2  
10.1002/14651858.CD001730.pub3  
10.1002/14651858.CD005470.pub3  
10.1002/14651858.CD007193.pub2  
10.1002/14651858.CD005314.pub3  
10.1002/14651858.CD007017.pub2  
10.1002/14651858.CD006731.pub2  
10.1002/14651858.CD007988.pub2  
10.1002/14651858.CD000313.pub5  
10.1002/14651858.CD009095.pub3  
10.1002/14651858.CD009231.pub2  
10.1002/14651858.CD009926.pub2  
10.1002/14651858.CD007492.pub2  
10.1002/14651858.CD008986.pub3  
10.1002/14651858.CD006560.pub3  
10.1002/14651858.CD009794.pub2  
10.1002/14651858.CD010123.pub2  
10.1002/14651858.CD009855.pub2  
10.1002/14651858.CD007495.pub2  
10.1002/14651858.CD008145.pub3  
10.1002/14651858.CD009677.pub2  
10.1002/14651858.CD008856.pub2  
10.1002/14651858.CD010669.pub2  
10.1002/14651858.CD003540.pub3  
10.1002/14651858.CD002098.pub2  
10.1002/14651858.CD007491.pub2  
10.1002/14651858.CD010034.pub2  
10.1002/14651858.CD008992.pub3  
10.1002/14651858.CD011227.pub2  
10.1002/14651858.CD009844.pub2  
10.1002/14651858.CD011153.pub2  
10.1002/14651858.CD004910.pub3  
10.1002/14651858.CD000072.pub3  
10.1002/14651858.CD000356.pub4  
10.1002/14651858.CD001175.pub4  
10.1002/14651858.CD003543.pub4  
10.1002/14651858.CD008131.pub2  
10.1002/14651858.CD003681.pub3  
10.1002/14651858.CD009218.pub2  
10.1002/14651858.CD008372.pub2  
10.1002/14651858.CD009085.pub2  
10.1002/14651858.CD003018.pub3  
10.1002/14651858.CD003495.pub3

10.1002/14651858.CD001930.pub3  
10.1002/14651858.CD005039.pub3  
10.1002/14651858.CD008511.pub2  
10.1002/14651858.CD007986.pub2  
10.1002/14651858.CD009260.pub2  
10.1002/14651858.CD009456.pub2  
10.1002/14651858.CD007991.pub2  
10.1002/14651858.CD008225.pub2  
10.1002/14651858.CD004796.pub2  
10.1002/14651858.CD005652.pub2  
10.1002/14651858.CD007507.pub2  
10.1002/14651858.CD002796.pub2  
10.1002/14651858.CD009115.pub2  
10.1002/14651858.CD009084.pub2  
10.1002/14651858.CD008898.pub2  
10.1002/14651858.CD009774.pub2  
10.1002/14651858.CD009000.pub2  
10.1002/14651858.CD001444.pub2  
10.1002/14651858.CD005038.pub3  
10.1002/14651858.CD004383.pub3  
10.1002/14651858.CD004534.pub3  
10.1002/14651858.CD004677.pub3  
10.1002/14651858.CD009584.pub2  
10.1002/14651858.CD009728.pub2  
10.1002/14651858.CD008785.pub2  
10.1002/14651858.CD006546.pub3  
10.1002/14651858.CD004381.pub3  
10.1002/14651858.CD006997.pub2  
10.1002/14651858.CD010544.pub2  
10.1002/14651858.CD002020.pub4  
10.1002/14651858.CD010543.pub2  
10.1002/14651858.CD003942.pub3  
10.1002/14651858.CD010534.pub2  
10.1002/14651858.CD007989.pub2  
10.1002/14651858.CD009383.pub2  
10.1002/14651858.CD009384.pub2  
10.1002/14651858.CD009924.pub2  
10.1002/14651858.CD010766.pub2  
10.1002/14651858.CD003406.pub4  
10.1002/14651858.CD010012.pub2  
10.1002/14651858.CD008958.pub2  
10.1002/14651858.CD004380.pub3  
10.1002/14651858.CD010459.pub2

10.1002/14651858.CD009257.pub2  
10.1002/14651858.CD011546.pub2  
10.1002/14651858.CD007007.pub3  
10.1002/14651858.CD009996.pub2  
10.1002/14651858.CD009043.pub3  
10.1002/14651858.CD009398.pub3  
10.1002/14651858.CD005043.pub3  
10.1002/14651858.CD009999.pub2  
10.1002/14651858.CD003680.pub3  
10.1002/14651858.CD009747.pub2  
10.1002/14651858.CD010922.pub2  
10.1002/14651858.CD006047.pub5  
10.1002/14651858.CD010973.pub2  
10.1002/14651858.CD010971.pub2  
10.1002/14651858.CD010972.pub2  
10.1002/14651858.CD008524.pub3  
10.1002/14651858.CD009242.pub3  
10.1002/14651858.CD008559.pub3  
10.1002/14651858.CD010914.pub2  
10.1002/14651858.CD011660.pub2  
10.1002/14651858.CD009885.pub2  
10.1002/14651858.CD005198.pub3  
10.1002/14651858.CD008818.pub2  
10.1002/14651858.CD008235.pub2  
10.1002/14651858.CD006505.pub2  
10.1002/14651858.CD007678.pub2  
10.1002/14651858.CD008078.pub2  
10.1002/14651858.CD003188.pub3  
10.1002/14651858.CD009355.pub2  
10.1002/14651858.CD009045.pub2  
10.1002/14651858.CD004626.pub3  
10.1002/14651858.CD004269.pub3  
10.1002/14651858.CD008079.pub2  
10.1002/14651858.CD008238.pub3  
10.1002/14651858.CD009159.pub2  
10.1002/14651858.CD006503.pub3  
10.1002/14651858.CD009411.pub2  
10.1002/14651858.CD008909.pub2  
10.1002/14651858.CD009594.pub2  
10.1002/14651858.CD006407.pub2  
10.1002/14651858.CD010146.pub2  
10.1002/14651858.CD010189.pub2  
10.1002/14651858.CD009211.pub2

10.1002/14651858.CD010280.pub2  
10.1002/14651858.CD003407.pub5  
10.1002/14651858.CD010340.pub2  
10.1002/14651858.CD009075.pub2  
10.1002/14651858.CD010533.pub2  
10.1002/14651858.CD010298.pub2  
10.1002/14651858.CD009311.pub2  
10.1002/14651858.CD008562.pub3  
10.1002/14651858.CD010615.pub2  
10.1002/14651858.CD011577.pub2  
10.1002/14651858.CD010432.pub2  
10.1002/14651858.CD010981.pub2  
10.1002/14651858.CD010248.pub2  
10.1002/14651858.CD010984.pub2  
10.1002/14651858.CD011157.pub2  
10.1002/14651858.CD010983.pub2  
10.1002/14651858.CD007107.pub3  
10.1002/14651858.CD009624.pub2  
10.1002/14651858.CD009310.pub2  
10.1002/14651858.CD009733.pub3  
10.1002/14651858.CD010816.pub2  
10.1002/14651858.CD011756.pub2  
10.1002/14651858.CD010982.pub2  
10.1002/14651858.CD012055.pub2  
10.1002/14651858.CD011305.pub2  
10.1002/14651858.CD007941.pub3  
10.1002/14651858.CD007110.pub3  
10.1002/14651858.CD008814.pub2  
10.1002/14651858.CD008414.pub2  
10.1002/14651858.CD008013.pub2  
10.1002/14651858.CD008538.pub2  
10.1002/14651858.CD007443.pub2  
10.1002/14651858.CD006913.pub2  
10.1002/14651858.CD008424.pub2  
10.1002/14651858.CD004118.pub2  
10.1002/14651858.CD009710.pub2  
10.1002/14651858.CD009400.pub2  
10.1002/14651858.CD005111.pub3  
10.1002/14651858.CD006095.pub3  
10.1002/14651858.CD010410.pub2  
10.1002/14651858.CD003460.pub3  
10.1002/14651858.CD006320.pub4  
10.1002/14651858.CD008486.pub2



10.1002/14651858.CD003459.pub4  
10.1002/14651858.CD010233.pub2  
10.1002/14651858.CD007571.pub2  
10.1002/14651858.CD006884.pub3  
10.1002/14651858.CD006618.pub3  
10.1002/14651858.CD002913.pub3  
10.1002/14651858.CD007744.pub2  
10.1002/14651858.CD006774.pub4  
10.1002/14651858.CD007560.pub3  
10.1002/14651858.CD006790.pub3  
10.1002/14651858.CD000296.pub4  
10.1002/14651858.CD008655.pub3  
10.1002/14651858.CD001176.pub3  
10.1002/14651858.CD000067.pub3  
10.1002/14651858.CD007698.pub3  
10.1002/14651858.CD011661.pub2  
10.1002/14651858.CD007348.pub2  
10.1002/14651858.CD004827.pub4  
10.1002/14651858.CD000478.pub4  
10.1002/14651858.CD000299.pub3  
10.1002/14651858.CD000543.pub4  
10.1002/14651858.CD000544.pub4  
10.1002/14651858.CD010642.pub2  
10.1002/14651858.CD008870.pub2  
10.1002/14651858.CD003715.pub3  
10.1002/14651858.CD009118.pub3  
10.1002/14651858.CD000545.pub5  
10.1002/14651858.CD010873.pub4  
10.1002/14651858.CD007572.pub3  
10.1002/14651858.CD006096.pub4  
10.1002/14651858.CD011256.pub2  
10.1002/14651858.CD004610.pub5  
10.1002/14651858.CD012351.pub2  
10.1002/14651858.CD005606.pub2  
10.1002/14651858.CD008234.pub2  
10.1002/14651858.CD002211.pub2  
10.1002/14651858.CD001935.pub3  
10.1002/14651858.CD008607.pub2  
10.1002/14651858.CD008514.pub2  
10.1002/14651858.CD008515.pub2  
10.1002/14651858.CD002851.pub4  
10.1002/14651858.CD007960.pub2  
10.1002/14651858.CD008263.pub2

10.1002/14651858.CD003997.pub2  
10.1002/14651858.CD003423.pub3  
10.1002/14651858.CD007946.pub2  
10.1002/14651858.CD008675.pub2  
10.1002/14651858.CD009238.pub2  
10.1002/14651858.CD008693.pub2  
10.1002/14651858.CD006987.pub2  
10.1002/14651858.CD004461.pub3  
10.1002/14651858.CD004739.pub4  
10.1002/14651858.CD005053.pub4  
10.1002/14651858.CD006371.pub3  
10.1002/14651858.CD005607.pub4  
10.1002/14651858.CD005395.pub3  
10.1002/14651858.CD003852.pub3  
10.1002/14651858.CD007904.pub3  
10.1002/14651858.CD006285.pub2  
10.1002/14651858.CD008512.pub2  
10.1002/14651858.CD009441.pub2  
10.1002/14651858.CD003998.pub3  
10.1002/14651858.CD007806.pub4  
10.1002/14651858.CD009810.pub2  
10.1002/14651858.CD010151.pub2  
10.1002/14651858.CD008669.pub2  
10.1002/14651858.CD006991.pub2  
10.1002/14651858.CD001802.pub3  
10.1002/14651858.CD002027.pub2  
10.1002/14651858.CD003162.pub3  
10.1002/14651858.CD008419.pub2  
10.1002/14651858.CD005397.pub4  
10.1002/14651858.CD010198.pub2  
10.1002/14651858.CD010591.pub2  
10.1002/14651858.CD011165.pub2  
10.1002/14651858.CD010375.pub2  
10.1002/14651858.CD011992.pub2  
10.1002/14651858.CD011991.pub2  
10.1002/14651858.CD011995.pub2  
10.1002/14651858.CD011996.pub2  
10.1002/14651858.CD011994.pub2  
10.1002/14651858.CD010696.pub2  
10.1002/14651858.CD011993.pub2  
10.1002/14651858.CD009163.pub3  
10.1002/14651858.CD011112.pub2  
10.1002/14651858.CD010342.pub3

10.1002/14651858.CD009832.pub2  
10.1002/14651858.CD011684.pub2  
10.1002/14651858.CD006287.pub4  
10.1002/14651858.CD007294.pub2  
10.1002/14651858.CD007584.pub2  
10.1002/14651858.CD003752.pub3  
10.1002/14651858.CD007697.pub2  
10.1002/14651858.CD002224.pub2  
10.1002/14651858.CD001040.pub2  
10.1002/14651858.CD003911.pub2  
10.1002/14651858.CD002834.pub2  
10.1002/14651858.CD007930.pub2  
10.1002/14651858.CD001035.pub2  
10.1002/14651858.CD003175.pub2  
10.1002/14651858.CD007565.pub2  
10.1002/14651858.CD008018.pub2  
10.1002/14651858.CD007927.pub3  
10.1002/14651858.CD006013.pub3  
10.1002/14651858.CD008664.pub2  
10.1002/14651858.CD007945.pub2  
10.1002/14651858.CD003916.pub4  
10.1002/14651858.CD005007.pub3  
10.1002/14651858.CD007583.pub3  
10.1002/14651858.CD004386.pub3  
10.1002/14651858.CD005343.pub3  
10.1002/14651858.CD003915.pub4  
10.1002/14651858.CD006655.pub2  
10.1002/14651858.CD007406.pub3  
10.1002/14651858.CD006469.pub2  
10.1002/14651858.CD007064.pub2  
10.1002/14651858.CD005196.pub4  
10.1002/14651858.CD008765.pub3  
10.1002/14651858.CD006812.pub3  
10.1002/14651858.CD007566.pub2  
10.1002/14651858.CD008465.pub2  
10.1002/14651858.CD007730.pub2  
10.1002/14651858.CD008217.pub3  
10.1002/14651858.CD003751.pub3  
10.1002/14651858.CD007415.pub2  
10.1002/14651858.CD009620.pub2  
10.1002/14651858.CD003296.pub3  
10.1002/14651858.CD007414.pub3  
10.1002/14651858.CD003038.pub2

10.1002/14651858.CD006910.pub2  
10.1002/14651858.CD009884.pub2  
10.1002/14651858.CD006651.pub3  
10.1002/14651858.CD008215.pub2  
10.1002/14651858.CD010482.pub2  
10.1002/14651858.CD003992.pub3  
10.1002/14651858.CD010192.pub2  
10.1002/14651858.CD008983.pub2  
10.1002/14651858.CD001421.pub3  
10.1002/14651858.CD003295.pub3  
10.1002/14651858.CD009685.pub2  
10.1002/14651858.CD009896.pub2  
10.1002/14651858.CD004707.pub3  
10.1002/14651858.CD001318.pub3  
10.1002/14651858.CD009454.pub2  
10.1002/14651858.CD007928.pub3  
10.1002/14651858.CD012023.pub2  
10.1002/14651858.CD004121.pub3  
10.1002/14651858.CD005216.pub2  
10.1002/14651858.CD004861.pub2  
10.1002/14651858.CD007104.pub2  
10.1002/14651858.CD010681.pub2  
10.1002/14651858.CD006912.pub2  
10.1002/14651858.CD002855.pub4  
10.1002/14651858.CD003553.pub3  
10.1002/14651858.CD006649.pub6  
10.1002/14651858.CD009447.pub2  
10.1002/14651858.CD006466.pub5  
10.1002/14651858.CD000969.pub2  
10.1002/14651858.CD002033.pub2  
10.1002/14651858.CD000239.pub2  
10.1002/14651858.CD006650.pub4  
10.1002/14651858.CD000026.pub2  
10.1002/14651858.CD006119.pub3  
10.1002/14651858.CD008218.pub3  
10.1002/14651858.CD007563.pub3  
10.1002/14651858.CD005590.pub3  
10.1002/14651858.CD010401.pub2  
10.1002/14651858.CD007287.pub3  
10.1002/14651858.CD003039.pub2  
10.1002/14651858.CD006468.pub5  
10.1002/14651858.CD011335.pub2  
10.1002/14651858.CD011422

10.1002/14651858.CD007103.pub3  
10.1002/14651858.CD010260.pub2  
10.1002/14651858.CD007929.pub3  
10.1002/14651858.CD009229.pub2  
10.1002/14651858.CD005341.pub3  
10.1002/14651858.CD007924.pub3  
10.1002/14651858.CD011006.pub2  
10.1002/14651858.CD008478.pub2  
10.1002/14651858.CD004706.pub5  
10.1002/14651858.CD006014.pub7  
10.1002/14651858.CD009464.pub2  
10.1002/14651858.CD005340.pub4  
10.1002/14651858.CD011837.pub2  
10.1002/14651858.CD011732.pub2  
10.1002/14651858.CD007731.pub3  
10.1002/14651858.CD011376.pub2  
10.1002/14651858.CD005008.pub4  
10.1002/14651858.CD005005.pub4  
10.1002/14651858.CD007102.pub4  
10.1002/14651858.CD003455.pub2  
10.1002/14651858.CD005339.pub2  
10.1002/14651858.CD011322.pub2  
10.1002/14651858.CD006120.pub4  
10.1002/14651858.CD011475.pub2  
10.1002/14651858.CD011325.pub2  
10.1002/14651858.CD009957.pub2  
10.1002/14651858.CD005342.pub4  
10.1002/14651858.CD006911.pub3  
10.1002/14651858.CD009836.pub2  
10.1002/14651858.CD010931.pub2  
10.1002/14651858.CD008216.pub5  
10.1002/14651858.CD007387.pub4  
10.1002/14651858.CD011773.pub2  
10.1002/14651858.CD003914.pub4  
10.1002/14651858.CD007289.pub3  
10.1002/14651858.CD009038.pub2  
10.1002/14651858.CD005217.pub2  
10.1002/14651858.CD008896.pub2  
10.1002/14651858.CD009251.pub2  
10.1002/14651858.CD004316.pub4  
10.1002/14651858.CD006260.pub3  
10.1002/14651858.CD003990.pub4  
10.1002/14651858.CD004425.pub6

10.1002/14651858.CD006964.pub3  
10.1002/14651858.CD003989.pub5  
10.1002/14651858.CD003449.pub5  
10.1002/14651858.CD007541.pub3  
10.1002/14651858.CD010662.pub2  
10.1002/14651858.CD005218.pub4  
10.1002/14651858.CD004317.pub4  
10.1002/14651858.CD003552.pub4  
10.1002/14651858.CD003987.pub5  
10.1002/14651858.CD004112.pub4  
10.1002/14651858.CD003991.pub4  
10.1002/14651858.CD006134.pub5  
10.1002/14651858.CD010915.pub2  
10.1002/14651858.CD006133.pub5  
10.1002/14651858.CD006033.pub5  
10.1002/14651858.CD001777.pub4  
10.1002/14651858.CD007444.pub4  
10.1002/14651858.CD011298.pub2  
10.1002/14651858.CD004695.pub3  
10.1002/14651858.CD007595.pub3  
10.1002/14651858.CD003988.pub2  
10.1002/14651858.CD011159.pub2  
10.1002/14651858.CD011242.pub2  
10.1002/14651858.CD009849.pub3  
10.1002/14651858.CD003036.pub3  
10.1002/14651858.CD009805.pub3  
10.1002/14651858.CD001863.pub4  
10.1002/14651858.CD001329.pub2  
10.1002/14651858.CD007373.pub3  
10.1002/14651858.CD011054.pub2  
10.1002/14651858.CD011528.pub2  
10.1002/14651858.CD012025.pub2  
10.1002/14651858.CD012249  
10.1002/14651858.CD003034.pub4  
10.1002/14651858.CD005215.pub3  
10.1002/14651858.CD010243.pub3  
10.1002/14651858.CD008452.pub4  
10.1002/14651858.CD008815.pub4  
10.1002/14651858.CD011913.pub2  
10.1002/14651858.CD011031.pub2  
10.1002/14651858.CD008582.pub2  
10.1002/14651858.CD007683.pub3  
10.1002/14651858.CD007249.pub5

10.1002/14651858.CD001298.pub4  
10.1002/14651858.CD009592.pub2  
10.1002/14651858.CD006567.pub3  
10.1002/14651858.CD005289.pub3  
10.1002/14651858.CD005355.pub5  
10.1002/14651858.CD010047.pub2  
10.1002/14651858.CD010461.pub2  
10.1002/14651858.CD010001.pub2  
10.1002/14651858.CD004638.pub3  
10.1002/14651858.CD006108.pub4  
10.1002/14651858.CD004508.pub4  
10.1002/14651858.CD005999.pub2  
10.1002/14651858.CD008046.pub4  
10.1002/14651858.CD006105.pub3  
10.1002/14651858.CD006942.pub3  
10.1002/14651858.CD007411.pub3  
10.1002/14651858.CD011320.pub2  
10.1002/14651858.CD011066.pub2  
10.1002/14651858.CD009461.pub3  
10.1002/14651858.CD011345.pub2  
10.1002/14651858.CD005073.pub4  
10.1002/14651858.CD010854.pub2  
10.1002/14651858.CD005998.pub2  
10.1002/14651858.CD009517.pub3  
10.1002/14651858.CD000475.pub3  
10.1002/14651858.CD003718.pub4  
10.1002/14651858.CD009577.pub3  
10.1002/14651858.CD002126.pub3  
10.1002/14651858.CD003677.pub5  
10.1002/14651858.CD010290.pub2  
10.1002/14651858.CD006106.pub3  
10.1002/14651858.CD006583.pub4  
10.1002/14651858.CD003357.pub4  
10.1002/14651858.CD006919.pub4  
10.1002/14651858.CD001751.pub3  
10.1002/14651858.CD009154.pub3  
10.1002/14651858.CD007245.pub3  
10.1002/14651858.CD009749.pub2  
10.1002/14651858.CD009814.pub2  
10.1002/14651858.CD007876.pub2  
10.1002/14651858.CD003855.pub3  
10.1002/14651858.CD001838.pub5  
10.1002/14651858.CD012079

10.1002/14651858.CD000360.pub5  
10.1002/14651858.CD009023.pub2  
10.1002/14651858.CD006107.pub4  
10.1002/14651858.CD002124.pub2  
10.1002/14651858.CD011034.pub2  
10.1002/14651858.CD007854.pub3  
10.1002/14651858.CD003719.pub4  
10.1002/14651858.CD007689.pub3  
10.1002/14651858.CD011537.pub2  
10.1002/14651858.CD001750.pub4  
10.1002/14651858.CD011424.pub2  
10.1002/14651858.CD002118.pub5  
10.1002/14651858.CD001302.pub3  
10.1002/14651858.CD010407.pub2  
10.1002/14651858.CD012376  
10.1002/14651858.CD004832.pub4  
10.1002/14651858.CD001500.pub3  
10.1002/14651858.CD008536.pub3  
10.1002/14651858.CD007535.pub3  
10.1002/14651858.CD003938.pub2  
10.1002/14651858.CD008741.pub2  
10.1002/14651858.CD007501.pub2  
10.1002/14651858.CD001220.pub3  
10.1002/14651858.CD007496.pub2  
10.1002/14651858.CD009337  
10.1002/14651858.CD007844.pub2  
10.1002/14651858.CD008739.pub2  
10.1002/14651858.CD006045.pub3  
10.1002/14651858.CD004776.pub3  
10.1002/14651858.CD009513  
10.1002/14651858.CD005274.pub3  
10.1002/14651858.CD009756  
10.1002/14651858.CD005272.pub3  
10.1002/14651858.CD007189.pub3  
10.1002/14651858.CD009755  
10.1002/14651858.CD009748.pub2  
10.1002/14651858.CD001224.pub4  
10.1002/14651858.CD003510.pub3  
10.1002/14651858.CD009192.pub2  
10.1002/14651858.CD009468.pub2  
10.1002/14651858.CD007191.pub2  
10.1002/14651858.CD005175.pub3  
10.1002/14651858.CD010119



10.1002/14651858.CD009190.pub2  
10.1002/14651858.CD009153.pub3  
10.1002/14651858.CD004536.pub3  
10.1002/14651858.CD009012.pub2  
10.1002/14651858.CD005481.pub3  
10.1002/14651858.CD009189.pub2  
10.1002/14651858.CD008270.pub2  
10.1002/14651858.CD010929.pub2  
10.1002/14651858.CD009826.pub2  
10.1002/14651858.CD010309.pub2  
10.1002/14651858.CD009987.pub2  
10.1002/14651858.CD010666  
10.1002/14651858.CD004772.pub4  
10.1002/14651858.CD008439.pub3  
10.1002/14651858.CD009886.pub2  
10.1002/14651858.CD007331.pub3  
10.1002/14651858.CD008720.pub2  
10.1002/14651858.CD007497.pub2  
10.1002/14651858.CD003256.pub2  
10.1002/14651858.CD003363.pub3  
10.1002/14651858.CD011323  
10.1002/14651858.CD008605.pub3  
10.1002/14651858.CD002249.pub5  
10.1002/14651858.CD004014.pub6  
10.1002/14651858.CD004378.pub3  
10.1002/14651858.CD004753.pub4  
10.1002/14651858.CD009090.pub2  
10.1002/14651858.CD004752.pub2  
10.1002/14651858.CD010503.pub2  
10.1002/14651858.CD011872.pub2  
10.1002/14651858.CD002811.pub4  
10.1002/14651858.CD011184.pub2  
10.1002/14651858.CD010770.pub2  
10.1002/14651858.CD004143.pub5  
10.1002/14651858.CD005070.pub3  
10.1002/14651858.CD009881.pub2  
10.1002/14651858.CD003414.pub3  
10.1002/14651858.CD006150.pub2  
10.1002/14651858.CD006109.pub3  
10.1002/14651858.CD004637.pub2  
10.1002/14651858.CD004472.pub3  
10.1002/14651858.CD007038.pub2  
10.1002/14651858.CD008012.pub3

10.1002/14651858.CD005566.pub3  
10.1002/14651858.CD001561.pub3  
10.1002/14651858.CD003040.pub2  
10.1002/14651858.CD005158.pub3  
10.1002/14651858.CD004466.pub3  
10.1002/14651858.CD007101.pub2  
10.1002/14651858.CD007224.pub2  
10.1002/14651858.CD002752.pub3  
10.1002/14651858.CD008523.pub2  
10.1002/14651858.CD004194.pub3  
10.1002/14651858.CD003334.pub2  
10.1002/14651858.CD002137.pub3  
10.1002/14651858.CD008844.pub2  
10.1002/14651858.CD008685.pub2  
10.1002/14651858.CD010118.pub2  
10.1002/14651858.CD009581.pub2  
10.1002/14651858.CD009671.pub2  
10.1002/14651858.CD003611.pub3  
10.1002/14651858.CD004816.pub5  
10.1002/14651858.CD009874.pub2  
10.1002/14651858.CD003464.pub2  
10.1002/14651858.CD005151.pub2  
10.1002/14651858.CD009507.pub2  
10.1002/14651858.CD002751.pub3  
10.1002/14651858.CD009934.pub2  
10.1002/14651858.CD005351.pub3  
10.1002/14651858.CD009825.pub2  
10.1002/14651858.CD004471.pub3  
10.1002/14651858.CD010392.pub2  
10.1002/14651858.CD010393.pub2  
10.1002/14651858.CD010395.pub2  
10.1002/14651858.CD002128.pub5  
10.1002/14651858.CD002130.pub4  
10.1002/14651858.CD003336.pub3  
10.1002/14651858.CD008842.pub2  
10.1002/14651858.CD006577.pub3  
10.1002/14651858.CD007260.pub3  
10.1002/14651858.CD010366.pub2  
10.1002/14651858.CD002901.pub3  
10.1002/14651858.CD010072.pub2  
10.1002/14651858.CD009917.pub2  
10.1002/14651858.CD003463.pub2  
10.1002/14651858.CD008684.pub2

10.1002/14651858.CD003331.pub4  
10.1002/14651858.CD009752.pub2  
10.1002/14651858.CD009669.pub2  
10.1002/14651858.CD007131.pub3  
10.1002/14651858.CD009387.pub2  
10.1002/14651858.CD003462.pub3  
10.1002/14651858.CD010652.pub2  
10.1002/14651858.CD010191.pub2  
10.1002/14651858.CD010405.pub2  
10.1002/14651858.CD006870.pub3  
10.1002/14651858.CD009502.pub3  
10.1002/14651858.CD007259.pub2  
10.1002/14651858.CD009217.pub3  
10.1002/14651858.CD003712.pub3  
10.1002/14651858.CD009515.pub2  
10.1002/14651858.CD002229.pub4  
10.1002/14651858.CD007398.pub3  
10.1002/14651858.CD005050.pub3  
10.1002/14651858.CD004370.pub3  
10.1002/14651858.CD009503.pub3  
10.1002/14651858.CD003176.pub3  
10.1002/14651858.CD010237.pub2  
10.1002/14651858.CD005049.pub4  
10.1002/14651858.CD010390.pub2  
10.1002/14651858.CD004101.pub5  
10.1002/14651858.CD004818.pub4  
10.1002/14651858.CD007614.pub2  
10.1002/14651858.CD006886.pub2  
10.1002/14651858.CD011148.pub2  
10.1002/14651858.CD011163.pub2  
10.1002/14651858.CD011737  
10.1002/14651858.CD011168.pub2  
10.1002/14651858.CD011583.pub2  
10.1002/14651858.CD008553.pub2  
10.1002/14651858.CD009580.pub2  
10.1002/14651858.CD011094.pub2  
10.1002/14651858.CD009889.pub2  
10.1002/14651858.CD006536.pub4  
10.1002/14651858.CD008093.pub2  
10.1002/14651858.CD009386.pub2  
10.1002/14651858.CD006781.pub3  
10.1002/14651858.CD011834  
10.1002/14651858.CD011472.pub2

10.1002/14651858.CD007037.pub3  
10.1002/14651858.CD006762.pub2  
10.1002/14651858.CD001800.pub3  
10.1002/14651858.CD010411.pub2  
10.1002/14651858.CD010988.pub2  
10.1002/14651858.CD011047.pub2  
10.1002/14651858.CD007228.pub3  
10.1002/14651858.CD011637.pub2  
10.1002/14651858.CD010876.pub2  
10.1002/14651858.CD004815.pub4  
10.1002/14651858.CD009586.pub3  
10.1002/14651858.CD009077.pub3  
10.1002/14651858.CD009880.pub2  
10.1002/14651858.CD009571.pub2  
10.1002/14651858.CD003839.pub3  
10.1002/14651858.CD003333.pub3  
10.1002/14651858.CD009753.pub2  
10.1002/14651858.CD009462.pub2  
10.1002/14651858.CD007160.pub4  
10.1002/14651858.CD012088.pub2  
10.1002/14651858.CD011747.pub2  
10.1002/14651858.CD011197.pub2  
10.1002/14651858.CD009868.pub3  
10.1002/14651858.CD008966.pub2  
10.1002/14651858.CD004371.pub4  
10.1002/14651858.CD011814.pub2  
10.1002/14651858.CD007888.pub3  
10.1002/14651858.CD012264.pub2  
10.1002/14651858.CD011114.pub2  
10.1002/14651858.CD006887.pub4  
10.1002/14651858.CD011793.pub2  
10.1002/14651858.CD011851.pub2  
10.1002/14651858.CD011986.pub2  
10.1002/14651858.CD011719.pub3  
10.1002/14651858.CD008600.pub3  
10.1002/14651858.CD011748.pub2  
10.1002/14651858.CD007130.pub4  
10.1002/14651858.CD011312.pub3  
10.1002/14651858.CD008895.pub3  
10.1002/14651858.CD009744.pub2  
10.1002/14651858.CD004467.pub3  
10.1002/14651858.CD006612.pub5  
10.1002/14651858.CD005051.pub3

10.1002/14651858.CD002902.pub4  
10.1002/14651858.CD012481.pub2  
10.1002/14651858.CD003186.pub3  
10.1002/14651858.CD008118.pub2  
10.1002/14651858.CD005184.pub2  
10.1002/14651858.CD004184.pub2  
10.1002/14651858.CD007653.pub2  
10.1002/14651858.CD004643.pub3  
10.1002/14651858.CD006742.pub2  
10.1002/14651858.CD009096.pub2  
10.1002/14651858.CD008167.pub3  
10.1002/14651858.CD007452.pub2  
10.1002/14651858.CD008277.pub2  
10.1002/14651858.CD003824.pub2  
10.1002/14651858.CD010052.pub2  
10.1002/14651858.CD008117.pub2  
10.1002/14651858.CD007450.pub2  
10.1002/14651858.CD004937.pub2  
10.1002/14651858.CD008170.pub2  
10.1002/14651858.CD003825.pub4  
10.1002/14651858.CD010037.pub2  
10.1002/14651858.CD007449.pub2  
10.1002/14651858.CD010254.pub2  
10.1002/14651858.CD007435.pub3  
10.1002/14651858.CD007654.pub4  
10.1002/14651858.CD011745.pub2  
10.1002/14651858.CD008274.pub3  
10.1002/14651858.CD010316.pub2  
10.1002/14651858.CD007451.pub2  
10.1002/14651858.CD002003.pub5  
10.1002/14651858.CD008996.pub2  
10.1002/14651858.CD007655.pub3  
10.1002/14651858.CD011499.pub2  
10.1002/14651858.CD007066.pub3  
10.1002/14651858.CD008652.pub3  
10.1002/14651858.CD008276.pub2  
10.1002/14651858.CD011575.pub2  
10.1002/14651858.CD004022.pub4  
10.1002/14651858.CD008893.pub3  
10.1002/14651858.CD008226.pub3  
10.1002/14651858.CD003882.pub4  
10.1002/14651858.CD002240.pub4  
10.1002/14651858.CD009252

10.1002/14651858.CD005493.pub3  
10.1002/14651858.CD005230.pub2  
10.1002/14651858.CD004201.pub3  
10.1002/14651858.CD003306.pub2  
10.1002/14651858.CD009508  
10.1002/14651858.CD008224.pub2  
10.1002/14651858.CD004997.pub3  
10.1002/14651858.CD007471.pub2  
10.1002/14651858.CD003193.pub4  
10.1002/14651858.CD006934.pub3  
10.1002/14651858.CD005429.pub2  
10.1002/14651858.CD007959.pub3  
10.1002/14651858.CD004010.pub3  
10.1002/14651858.CD002238.pub2  
10.1002/14651858.CD001405.pub3  
10.1002/14651858.CD001202.pub5  
10.1002/14651858.CD002116.pub2  
10.1002/14651858.CD009408.pub2  
10.1002/14651858.CD002111.pub3  
10.1002/14651858.CD005428.pub2  
10.1002/14651858.CD001757.pub4  
10.1002/14651858.CD002114.pub2  
10.1002/14651858.CD003637.pub3  
10.1002/14651858.CD003195.pub3  
10.1002/14651858.CD004927.pub4  
10.1002/14651858.CD006744.pub3  
10.1002/14651858.CD002115.pub5  
10.1002/14651858.CD008306.pub3  
10.1002/14651858.CD005654.pub3  
10.1002/14651858.CD004013.pub4  
10.1002/14651858.CD010258.pub2  
10.1002/14651858.CD001756.pub6  
10.1002/14651858.CD005086.pub4  
10.1002/14651858.CD011179.pub2  
10.1002/14651858.CD010217.pub2  
10.1002/14651858.CD004464.pub3  
10.1002/14651858.CD003505.pub5  
10.1002/14651858.CD010551.pub3  
10.1002/14651858.CD001843.pub5  
10.1002/14651858.CD011115.pub2  
10.1002/14651858.CD004012.pub5  
10.1002/14651858.CD001758.pub3  
10.1002/14651858.CD004203.pub3

10.1002/14651858.CD003636.pub4  
10.1002/14651858.CD011627.pub2  
10.1002/14651858.CD002117.pub2  
10.1002/14651858.CD003881.pub4  
10.1002/14651858.CD002239.pub3  
10.1002/14651858.CD008709.pub3  
10.1002/14651858.CD001755.pub2  
10.1002/14651858.CD001754.pub4  
10.1002/14651858.CD002912.pub7  
10.1002/14651858.CD001088.pub3  
10.1002/14651858.CD006375.pub4  
10.1002/14651858.CD010098.pub4  
10.1002/14651858.CD005353.pub4  
10.1002/14651858.CD001837.pub3  
10.1002/14651858.CD009046.pub2  
10.1002/14651858.CD005084.pub3  
10.1002/14651858.CD001291.pub2  
10.1002/14651858.CD006219.pub3  
10.1002/14651858.CD000214.pub2  
10.1002/14651858.CD000191.pub2  
10.1002/14651858.CD007072.pub2  
10.1002/14651858.CD009325.pub2  
10.1002/14651858.CD002928.pub3  
10.1002/14651858.CD008033.pub3  
10.1002/14651858.CD009187.pub2  
10.1002/14651858.CD000165.pub4  
10.1002/14651858.CD004705.pub4  
10.1002/14651858.CD003086.pub3  
10.1002/14651858.CD007253.pub3  
10.1002/14651858.CD001188.pub4  
10.1002/14651858.CD003999.pub4  
10.1002/14651858.CD006102.pub2  
10.1002/14651858.CD000146.pub4  
10.1002/14651858.CD001293.pub3  
10.1002/14651858.CD002850.pub3  
10.1002/14651858.CD000009.pub4  
10.1002/14651858.CD002294.pub4  
10.1002/14651858.CD009990.pub2  
10.1002/14651858.CD002295.pub5  
10.1002/14651858.CD008743.pub3  
10.1002/14651858.CD001746.pub3  
10.1002/14651858.CD001118.pub3  
10.1002/14651858.CD009164.pub2

10.1002/14651858.CD003440.pub4  
10.1002/14651858.CD005549.pub3  
10.1002/14651858.CD004493.pub3  
10.1002/14651858.CD007505.pub2  
10.1002/14651858.CD004307.pub5  
10.1002/14651858.CD006936.pub3  
10.1002/14651858.CD009670.pub3  
10.1002/14651858.CD004306.pub5  
10.1002/14651858.CD000031.pub4  
10.1002/14651858.CD006611.pub4  
10.1002/14651858.CD005992.pub3  
10.1002/14651858.CD010078.pub2  
10.1002/14651858.CD008286.pub3  
10.1002/14651858.CD011120.pub2  
10.1002/14651858.CD011045.pub2  
10.1002/14651858.CD010274.pub2  
10.1002/14651858.CD010742.pub2  
10.1002/14651858.CD010216.pub3  
10.1002/14651858.CD011856.pub2  
10.1002/14651858.CD005231.pub3  
10.1002/14651858.CD006103.pub7  
10.1002/14651858.CD008645.pub3  
10.1002/14651858.CD001006.pub3  
10.1002/14651858.CD007078.pub5  
10.1002/14651858.CD011244.pub2  
10.1002/14651858.CD001292.pub3  
10.1002/14651858.CD001007.pub3  
10.1002/14651858.CD001055.pub5  
10.1002/14651858.CD008976.pub2  
10.1002/14651858.CD007349.pub2  
10.1002/14651858.CD006885.pub2  
10.1002/14651858.CD006576.pub2  
10.1002/14651858.CD008195.pub2  
10.1002/14651858.CD001532.pub4  
10.1002/14651858.CD009294.pub2  
10.1002/14651858.CD004926.pub3  
10.1002/14651858.CD009427.pub2  
10.1002/14651858.CD007234.pub2  
10.1002/14651858.CD004292.pub3  
10.1002/14651858.CD008007.pub2  
10.1002/14651858.CD006029.pub4  
10.1002/14651858.CD004135.pub3  
10.1002/14651858.CD009063.pub2



10.1002/14651858.CD008871.pub2  
10.1002/14651858.CD004720.pub3  
10.1002/14651858.CD008569.pub2  
10.1002/14651858.CD003382.pub3  
10.1002/14651858.CD003546.pub3  
10.1002/14651858.CD009071.pub2  
10.1002/14651858.CD007044.pub3  
10.1002/14651858.CD001423.pub3  
10.1002/14651858.CD008973.pub2  
10.1002/14651858.CD008529.pub3  
10.1002/14651858.CD011442.pub2  
10.1002/14651858.CD010716.pub2  
10.1002/14651858.CD009266.pub2  
10.1002/14651858.CD012111.pub2  
10.1002/14651858.CD012112.pub2  
10.1002/14651858.CD012045.pub2  
10.1002/14651858.CD009625.pub2  
10.1002/14651858.CD010723.pub2  
10.1002/14651858.CD011673.pub2  
10.1002/14651858.CD007152.pub2  
10.1002/14651858.CD001168.pub2  
10.1002/14651858.CD006545.pub2  
10.1002/14651858.CD005205.pub3  
10.1002/14651858.CD008092.pub2  
10.1002/14651858.CD008596.pub2  
10.1002/14651858.CD001541.pub3  
10.1002/14651858.CD008240.pub2  
10.1002/14651858.CD008838.pub2  
10.1002/14651858.CD003584.pub2  
10.1002/14651858.CD006983.pub3  
10.1002/14651858.CD008946.pub2  
10.1002/14651858.CD002086.pub2  
10.1002/14651858.CD004416.pub2  
10.1002/14651858.CD007633.pub2  
10.1002/14651858.CD008955.pub2  
10.1002/14651858.CD008642.pub2  
10.1002/14651858.CD007281.pub2  
10.1002/14651858.CD004054.pub3  
10.1002/14651858.CD009481.pub2  
10.1002/14651858.CD009446.pub2  
10.1002/14651858.CD004415.pub2  
10.1002/14651858.CD005028.pub3  
10.1002/14651858.CD005506.pub5

10.1002/14651858.CD008533.pub3  
10.1002/14651858.CD009779.pub2  
10.1002/14651858.CD004778.pub3  
10.1002/14651858.CD009662.pub2  
10.1002/14651858.CD008370.pub3  
10.1002/14651858.CD008107.pub2  
10.1002/14651858.CD002095.pub5  
10.1002/14651858.CD009179.pub2  
10.1002/14651858.CD010326.pub2  
10.1002/14651858.CD007999.pub2  
10.1002/14651858.CD005096.pub4  
10.1002/14651858.CD008415.pub2  
10.1002/14651858.CD010244.pub2  
10.1002/14651858.CD008446.pub3  
10.1002/14651858.CD008945.pub2  
10.1002/14651858.CD005584.pub3  
10.1002/14651858.CD008487.pub2  
10.1002/14651858.CD006640.pub3  
10.1002/14651858.CD005048.pub4  
10.1002/14651858.CD008337.pub2  
10.1002/14651858.CD005046.pub3  
10.1002/14651858.CD003353.pub2  
10.1002/14651858.CD008550.pub2  
10.1002/14651858.CD010623.pub2  
10.1002/14651858.CD010605.pub2  
10.1002/14651858.CD005583.pub2  
10.1002/14651858.CD008788.pub3  
10.1002/14651858.CD007884.pub3  
10.1002/14651858.CD001556.pub3  
10.1002/14651858.CD001964.pub4  
10.1002/14651858.CD008096.pub4  
10.1002/14651858.CD003243.pub3  
10.1002/14651858.CD008688.pub2  
10.1002/14651858.CD011382.pub2  
10.1002/14651858.CD011522.pub2  
10.1002/14651858.CD011521.pub2  
10.1002/14651858.CD004520.pub7  
10.1002/14651858.CD006053.pub6  
10.1002/14651858.CD011498.pub2  
10.1002/14651858.CD009621.pub2  
10.1002/14651858.CD011523.pub2  
10.1002/14651858.CD011390.pub2  
10.1002/14651858.CD009477.pub2

10.1002/14651858.CD011389.pub2  
10.1002/14651858.CD011392.pub2  
10.1002/14651858.CD011391.pub2  
10.1002/14651858.CD008914.pub3  
10.1002/14651858.CD010571.pub2  
10.1002/14651858.CD011383.pub2  
10.1002/14651858.CD011461.pub2  
10.1002/14651858.CD009034.pub2  
10.1002/14651858.CD011862.pub2  
10.1002/14651858.CD011194.pub2  
10.1002/14651858.CD011969.pub2  
10.1002/14651858.CD010511.pub2  
10.1002/14651858.CD010583.pub3  
10.1002/14651858.CD011384.pub2  
10.1002/14651858.CD012257.pub2  
10.1002/14651858.CD004064.pub4  
10.1002/14651858.CD000536.pub2  
10.1002/14651858.CD008472.pub2  
10.1002/14651858.CD008826.pub2  
10.1002/14651858.CD001272.pub2  
10.1002/14651858.CD007162.pub2  
10.1002/14651858.CD002070.pub2  
10.1002/14651858.CD007921.pub2  
10.1002/14651858.CD006687.pub3  
10.1002/14651858.CD000188.pub2  
10.1002/14651858.CD003635.pub3  
10.1002/14651858.CD009536.pub2  
10.1002/14651858.CD003230.pub4  
10.1002/14651858.CD002071.pub3  
10.1002/14651858.CD006512.pub2  
10.1002/14651858.CD007057.pub3  
10.1002/14651858.CD001368.pub4  
10.1002/14651858.CD000988.pub4  
10.1002/14651858.CD004001.pub3  
10.1002/14651858.CD000095.pub2  
10.1002/14651858.CD000986.pub3  
10.1002/14651858.CD001486.pub2  
10.1002/14651858.CD006888.pub3  
10.1002/14651858.CD003833.pub4  
10.1002/14651858.CD002784.pub2  
10.1002/14651858.CD009894.pub2  
10.1002/14651858.CD003074.pub3  
10.1002/14651858.CD004982.pub5

10.1002/14651858.CD003285.pub2  
10.1002/14651858.CD005507.pub3  
10.1002/14651858.CD005508.pub3  
10.1002/14651858.CD008201.pub2  
10.1002/14651858.CD005263.pub3  
10.1002/14651858.CD010308.pub2  
10.1002/14651858.CD010389.pub2  
10.1002/14651858.CD008426.pub2  
10.1002/14651858.CD009436.pub2  
10.1002/14651858.CD006137.pub2  
10.1002/14651858.CD010307.pub2  
10.1002/14651858.CD009992.pub2  
10.1002/14651858.CD003263.pub5  
10.1002/14651858.CD008138.pub3  
10.1002/14651858.CD008736.pub2  
10.1002/14651858.CD009864.pub2  
10.1002/14651858.CD010497.pub2  
10.1002/14651858.CD010017.pub2  
10.1002/14651858.CD010095.pub2  
10.1002/14651858.CD003262.pub5  
10.1002/14651858.CD007346.pub3  
10.1002/14651858.CD010081.pub2  
10.1002/14651858.CD010334.pub2  
10.1002/14651858.CD008774.pub2  
10.1002/14651858.CD005491.pub3  
10.1002/14651858.CD004685.pub3  
10.1002/14651858.CD011946.pub2  
10.1002/14651858.CD009687.pub2  
10.1002/14651858.CD011161.pub2  
10.1002/14651858.CD002954.pub3  
10.1002/14651858.CD004767.pub4  
10.1002/14651858.CD006345.pub3  
10.1002/14651858.CD009758.pub2  
10.1002/14651858.CD007628.pub4  
10.1002/14651858.CD004981.pub4  
10.1002/14651858.CD007917.pub2  
10.1002/14651858.CD010031.pub2  
10.1002/14651858.CD012119.pub2  
10.1002/14651858.CD003075.pub3  
10.1002/14651858.CD010525.pub2  
10.1002/14651858.CD001099.pub3  
10.1002/14651858.CD008819.pub3  
10.1002/14651858.CD005983.pub3

10.1002/14651858.CD003504.pub2  
10.1002/14651858.CD004178.pub2  
10.1002/14651858.CD010196.pub2  
10.1002/14651858.CD005982.pub2  
10.1002/14651858.CD003749.pub3  
10.1002/14651858.CD006680.pub2  
10.1002/14651858.CD001999.pub2  
10.1002/14651858.CD003747.pub4  
10.1002/14651858.CD009162.pub2  
10.1002/14651858.CD008207.pub3  
10.1002/14651858.CD001367.pub3  
10.1002/14651858.CD006767.pub3  
10.1002/14651858.CD010149.pub2  
10.1002/14651858.CD000990.pub3  
10.1002/14651858.CD009638.pub2  
10.1002/14651858.CD005624.pub3  
10.1002/14651858.CD003748.pub4  
10.1002/14651858.CD008462.pub2  
10.1002/14651858.CD010019.pub2  
10.1002/14651858.CD009543.pub3  
10.1002/14651858.CD002944.pub2  
10.1002/14651858.CD008347.pub3  
10.1002/14651858.CD006342.pub2  
10.1002/14651858.CD008203.pub3  
10.1002/14651858.CD001484.pub3  
10.1002/14651858.CD001835.pub4  
10.1002/14651858.CD001097.pub3  
10.1002/14651858.CD007561.pub2  
10.1002/14651858.CD005260.pub3  
10.1002/14651858.CD000535.pub3  
10.1002/14651858.CD009658.pub2  
10.1002/14651858.CD009648.pub3  
10.1002/14651858.CD007798.pub4  
10.1002/14651858.CD002786.pub3  
10.1002/14651858.CD010956.pub2  
10.1002/14651858.CD005625.pub3  
10.1002/14651858.CD010996.pub2  
10.1002/14651858.CD011015.pub2  
10.1002/14651858.CD005262.pub3  
10.1002/14651858.CD004437.pub4  
10.1002/14651858.CD010373.pub2  
10.1002/14651858.CD007699.pub3  
10.1002/14651858.CD010957.pub2

10.1002/14651858.CD007371.pub3  
10.1002/14651858.CD011033.pub3  
10.1002/14651858.CD004179.pub2  
10.1002/14651858.CD002069.pub5  
10.1002/14651858.CD009541.pub2  
10.1002/14651858.CD008942.pub2  
10.1002/14651858.CD003229.pub3  
10.1002/14651858.CD011319.pub2  
10.1002/14651858.CD005258.pub3  
10.1002/14651858.CD004002.pub3  
10.1002/14651858.CD009418.pub3  
10.1002/14651858.CD010878.pub2  
10.1002/14651858.CD002783.pub4  
10.1002/14651858.CD010637.pub2  
10.1002/14651858.CD008500.pub4  
10.1002/14651858.CD010447.pub3  
10.1002/14651858.CD011188.pub2  
10.1002/14651858.CD005134.pub3  
10.1002/14651858.CD010185.pub3  
10.1002/14651858.CD006771.pub3  
10.1002/14651858.CD001100.pub4  
10.1002/14651858.CD012302.pub2  
10.1002/14651858.CD002000.pub3  
10.1002/14651858.CD007557.pub3  
10.1002/14651858.CD005261.pub4  
10.1002/14651858.CD002001.pub3  
10.1002/14651858.CD011741.pub2  
10.1002/14651858.CD006681.pub4  
10.1002/14651858.CD010837.pub3  
10.1002/14651858.CD004174.pub3  
10.1002/14651858.CD009170.pub2  
10.1002/14651858.CD006308.pub3  
10.1002/14651858.CD010183.pub2  
10.1002/14651858.CD008570.pub2  
10.1002/14651858.CD009209.pub2  
10.1002/14651858.CD010208.pub2  
10.1002/14651858.CD008742.pub2  
10.1002/14651858.CD009776.pub2  
10.1002/14651858.CD006237.pub3  
10.1002/14651858.CD010090.pub2  
10.1002/14651858.CD002892.pub5  
10.1002/14651858.CD010305.pub2  
10.1002/14651858.CD007569.pub3

10.1002/14651858.CD009573.pub2  
10.1002/14651858.CD009385.pub2  
10.1002/14651858.CD006955.pub3  
10.1002/14651858.CD008881.pub2  
10.1002/14651858.CD010306.pub2  
10.1002/14651858.CD011621.pub2  
10.1002/14651858.CD010912.pub3  
10.1002/14651858.CD010157.pub2  
10.1002/14651858.CD009778.pub2  
10.1002/14651858.CD010641.pub2  
10.1002/14651858.CD011899.pub2  
10.1002/14651858.CD011618.pub2  
10.1002/14651858.CD011867.pub2  
10.1002/14651858.CD006396.pub4  
10.1002/14651858.CD011255.pub2  
10.1002/14651858.CD012462.pub2  
10.1002/14651858.CD011918.pub2  
10.1002/14651858.CD006868.pub3  
10.1002/14651858.CD011202.pub2  
10.1002/14651858.CD007238.pub2  
10.1002/14651858.CD009701.pub2  
10.1002/14651858.CD004075.pub4  
10.1002/14651858.CD000112.pub3  
10.1002/14651858.CD008825.pub2  
10.1002/14651858.CD010660.pub2  
10.1002/14651858.CD001807.pub2  
10.1002/14651858.CD010385.pub2  
10.1002/14651858.CD009708.pub2  
10.1002/14651858.CD007482.pub3  
10.1002/14651858.CD007772.pub3  
10.1002/14651858.CD007873.pub3  
10.1002/14651858.CD009394.pub2  
10.1002/14651858.CD004453.pub3  
10.1002/14651858.CD007715.pub2  
10.1002/14651858.CD006167.pub4  
10.1002/14651858.CD007123.pub3  
10.1002/14651858.CD009243.pub3  
10.1002/14651858.CD009241.pub3  
10.1002/14651858.CD006431.pub3  
10.1002/14651858.CD007201.pub3  
10.1002/14651858.CD005461.pub4  
10.1002/14651858.CD004074.pub3  
10.1002/14651858.CD008534.pub2

10.1002/14651858.CD000493.pub2  
10.1002/14651858.CD008982.pub2  
10.1002/14651858.CD006760.pub2  
10.1002/14651858.CD010088.pub2  
10.1002/14651858.CD003767.pub3  
10.1002/14651858.CD004665.pub3  
10.1002/14651858.CD008019.pub2  
10.1002/14651858.CD008580.pub2  
10.1002/14651858.CD003094.pub3  
10.1002/14651858.CD002256.pub2  
10.1002/14651858.CD004226.pub3  
10.1002/14651858.CD001337.pub2  
10.1002/14651858.CD000220.pub2  
10.1002/14651858.CD008410.pub2  
10.1002/14651858.CD006168.pub2  
10.1002/14651858.CD004908.pub2  
10.1002/14651858.CD006907.pub2  
10.1002/14651858.CD009215  
10.1002/14651858.CD009514  
10.1002/14651858.CD007559.pub2  
10.1002/14651858.CD005943.pub4  
10.1002/14651858.CD009232  
10.1002/14651858.CD009107.pub2  
10.1002/14651858.CD000013.pub2  
10.1002/14651858.CD004456.pub3  
10.1002/14651858.CD000331.pub3  
10.1002/14651858.CD009290.pub2  
10.1002/14651858.CD009037.pub2  
10.1002/14651858.CD005544.pub2  
10.1002/14651858.CD008679.pub2  
10.1002/14651858.CD009148.pub2  
10.1002/14651858.CD001233.pub2  
10.1002/14651858.CD006176.pub2  
10.1002/14651858.CD003928.pub3  
10.1002/14651858.CD003518.pub3  
10.1002/14651858.CD009200.pub2  
10.1002/14651858.CD008681.pub2  
10.1002/14651858.CD001064.pub2  
10.1002/14651858.CD005457.pub4  
10.1002/14651858.CD008510.pub2  
10.1002/14651858.CD001065.pub2  
10.1002/14651858.CD004945.pub3  
10.1002/14651858.CD001062.pub2



10.1002/14651858.CD009062.pub2  
10.1002/14651858.CD006304.pub3  
10.1002/14651858.CD007113.pub3  
10.1002/14651858.CD000108.pub2  
10.1002/14651858.CD009021.pub2  
10.1002/14651858.CD003248.pub3  
10.1002/14651858.CD007426.pub2  
10.1002/14651858.CD003517.pub2  
10.1002/14651858.CD000012.pub4  
10.1002/14651858.CD009223.pub2  
10.1002/14651858.CD006636.pub3  
10.1002/14651858.CD000004.pub2  
10.1002/14651858.CD008678.pub2  
10.1002/14651858.CD000176.pub2  
10.1002/14651858.CD005460.pub3  
10.1002/14651858.CD007096.pub3  
10.1002/14651858.CD000352.pub2  
10.1002/14651858.CD003397.pub2  
10.1002/14651858.CD000494.pub4  
10.1002/14651858.CD005937.pub3  
10.1002/14651858.CD000133.pub3  
10.1002/14651858.CD009351.pub2  
10.1002/14651858.CD007579.pub2  
10.1002/14651858.CD003401.pub3  
10.1002/14651858.CD007239.pub3  
10.1002/14651858.CD007748.pub2  
10.1002/14651858.CD004350.pub3  
10.1002/14651858.CD000051.pub2  
10.1002/14651858.CD000066.pub2  
10.1002/14651858.CD003577.pub3  
10.1002/14651858.CD000947.pub3  
10.1002/14651858.CD007885.pub2  
10.1002/14651858.CD000136.pub2  
10.1002/14651858.CD000114.pub2  
10.1002/14651858.CD007235.pub3  
10.1002/14651858.CD003927.pub3  
10.1002/14651858.CD000262.pub4  
10.1002/14651858.CD007707.pub2  
10.1002/14651858.CD005458.pub3  
10.1002/14651858.CD009395.pub2  
10.1002/14651858.CD009617.pub2  
10.1002/14651858.CD008611.pub2  
10.1002/14651858.CD006896.pub2

10.1002/14651858.CD008407.pub2  
10.1002/14651858.CD007623.pub3  
10.1002/14651858.CD001134.pub3  
10.1002/14651858.CD004351.pub3  
10.1002/14651858.CD007752.pub3  
10.1002/14651858.CD005123.pub3  
10.1002/14651858.CD000940.pub3  
10.1002/14651858.CD008635.pub2  
10.1002/14651858.CD000330.pub4  
10.1002/14651858.CD003099.pub2  
10.1002/14651858.CD006780.pub3  
10.1002/14651858.CD003106.pub2  
10.1002/14651858.CD009338.pub2  
10.1002/14651858.CD005627.pub3  
10.1002/14651858.CD010041.pub2  
10.1002/14651858.CD006795.pub3  
10.1002/14651858.CD006794.pub4  
10.1002/14651858.CD004947.pub3  
10.1002/14651858.CD003930.pub3  
10.1002/14651858.CD006764.pub3  
10.1002/14651858.CD010073.pub2  
10.1002/14651858.CD001449.pub3  
10.1002/14651858.CD000078.pub3  
10.1002/14651858.CD004907.pub3  
10.1002/14651858.CD010648.pub2  
10.1002/14651858.CD008977.pub2  
10.1002/14651858.CD009278.pub2  
10.1002/14651858.CD006947.pub3  
10.1002/14651858.CD008878.pub2  
10.1002/14651858.CD005938.pub3  
10.1002/14651858.CD009104.pub2  
10.1002/14651858.CD003934.pub4  
10.1002/14651858.CD001808.pub2  
10.1002/14651858.CD003096.pub2  
10.1002/14651858.CD010087.pub2  
10.1002/14651858.CD007372.pub3  
10.1002/14651858.CD003511.pub3  
10.1002/14651858.CD004071.pub3  
10.1002/14651858.CD009328.pub2  
10.1002/14651858.CD003396.pub2  
10.1002/14651858.CD000019.pub3  
10.1002/14651858.CD002963.pub2  
10.1002/14651858.CD000246.pub2

10.1002/14651858.CD002866.pub3  
10.1002/14651858.CD001058.pub3  
10.1002/14651858.CD004224.pub3  
10.1002/14651858.CD004068.pub4  
10.1002/14651858.CD002073.pub3  
10.1002/14651858.CD000014.pub4  
10.1002/14651858.CD006770.pub3  
10.1002/14651858.CD010441.pub2  
10.1002/14651858.CD003582.pub2  
10.1002/14651858.CD004352.pub3  
10.1002/14651858.CD009951.pub2  
10.1002/14651858.CD010800.pub2  
10.1002/14651858.CD002252.pub3  
10.1002/14651858.CD000942.pub3  
10.1002/14651858.CD007062.pub3  
10.1002/14651858.CD004943.pub4  
10.1002/14651858.CD003249.pub3  
10.1002/14651858.CD008053.pub3  
10.1002/14651858.CD000937.pub2  
10.1002/14651858.CD010312.pub2  
10.1002/14651858.CD010322.pub2  
10.1002/14651858.CD002860.pub2  
10.1002/14651858.CD008758.pub2  
10.1002/14651858.CD002255.pub2  
10.1002/14651858.CD004452.pub3  
10.1002/14651858.CD007467.pub4  
10.1002/14651858.CD003101.pub3  
10.1002/14651858.CD006169.pub2  
10.1002/14651858.CD004734.pub4  
10.1002/14651858.CD004732.pub3  
10.1002/14651858.CD001059.pub4  
10.1002/14651858.CD009166.pub2  
10.1002/14651858.CD001338.pub3  
10.1002/14651858.CD004070.pub3  
10.1002/14651858.CD001060.pub2  
10.1002/14651858.CD007462.pub3  
10.1002/14651858.CD005125.pub4  
10.1002/14651858.CD010209.pub2  
10.1002/14651858.CD000163.pub2  
10.1002/14651858.CD000203.pub3  
10.1002/14651858.CD000209.pub2  
10.1002/14651858.CD004718.pub3  
10.1002/14651858.CD006626.pub2

10.1002/14651858.CD006622.pub2  
10.1002/14651858.CD002831.pub2  
10.1002/14651858.CD004026.pub2  
10.1002/14651858.CD000381.pub3  
10.1002/14651858.CD007967.pub2  
10.1002/14651858.CD004162.pub2  
10.1002/14651858.CD000525.pub3  
10.1002/14651858.CD006374.pub2  
10.1002/14651858.CD008712.pub2  
10.1002/14651858.CD007198.pub2  
10.1002/14651858.CD001236.pub2  
10.1002/14651858.CD008296.pub2  
10.1002/14651858.CD009414.pub3  
10.1002/14651858.CD008016.pub2  
10.1002/14651858.CD009516.pub2  
10.1002/14651858.CD007892.pub5  
10.1002/14651858.CD010976.pub2  
10.1002/14651858.CD008726.pub2  
10.1002/14651858.CD009298.pub2  
10.1002/14651858.CD003520.pub3  
10.1002/14651858.CD007366.pub2  
10.1002/14651858.CD004903.pub4  
10.1002/14651858.CD008020.pub2  
10.1002/14651858.CD006178.pub3  
10.1002/14651858.CD007622.pub3  
10.1002/14651858.CD000230.pub5  
10.1002/14651858.CD000184.pub4  
10.1002/14651858.CD007079.pub3  
10.1002/14651858.CD000083.pub3  
10.1002/14651858.CD003581.pub3  
10.1002/14651858.CD007412.pub4  
10.1002/14651858.CD010450.pub2  
10.1002/14651858.CD007754.pub3  
10.1002/14651858.CD006174.pub3  
10.1002/14651858.CD010708.pub2  
10.1002/14651858.CD001450.pub4  
10.1002/14651858.CD000032.pub3  
10.1002/14651858.CD006965.pub4  
10.1002/14651858.CD009982.pub2  
10.1002/14651858.CD001992.pub3  
10.1002/14651858.CD000179.pub3  
10.1002/14651858.CD010762.pub2  
10.1002/14651858.CD001067.pub3

10.1002/14651858.CD005547.pub3  
10.1002/14651858.CD007872.pub3  
10.1002/14651858.CD011158.pub2  
10.1002/14651858.CD002250.pub3  
10.1002/14651858.CD001451.pub4  
10.1002/14651858.CD007145.pub3  
10.1002/14651858.CD003935.pub4  
10.1002/14651858.CD002959.pub4  
10.1002/14651858.CD007058.pub3  
10.1002/14651858.CD007901.pub3  
10.1002/14651858.CD000084.pub3  
10.1002/14651858.CD000166.pub2  
10.1002/14651858.CD000934.pub3  
10.1002/14651858.CD010085.pub2  
10.1002/14651858.CD010655.pub2  
10.1002/14651858.CD000490.pub3  
10.1002/14651858.CD007208.pub3  
10.1002/14651858.CD009279.pub3  
10.1002/14651858.CD011448.pub2  
10.1002/14651858.CD004069.pub3  
10.1002/14651858.CD000020.pub3  
10.1002/14651858.CD010490.pub2  
10.1002/14651858.CD008136.pub3  
10.1002/14651858.CD007863.pub4  
10.1002/14651858.CD010861.pub2  
10.1002/14651858.CD007575.pub4  
10.1002/14651858.CD011379.pub2  
10.1002/14651858.CD011263.pub2  
10.1002/14651858.CD011625.pub2  
10.1002/14651858.CD001066.pub3  
10.1002/14651858.CD002856.pub3  
10.1002/14651858.CD001139.pub4  
10.1002/14651858.CD004736.pub5  
10.1002/14651858.CD004909.pub3  
10.1002/14651858.CD006171.pub4  
10.1002/14651858.CD008666.pub3  
10.1002/14651858.CD010826.pub2  
10.1002/14651858.CD011445.pub2  
10.1002/14651858.CD009997.pub2  
10.1002/14651858.CD005300.pub4  
10.1002/14651858.CD004072.pub3  
10.1002/14651858.CD009954.pub2  
10.1002/14651858.CD000491.pub3

10.1002/14651858.CD007708.pub3  
10.1002/14651858.CD009433.pub2  
10.1002/14651858.CD008076.pub2  
10.1002/14651858.CD008186.pub2  
10.1002/14651858.CD007755.pub2  
10.1002/14651858.CD006609.pub2  
10.1002/14651858.CD007551.pub2  
10.1002/14651858.CD007039.pub2  
10.1002/14651858.CD002005.pub2  
10.1002/14651858.CD001719.pub4  
10.1002/14651858.CD009929.pub2  
10.1002/14651858.CD005950.pub4  
10.1002/14651858.CD009777.pub2  
10.1002/14651858.CD006391.pub2  
10.1002/14651858.CD003079.pub3  
10.1002/14651858.CD007815.pub2  
10.1002/14651858.CD005147.pub2  
10.1002/14651858.CD006352.pub2  
10.1002/14651858.CD001951.pub2  
10.1002/14651858.CD001711.pub2  
10.1002/14651858.CD008297.pub2  
10.1002/14651858.CD009531.pub2  
10.1002/14651858.CD009582.pub2  
10.1002/14651858.CD001949.pub3  
10.1002/14651858.CD006196.pub2  
10.1002/14651858.CD003082.pub3  
10.1002/14651858.CD006625.pub3  
10.1002/14651858.CD010226.pub2  
10.1002/14651858.CD002832.pub3  
10.1002/14651858.CD009802.pub2  
10.1002/14651858.CD000384.pub3  
10.1002/14651858.CD000284.pub3  
10.1002/14651858.CD008567.pub3  
10.1002/14651858.CD006569.pub5  
10.1002/14651858.CD009413.pub2  
10.1002/14651858.CD007479.pub2  
10.1002/14651858.CD007811.pub2  
10.1002/14651858.CD009960.pub2  
10.1002/14651858.CD001258.pub3  
10.1002/14651858.CD001470.pub2  
10.1002/14651858.CD009396.pub2  
10.1002/14651858.CD009268.pub2  
10.1002/14651858.CD009227.pub2

10.1002/14651858.CD009230.pub2  
10.1002/14651858.CD009369.pub2  
10.1002/14651858.CD004837.pub3  
10.1002/14651858.CD009928.pub2  
10.1002/14651858.CD005475.pub2  
10.1002/14651858.CD010501.pub2  
10.1002/14651858.CD010823.pub2  
10.1002/14651858.CD009831.pub2  
10.1002/14651858.CD009785.pub2  
10.1002/14651858.CD010540.pub2  
10.1002/14651858.CD000307.pub2  
10.1002/14651858.CD004716.pub4  
10.1002/14651858.CD009006.pub2  
10.1002/14651858.CD010554.pub2  
10.1002/14651858.CD006081.pub2  
10.1002/14651858.CD010598.pub2  
10.1002/14651858.CD003834.pub3  
10.1002/14651858.CD011458.pub2  
10.1002/14651858.CD003443.pub3  
10.1002/14651858.CD001087.pub5  
10.1002/14651858.CD006995.pub2  
10.1002/14651858.CD012122.pub2  
10.1002/14651858.CD008802.pub3  
10.1002/14651858.CD010832.pub2  
10.1002/14651858.CD008919.pub2  
10.1002/14651858.CD012029.pub2  
10.1002/14651858.CD004161.pub2  
10.1002/14651858.CD009830.pub2  
10.1002/14651858.CD010631.pub2  
10.1002/14651858.CD004028.pub4  
10.1002/14651858.CD009780.pub3  
10.1002/14651858.CD002830.pub3  
10.1002/14651858.CD005146.pub3  
10.1002/14651858.CD011464.pub2  
10.1002/14651858.CD011128.pub2  
10.1002/14651858.CD004408.pub5  
10.1002/14651858.CD006324.pub3  
10.1002/14651858.CD006918.pub3  
10.1002/14651858.CD011810.pub2  
10.1002/14651858.CD010006.pub2  
10.1002/14651858.CD007906.pub3  
10.1002/14651858.CD007778.pub2  
10.1002/14651858.CD011655.pub2

10.1002/14651858.CD004025.pub4  
10.1002/14651858.CD012217.pub2  
10.1002/14651858.CD011831.pub2  
10.1002/14651858.CD009005.pub2  
10.1002/14651858.CD012052.pub2  
10.1002/14651858.CD009377.pub3  
10.1002/14651858.CD011200.pub2  
10.1002/14651858.CD008925.pub2  
10.1002/14651858.CD010994.pub2  
10.1002/14651858.CD004733.pub4  
10.1002/14651858.CD009916.pub2  
10.1002/14651858.CD006553.pub3  
10.1002/14651858.CD011507.pub2  
10.1002/14651858.CD000116.pub5  
10.1002/14651858.CD010845.pub2  
10.1002/14651858.CD010568.pub2  
10.1002/14651858.CD004944.pub3  
10.1002/14651858.CD007950.pub3  
10.1002/14651858.CD008873.pub3  
10.1002/14651858.CD010647.pub2  
10.1002/14651858.CD005944.pub3  
10.1002/14651858.CD011624.pub2  
10.1002/14651858.CD011491.pub2  
10.1002/14651858.CD008540.pub4  
10.1002/14651858.CD010607.pub2  
10.1002/14651858.CD009356.pub3  
10.1002/14651858.CD005542.pub3  
10.1002/14651858.CD004073.pub4  
10.1002/14651858.CD004667.pub5  
10.1002/14651858.CD000938.pub2  
10.1002/14651858.CD011876.pub2  
10.1002/14651858.CD006946.pub3  
10.1002/14651858.CD010218.pub2  
10.1002/14651858.CD008968.pub3  
10.1002/14651858.CD008883.pub2  
10.1002/14651858.CD011622.pub2  
10.1002/14651858.CD006641.pub3  
10.1002/14651858.CD007202.pub4  
10.1002/14651858.CD011352.pub2  
10.1002/14651858.CD006462.pub4  
10.1002/14651858.CD012048.pub2  
10.1002/14651858.CD011562.pub2  
10.1002/14651858.CD006170.pub5



10.1002/14651858.CD010378.pub3  
10.1002/14651858.CD001688.pub3  
10.1002/14651858.CD006425.pub4  
10.1002/14651858.CD009273.pub2  
10.1002/14651858.CD005122.pub5  
10.1002/14651858.CD011967.pub2  
10.1002/14651858.CD006901.pub3  
10.1002/14651858.CD005302.pub3  
10.1002/14651858.CD006674.pub3  
10.1002/14651858.CD003519.pub4  
10.1002/14651858.CD011880.pub2  
10.1002/14651858.CD006066.pub3  
10.1002/14651858.CD007223.pub4  
10.1002/14651858.CD008070.pub3  
10.1002/14651858.CD000081.pub3  
10.1002/14651858.CD012129.pub2  
10.1002/14651858.CD008680.pub2  
10.1002/14651858.CD006172.pub4  
10.1002/14651858.CD012003.pub2  
10.1002/14651858.CD009275.pub3  
10.1002/14651858.CD012031.pub2  
10.1002/14651858.CD001141.pub5  
10.1002/14651858.CD006067.pub3  
10.1002/14651858.CD004735.pub4  
10.1002/14651858.CD000161.pub2  
10.1002/14651858.CD009124.pub3  
10.1002/14651858.CD011761.pub2  
10.1002/14651858.CD004454.pub3  
10.1002/14651858.CD011516.pub2  
10.1002/14651858.CD004905.pub5  
10.1002/14651858.CD011970.pub2  
10.1002/14651858.CD002006.pub4  
10.1002/14651858.CD008991.pub3  
10.1002/14651858.CD011989.pub2  
10.1002/14651858.CD009792.pub3  
10.1002/14651858.CD009613.pub3  
10.1002/14651858.CD012202.pub2  
10.1002/14651858.CD003766.pub6  
10.1002/14651858.CD009326.pub3  
10.1002/14651858.CD007529.pub4  
10.1002/14651858.CD004455.pub4  
10.1002/14651858.CD007222.pub4  
10.1002/14651858.CD007122.pub4

10.1002/14651858.CD007776.pub3  
10.1002/14651858.CD011192.pub2  
10.1002/14651858.CD002251.pub3  
10.1002/14651858.CD007701.pub3  
10.1002/14651858.CD009963.pub2  
10.1002/14651858.CD009382.pub2  
10.1002/14651858.CD010067.pub2  
10.1002/14651858.CD007825.pub6  
10.1002/14651858.CD008366.pub3  
10.1002/14651858.CD008657.pub2  
10.1002/14651858.CD001871.pub3  
10.1002/14651858.CD011247.pub2  
10.1002/14651858.CD009823.pub3  
10.1002/14651858.CD010697.pub2  
10.1002/14651858.CD011779.pub2  
10.1002/14651858.CD010321.pub2  
10.1002/14651858.CD010166.pub2  
10.1002/14651858.CD011683.pub2  
10.1002/14651858.CD009905.pub2  
10.1002/14651858.CD009467.pub2  
10.1002/14651858.CD010351.pub2  
10.1002/14651858.CD003261.pub3  
10.1002/14651858.CD010638.pub2  
10.1002/14651858.CD010522.pub2  
10.1002/14651858.CD009820.pub2  
10.1002/14651858.CD009542.pub2  
10.1002/14651858.CD009014.pub2  
10.1002/14651858.CD008711.pub3  
10.1002/14651858.CD000064.pub2  
10.1002/14651858.CD003435.pub2  
10.1002/14651858.CD009264.pub2  
10.1002/14651858.CD007230.pub2  
10.1002/14651858.CD008389.pub2  
10.1002/14651858.CD008530.pub2  
10.1002/14651858.CD008388.pub2  
10.1002/14651858.CD008179.pub2  
10.1002/14651858.CD000091.pub2  
10.1002/14651858.CD000419.pub3  
10.1002/14651858.CD009360.pub2  
10.1002/14651858.CD008354.pub2  
10.1002/14651858.CD006755.pub2  
10.1002/14651858.CD008449.pub2  
10.1002/14651858.CD001928.pub2

10.1002/14651858.CD001342.pub3  
10.1002/14651858.CD008348.pub3  
10.1002/14651858.CD008656.pub2  
10.1002/14651858.CD000323.pub2  
10.1002/14651858.CD001919.pub3  
10.1002/14651858.CD008184.pub2  
10.1002/14651858.CD000515.pub4  
10.1002/14651858.CD009286.pub2  
10.1002/14651858.CD002842.pub2  
10.1002/14651858.CD008862.pub2  
10.1002/14651858.CD008391.pub2  
10.1002/14651858.CD000514.pub3  
10.1002/14651858.CD008444.pub2  
10.1002/14651858.CD008728.pub2  
10.1002/14651858.CD004294.pub3  
10.1002/14651858.CD010116.pub2  
10.1002/14651858.CD005207.pub4  
10.1002/14651858.CD009689.pub2  
10.1002/14651858.CD008980.pub2  
10.1002/14651858.CD003586.pub3  
10.1002/14651858.CD001245.pub2  
10.1002/14651858.CD010255.pub2  
10.1002/14651858.CD000197.pub3  
10.1002/14651858.CD008357.pub2  
10.1002/14651858.CD000126.pub4  
10.1002/14651858.CD005346.pub4  
10.1002/14651858.CD005208.pub3  
10.1002/14651858.CD000029.pub3  
10.1002/14651858.CD009893.pub2  
10.1002/14651858.CD007890.pub3  
10.1002/14651858.CD007232.pub4  
10.1002/14651858.CD000103.pub2  
10.1002/14651858.CD000190.pub3  
10.1002/14651858.CD009103.pub2  
10.1002/14651858.CD001920.pub3  
10.1002/14651858.CD004954.pub3  
10.1002/14651858.CD000213.pub3  
10.1002/14651858.CD008349.pub3  
10.1002/14651858.CD000039.pub3  
10.1002/14651858.CD010200.pub2  
10.1002/14651858.CD009760.pub3  
10.1002/14651858.CD007028.pub3  
10.1002/14651858.CD000024.pub4

10.1002/14651858.CD009570.pub2  
10.1002/14651858.CD007030.pub3  
10.1002/14651858.CD011398.pub2  
10.1002/14651858.CD011138.pub2  
10.1002/14651858.CD009938.pub2  
10.1002/14651858.CD010693.pub3  
10.1002/14651858.CD004433.pub3  
10.1002/14651858.CD004955.pub3  
10.1002/14651858.CD008445.pub3  
10.1002/14651858.CD010882.pub2  
10.1002/14651858.CD006876.pub4  
10.1002/14651858.CD009645.pub3  
10.1002/14651858.CD009622.pub4  
10.1002/14651858.CD010442.pub2  
10.1002/14651858.CD002293.pub3  
10.1002/14651858.CD011401.pub2  
10.1002/14651858.CD004131.pub3  
10.1002/14651858.CD010362.pub2  
10.1002/14651858.CD000425.pub4  
10.1002/14651858.CD003316.pub6  
10.1002/14651858.CD002088.pub3  
10.1002/14651858.CD006073.pub3  
10.1002/14651858.CD011058.pub2  
10.1002/14651858.CD000119.pub4  
10.1002/14651858.CD006787.pub3  
10.1002/14651858.CD000398.pub2  
10.1002/14651858.CD007933.pub2  
10.1002/14651858.CD007026.pub5  
10.1002/14651858.CD007270.pub2  
10.1002/14651858.CD007961.pub2  
10.1002/14651858.CD011317.pub2  
10.1002/14651858.CD011701.pub2  
10.1002/14651858.CD010866.pub2  
10.1002/14651858.CD009036.pub2  
10.1002/14651858.CD010285.pub2  
10.1002/14651858.CD010684.pub2  
10.1002/14651858.CD008860.pub3  
10.1002/14651858.CD001081.pub3  
10.1002/14651858.CD002843.pub2  
10.1002/14651858.CD006185.pub4  
10.1002/14651858.CD007513.pub3  
10.1002/14651858.CD011968.pub2  
10.1002/14651858.CD012144.pub2

10.1002/14651858.CD000443.pub4  
10.1002/14651858.CD003585.pub3  
10.1002/14651858.CD012432.pub2  
10.1002/14651858.CD002840.pub4  
10.1002/14651858.CD011367.pub2  
10.1002/14651858.CD001080.pub2  
10.1002/14651858.CD006979.pub2  
10.1002/14651858.CD007374.pub2  
10.1002/14651858.CD001534.pub3  
10.1002/14651858.CD006023.pub2  
10.1002/14651858.CD007751.pub2  
10.1002/14651858.CD006124.pub2  
10.1002/14651858.CD003962.pub2  
10.1002/14651858.CD005279.pub4  
10.1002/14651858.CD007857.pub2  
10.1002/14651858.CD007016.pub2  
10.1002/14651858.CD006800.pub2  
10.1002/14651858.CD003964.pub3  
10.1002/14651858.CD003264.pub3  
10.1002/14651858.CD006943.pub2  
10.1002/14651858.CD008000.pub2  
10.1002/14651858.CD003236.pub2  
10.1002/14651858.CD006857.pub2  
10.1002/14651858.CD003265.pub3  
10.1002/14651858.CD005426.pub3  
10.1002/14651858.CD001321.pub5  
10.1002/14651858.CD008176.pub2  
10.1002/14651858.CD004136.pub3  
10.1002/14651858.CD005016.pub2  
10.1002/14651858.CD006740.pub2  
10.1002/14651858.CD007248.pub2  
10.1002/14651858.CD006182.pub2  
10.1002/14651858.CD003309.pub2  
10.1002/14651858.CD008308.pub2  
10.1002/14651858.CD003062.pub2  
10.1002/14651858.CD008309.pub2  
10.1002/14651858.CD007645.pub2  
10.1002/14651858.CD004214.pub4  
10.1002/14651858.CD002922.pub3  
10.1002/14651858.CD004213.pub3  
10.1002/14651858.CD004595.pub2  
10.1002/14651858.CD001817.pub2  
10.1002/14651858.CD007615.pub3

10.1002/14651858.CD003956.pub2  
10.1002/14651858.CD001453.pub2  
10.1002/14651858.CD007453.pub3  
10.1002/14651858.CD001452.pub4  
10.1002/14651858.CD001819.pub2  
10.1002/14651858.CD000512.pub2  
10.1002/14651858.CD003662.pub4  
10.1002/14651858.CD007969.pub2  
10.1002/14651858.CD004500.pub2  
10.1002/14651858.CD007966.pub2  
10.1002/14651858.CD003740.pub2  
10.1002/14651858.CD003065.pub2  
10.1002/14651858.CD001454.pub3  
10.1002/14651858.CD000510.pub2  
10.1002/14651858.CD005095.pub2  
10.1002/14651858.CD005257.pub3  
10.1002/14651858.CD003953.pub3  
10.1002/14651858.CD006818.pub2  
10.1002/14651858.CD004496.pub3  
10.1002/14651858.CD006817.pub3  
10.1002/14651858.CD007448.pub2  
10.1002/14651858.CD008310.pub2  
10.1002/14651858.CD004865.pub3  
10.1002/14651858.CD005249.pub2  
10.1002/14651858.CD001456.pub2  
10.1002/14651858.CD009017.pub2  
10.1002/14651858.CD003952.pub3  
10.1002/14651858.CD004950.pub3  
10.1002/14651858.CD004866.pub4  
10.1002/14651858.CD003487.pub3  
10.1002/14651858.CD003483.pub2  
10.1002/14651858.CD003311.pub3  
10.1002/14651858.CD003951.pub3  
10.1002/14651858.CD000504.pub4  
10.1002/14651858.CD006474.pub3  
10.1002/14651858.CD004591.pub3  
10.1002/14651858.CD003486.pub2  
10.1002/14651858.CD008771.pub2  
10.1002/14651858.CD000122.pub2  
10.1002/14651858.CD001691.pub3  
10.1002/14651858.CD007263.pub2  
10.1002/14651858.CD001073.pub2  
10.1002/14651858.CD000361.pub3

10.1002/14651858.CD005387.pub3  
10.1002/14651858.CD003959.pub3  
10.1002/14651858.CD005496.pub4  
10.1002/14651858.CD002971.pub3  
10.1002/14651858.CD004863.pub4  
10.1002/14651858.CD007805.pub2  
10.1002/14651858.CD004868.pub4  
10.1002/14651858.CD001145.pub3  
10.1002/14651858.CD001146.pub4  
10.1002/14651858.CD010018.pub2  
10.1002/14651858.CD000503.pub3  
10.1002/14651858.CD001970.pub5  
10.1002/14651858.CD002054.pub3  
10.1002/14651858.CD005947.pub4  
10.1002/14651858.CD000366.pub3  
10.1002/14651858.CD010333.pub2  
10.1002/14651858.CD004205.pub3  
10.1002/14651858.CD007835.pub2  
10.1002/14651858.CD010061.pub2  
10.1002/14651858.CD003481.pub6  
10.1002/14651858.CD001239.pub5  
10.1002/14651858.CD000104.pub4  
10.1002/14651858.CD003774.pub4  
10.1002/14651858.CD008817.pub2  
10.1002/14651858.CD008568.pub2  
10.1002/14651858.CD006861.pub3  
10.1002/14651858.CD008834.pub3  
10.1002/14651858.CD004925.pub3  
10.1002/14651858.CD005133.pub3  
10.1002/14651858.CD007594.pub3  
10.1002/14651858.CD004289.pub5  
10.1002/14651858.CD006335.pub3  
10.1002/14651858.CD005425.pub2  
10.1002/14651858.CD008597.pub2  
10.1002/14651858.CD002290.pub4  
10.1002/14651858.CD006022.pub4  
10.1002/14651858.CD008927.pub2  
10.1002/14651858.CD009297.pub2  
10.1002/14651858.CD008509.pub2  
10.1002/14651858.CD005019.pub4  
10.1002/14651858.CD008566.pub2  
10.1002/14651858.CD007004.pub3  
10.1002/14651858.CD005284.pub3

10.1002/14651858.CD003895.pub3  
10.1002/14651858.CD007034.pub3  
10.1002/14651858.CD007554.pub2  
10.1002/14651858.CD007333.pub2  
10.1002/14651858.CD009120.pub2  
10.1002/14651858.CD007784.pub2  
10.1002/14651858.CD003078.pub2  
10.1002/14651858.CD007669.pub2  
10.1002/14651858.CD006881.pub2  
10.1002/14651858.CD003772.pub4  
10.1002/14651858.CD009735.pub2  
10.1002/14651858.CD007861.pub2  
10.1002/14651858.CD008369.pub2  
10.1002/14651858.CD009535.pub2  
10.1002/14651858.CD004293.pub3  
10.1002/14651858.CD010699.pub2  
10.1002/14651858.CD006254.pub2  
10.1002/14651858.CD008353.pub2  
10.1002/14651858.CD010138.pub2  
10.1002/14651858.CD009403.pub2  
10.1002/14651858.CD010590.pub2  
10.1002/14651858.CD010070.pub2  
10.1002/14651858.CD010480.pub2  
10.1002/14651858.CD009534.pub2  
10.1002/14651858.CD007910.pub2  
10.1002/14651858.CD006819.pub2  
10.1002/14651858.CD001533.pub5  
10.1002/14651858.CD010446.pub2  
10.1002/14651858.CD006027.pub2  
10.1002/14651858.CD006258.pub2  
10.1002/14651858.CD010294.pub2  
10.1002/14651858.CD005128.pub3  
10.1002/14651858.CD010350.pub2  
10.1002/14651858.CD007013.pub2  
10.1002/14651858.CD007003.pub2  
10.1002/14651858.CD003965.pub2  
10.1002/14651858.CD009698.pub2  
10.1002/14651858.CD010057.pub2  
10.1002/14651858.CD003232.pub3  
10.1002/14651858.CD010481.pub2  
10.1002/14651858.CD008327.pub2  
10.1002/14651858.CD008772.pub2  
10.1002/14651858.CD010344.pub2



10.1002/14651858.CD010709.pub2  
10.1002/14651858.CD003266.pub3  
10.1002/14651858.CD009631.pub2  
10.1002/14651858.CD010737.pub2  
10.1002/14651858.CD006420.pub2  
10.1002/14651858.CD010741.pub2  
10.1002/14651858.CD010850.pub2  
10.1002/14651858.CD005282.pub3  
10.1002/14651858.CD004541.pub3  
10.1002/14651858.CD007746.pub2  
10.1002/14651858.CD010613.pub2  
10.1002/14651858.CD009440.pub2  
10.1002/14651858.CD010690.pub2  
10.1002/14651858.CD004683.pub4  
10.1002/14651858.CD011690.pub2  
10.1002/14651858.CD003594.pub5  
10.1002/14651858.CD004759.pub2  
10.1002/14651858.CD010777.pub2  
10.1002/14651858.CD011998.pub2  
10.1002/14651858.CD005632.pub3  
10.1002/14651858.CD004679.pub3  
10.1002/14651858.CD009966.pub2  
10.1002/14651858.CD004756.pub4  
10.1002/14651858.CD010137.pub2  
10.1002/14651858.CD006750.pub2  
10.1002/14651858.CD009904.pub2  
10.1002/14651858.CD005085.pub2  
10.1002/14651858.CD003600.pub3  
10.1002/14651858.CD004172.pub2  
10.1002/14651858.CD002041.pub3  
10.1002/14651858.CD001208.pub4  
10.1002/14651858.CD003985.pub3  
10.1002/14651858.CD008931.pub3  
10.1002/14651858.CD001886.pub4  
10.1002/14651858.CD001046.pub2  
10.1002/14651858.CD006676.pub3  
10.1002/14651858.CD001319.pub5  
10.1002/14651858.CD010245.pub2  
10.1002/14651858.CD005011.pub4  
10.1002/14651858.CD004609.pub3  
10.1002/14651858.CD000033.pub2  
10.1002/14651858.CD005014.pub3  
10.1002/14651858.CD007700.pub3

10.1002/14651858.CD008303.pub2  
10.1002/14651858.CD000567.pub6  
10.1002/14651858.CD006020.pub3  
10.1002/14651858.CD008481.pub2  
10.1002/14651858.CD010562.pub2  
10.1002/14651858.CD001049.pub5  
10.1002/14651858.CD010109.pub2  
10.1002/14651858.CD009331.pub2  
10.1002/14651858.CD002245.pub2  
10.1002/14651858.CD008507.pub2  
10.1002/14651858.CD008084.pub4  
10.1002/14651858.CD003109.pub3  
10.1002/14651858.CD009532.pub2  
10.1002/14651858.CD007379.pub2  
10.1002/14651858.CD011386.pub2  
10.1002/14651858.CD009457.pub2  
10.1002/14651858.CD004896.pub4  
10.1002/14651858.CD009177.pub2  
10.1002/14651858.CD009439.pub2  
10.1002/14651858.CD010801.pub2  
10.1002/14651858.CD004446.pub4  
10.1002/14651858.CD009330.pub2  
10.1002/14651858.CD009919.pub2  
10.1002/14651858.CD002043.pub3  
10.1002/14651858.CD010640.pub2  
10.1002/14651858.CD007383.pub3  
10.1002/14651858.CD009745.pub2  
10.1002/14651858.CD011588.pub2  
10.1002/14651858.CD009871.pub2  
10.1002/14651858.CD004170.pub3  
10.1002/14651858.CD010415.pub2  
10.1002/14651858.CD009228.pub3  
10.1002/14651858.CD002042.pub4  
10.1002/14651858.CD008409.pub4  
10.1002/14651858.CD011402.pub2  
10.1002/14651858.CD011020.pub2  
10.1002/14651858.CD010246.pub2  
10.1002/14651858.CD001884.pub3  
10.1002/14651858.CD010336.pub2  
10.1002/14651858.CD003669.pub2  
10.1002/14651858.CD008432.pub2  
10.1002/14651858.CD003743.pub2  
10.1002/14651858.CD005248.pub3

10.1002/14651858.CD002271.pub2  
10.1002/14651858.CD000144.pub3  
10.1002/14651858.CD009106.pub2  
10.1002/14651858.CD011078.pub2  
10.1002/14651858.CD010464.pub2  
10.1002/14651858.CD000437.pub3  
10.1002/14651858.CD004219.pub4  
10.1002/14651858.CD003478.pub5  
10.1002/14651858.CD009816.pub2  
10.1002/14651858.CD003850.pub5  
10.1002/14651858.CD003064.pub3  
10.1002/14651858.CD011724.pub2  
10.1002/14651858.CD001150.pub3  
10.1002/14651858.CD011484.pub2  
10.1002/14651858.CD010435.pub2  
10.1002/14651858.CD010249.pub2  
10.1002/14651858.CD009734.pub2  
10.1002/14651858.CD011493.pub2  
10.1002/14651858.CD006405.pub3  
10.1002/14651858.CD005495.pub4  
10.1002/14651858.CD011636.pub2  
10.1002/14651858.CD009172.pub2  
10.1002/14651858.CD001816.pub3  
10.1002/14651858.CD011082.pub2  
10.1002/14651858.CD001457.pub6  
10.1002/14651858.CD008313.pub3  
10.1002/14651858.CD011027.pub2  
10.1002/14651858.CD001240.pub3  
10.1002/14651858.CD011718.pub2  
10.1002/14651858.CD011877.pub2  
10.1002/14651858.CD011878.pub2  
10.1002/14651858.CD000343.pub3  
10.1002/14651858.CD010531.pub2  
10.1002/14651858.CD006982.pub4  
10.1002/14651858.CD001243.pub3  
10.1002/14651858.CD001069.pub5  
10.1002/14651858.CD002771.pub4  
10.1002/14651858.CD005092.pub3  
10.1002/14651858.CD005255.pub5  
10.1002/14651858.CD000501.pub4  
10.1002/14651858.CD000456.pub5  
10.1002/14651858.CD009720.pub2  
10.1002/14651858.CD007480.pub3

10.1002/14651858.CD005252.pub4  
10.1002/14651858.CD001071.pub3  
10.1002/14651858.CD011219.pub3  
10.1002/14651858.CD003668.pub4  
10.1002/14651858.CD003214.pub3  
10.1002/14651858.CD004696.pub5  
10.1002/14651858.CD005384.pub2  
10.1002/14651858.CD010112.pub2  
10.1002/14651858.CD000375.pub5  
10.1002/14651858.CD005091.pub4  
10.1002/14651858.CD000509.pub5  
10.1002/14651858.CD000399.pub3  
10.1002/14651858.CD001969.pub4  
10.1002/14651858.CD003059.pub3  
10.1002/14651858.CD004951.pub3  
10.1002/14651858.CD002052.pub3  
10.1002/14651858.CD010941.pub2  
10.1002/14651858.CD005389.pub2  
10.1002/14651858.CD003212.pub3  
10.1002/14651858.CD010331.pub2  
10.1002/14651858.CD003310.pub2  
10.1002/14651858.CD006980.pub3  
10.1002/14651858.CD008435.pub3  
10.1002/14651858.CD011065.pub2  
10.1002/14651858.CD000376.pub4  
10.1002/14651858.CD004339.pub4  
10.1002/14651858.CD000216.pub2  
10.1002/14651858.CD010332.pub2  
10.1002/14651858.CD011791.pub2  
10.1002/14651858.CD007137.pub5  
10.1002/14651858.CD006183.pub2  
10.1002/14651858.CD011190.pub2  
10.1002/14651858.CD012468.pub2  
10.1002/14651858.CD012362.pub2  
10.1002/14651858.CD011891.pub2  
10.1002/14651858.CD005494.pub4  
10.1002/14651858.CD004953.pub3  
10.1002/14651858.CD001241.pub7  
10.1002/14651858.CD002311.pub4  
10.1002/14651858.CD008050.pub2  
10.1002/14651858.CD003315.pub3  
10.1002/14651858.CD006205.pub3  
10.1002/14651858.CD007592.pub2

10.1002/14651858.CD004970.pub5  
10.1002/14651858.CD006386.pub3  
10.1002/14651858.CD008934.pub2  
10.1002/14651858.CD003814.pub2  
10.1002/14651858.CD000978.pub5  
10.1002/14651858.CD008829.pub2  
10.1002/14651858.CD006697.pub2  
10.1002/14651858.CD006963.pub2  
10.1002/14651858.CD006540.pub2  
10.1002/14651858.CD007261.pub2  
10.1002/14651858.CD003877.pub4  
10.1002/14651858.CD008948.pub2  
10.1002/14651858.CD005411.pub2  
10.1002/14651858.CD003811.pub2  
10.1002/14651858.CD004621.pub3  
10.1002/14651858.CD006968.pub2  
10.1002/14651858.CD008305.pub2  
10.1002/14651858.CD006383.pub2  
10.1002/14651858.CD008488.pub2  
10.1002/14651858.CD008288.pub2  
10.1002/14651858.CD006423.pub2  
10.1002/14651858.CD006165.pub3  
10.1002/14651858.CD005060.pub3  
10.1002/14651858.CD008101.pub2  
10.1002/14651858.CD007675.pub2  
10.1002/14651858.CD007845.pub3  
10.1002/14651858.CD007315.pub2  
10.1002/14651858.CD005449.pub2  
10.1002/14651858.CD009361.pub2  
10.1002/14651858.CD007170.pub2  
10.1002/14651858.CD008650.pub2  
10.1002/14651858.CD008381.pub2  
10.1002/14651858.CD008613.pub2  
10.1002/14651858.CD010223.pub2  
10.1002/14651858.CD008776.pub2  
10.1002/14651858.CD010063.pub2  
10.1002/14651858.CD007651.pub2  
10.1002/14651858.CD009560.pub2  
10.1002/14651858.CD009128.pub3  
10.1002/14651858.CD009518.pub2  
10.1002/14651858.CD010492.pub2  
10.1002/14651858.CD007469.pub2  
10.1002/14651858.CD009578.pub2

10.1002/14651858.CD004098.pub2  
10.1002/14651858.CD008066.pub3  
10.1002/14651858.CD003641.pub4  
10.1002/14651858.CD009122.pub2  
10.1002/14651858.CD007470.pub3  
10.1002/14651858.CD010370.pub2  
10.1002/14651858.CD010888.pub2  
10.1002/14651858.CD005525.pub3  
10.1002/14651858.CD010094.pub2  
10.1002/14651858.CD011740  
10.1002/14651858.CD012008  
10.1002/14651858.CD010576.pub2  
10.1002/14651858.CD012105  
10.1002/14651858.CD006424.pub3  
10.1002/14651858.CD011281.pub2  
10.1002/14651858.CD011361.pub2  
10.1002/14651858.CD012151.pub2  
10.1002/14651858.CD012204.pub2  
10.1002/14651858.CD012161  
10.1002/14651858.CD009840.pub2  
10.1002/14651858.CD006992.pub2  
10.1002/14651858.CD012691  
10.1002/14651858.CD011469.pub2  
10.1002/14651858.CD012436  
10.1002/14651858.CD012651  
10.1002/14651858.CD007795.pub2  
10.1002/14651858.CD003279.pub3  
10.1002/14651858.CD006981.pub2  
10.1002/14651858.CD007312.pub2  
10.1002/14651858.CD004156.pub4  
10.1002/14651858.CD009318.pub2  
10.1002/14651858.CD008496.pub2  
10.1002/14651858.CD009600  
10.1002/14651858.CD006283.pub3  
10.1002/14651858.CD001447.pub3  
10.1002/14651858.CD006281.pub4  
10.1002/14651858.CD004426.pub3  
10.1002/14651858.CD004157.pub2  
10.1002/14651858.CD006282.pub4  
10.1002/14651858.CD007543.pub2  
10.1002/14651858.CD009899  
10.1002/14651858.CD003643.pub4  
10.1002/14651858.CD010003

10.1002/14651858.CD002064.pub3  
10.1002/14651858.CD009402.pub2  
10.1002/14651858.CD002948.pub2  
10.1002/14651858.CD003525.pub2  
10.1002/14651858.CD000333.pub2  
10.1002/14651858.CD003113.pub3  
10.1002/14651858.CD008920.pub2  
10.1002/14651858.CD008886.pub2  
10.1002/14651858.CD008951.pub2  
10.1002/14651858.CD008872.pub2  
10.1002/14651858.CD008921.pub2  
10.1002/14651858.CD008922.pub2  
10.1002/14651858.CD009807  
10.1002/14651858.CD009147.pub2  
10.1002/14651858.CD006193.pub2  
10.1002/14651858.CD007323.pub3  
10.1002/14651858.CD007911.pub2  
10.1002/14651858.CD002277.pub4  
10.1002/14651858.CD005081.pub3  
10.1002/14651858.CD005225.pub3  
10.1002/14651858.CD005229.pub3  
10.1002/14651858.CD007963.pub2  
10.1002/14651858.CD005582.pub4  
10.1002/14651858.CD008554.pub3  
10.1002/14651858.CD009601.pub2  
10.1002/14651858.CD004760.pub4  
10.1002/14651858.CD003907.pub4  
10.1002/14651858.CD007468.pub3  
10.1002/14651858.CD008314.pub3  
10.1002/14651858.CD007796.pub3  
10.1002/14651858.CD010044.pub2  
10.1002/14651858.CD004029.pub4  
10.1002/14651858.CD001797.pub3  
10.1002/14651858.CD006832.pub3  
10.1002/14651858.CD006866.pub3  
10.1002/14651858.CD007115.pub3  
10.1002/14651858.CD008123.pub3  
10.1002/14651858.CD008265.pub2  
10.1002/14651858.CD002063.pub6  
10.1002/14651858.CD008602.pub3  
10.1002/14651858.CD006986.pub3  
10.1002/14651858.CD005228.pub4  
10.1002/14651858.CD007218.pub3

10.1002/14651858.CD003458.pub5  
10.1002/14651858.CD008953.pub2  
10.1002/14651858.CD010404.pub2  
10.1002/14651858.CD008146.pub2  
10.1002/14651858.CD001941.pub3  
10.1002/14651858.CD003217.pub5  
10.1002/14651858.CD009950.pub3  
10.1002/14651858.CD005044.pub3  
10.1002/14651858.CD005376.pub3  
10.1002/14651858.CD001869.pub8  
10.1002/14651858.CD003906.pub4  
10.1002/14651858.CD007818.pub3  
10.1002/14651858.CD001555.pub5  
10.1002/14651858.CD004303.pub4  
10.1002/14651858.CD011952  
10.1002/14651858.CD001942.pub5  
10.1002/14651858.CD007791.pub4  
10.1002/14651858.CD002827.pub4  
10.1002/14651858.CD003725.pub4  
10.1002/14651858.CD004158.pub3  
10.1002/14651858.CD006839.pub4  
10.1002/14651858.CD008630.pub4  
10.1002/14651858.CD001446.pub5  
10.1002/14651858.CD006978.pub2  
10.1002/14651858.CD006049.pub2  
10.1002/14651858.CD001798.pub3  
10.1002/14651858.CD010899.pub2  
10.1002/14651858.CD006521.pub4  
10.1002/14651858.CD003280.pub5  
10.1002/14651858.CD003726.pub4  
10.1002/14651858.CD012765  
10.1002/14651858.CD008653.pub2  
10.1002/14651858.CD008618.pub2  
10.1002/14651858.CD010292  
10.1002/14651858.CD002265.pub3  
10.1002/14651858.CD004524.pub4  
10.1002/14651858.CD000332.pub3  
10.1002/14651858.CD010039.pub2  
10.1002/14651858.CD007070.pub2  
10.1002/14651858.CD010538  
10.1002/14651858.CD000951.pub2  
10.1002/14651858.CD003686.pub2  
10.1002/14651858.CD008322.pub2



10.1002/14651858.CD004803.pub3  
10.1002/14651858.CD004525.pub2  
10.1002/14651858.CD003523.pub2  
10.1002/14651858.CD004260.pub3  
10.1002/14651858.CD010519.pub2  
10.1002/14651858.CD010884  
10.1002/14651858.CD008963.pub2  
10.1002/14651858.CD007912.pub2  
10.1002/14651858.CD003526.pub3  
10.1002/14651858.CD000957.pub2  
10.1002/14651858.CD009993.pub2  
10.1002/14651858.CD005117.pub3  
10.1002/14651858.CD002947.pub2  
10.1002/14651858.CD006190.pub2  
10.1002/14651858.CD011275  
10.1002/14651858.CD005467.pub2  
10.1002/14651858.CD003115.pub4  
10.1002/14651858.CD010156.pub2  
10.1002/14651858.CD010455.pub2  
10.1002/14651858.CD010120.pub2  
10.1002/14651858.CD011324  
10.1002/14651858.CD006077.pub3  
10.1002/14651858.CD010069.pub2  
10.1002/14651858.CD003528.pub2  
10.1002/14651858.CD004019.pub4  
10.1002/14651858.CD004376.pub3  
10.1002/14651858.CD003130.pub3  
10.1002/14651858.CD004800.pub3  
10.1002/14651858.CD010457.pub2  
10.1002/14651858.CD004020.pub3  
10.1002/14651858.CD011336  
10.1002/14651858.CD000518.pub2  
10.1002/14651858.CD001980.pub3  
10.1002/14651858.CD011735  
10.1002/14651858.CD005468.pub2  
10.1002/14651858.CD006349.pub2  
10.1002/14651858.CD007356.pub2  
10.1002/14651858.CD005614.pub2  
10.1002/14651858.CD010643.pub2  
10.1002/14651858.CD010952.pub2  
10.1002/14651858.CD005328.pub3  
10.1002/14651858.CD010143.pub2  
10.1002/14651858.CD005523.pub3

10.1002/14651858.CD008334.pub2  
10.1002/14651858.CD010203.pub2  
10.1002/14651858.CD010815.pub2  
10.1002/14651858.CD012225  
10.1002/14651858.CD001347.pub2  
10.1002/14651858.CD012224  
10.1002/14651858.CD010388.pub2  
10.1002/14651858.CD007455.pub3  
10.1002/14651858.CD012095.pub2  
10.1002/14651858.CD009865.pub2  
10.1002/14651858.CD012700  
10.1002/14651858.CD007649.pub4  
10.1002/14651858.CD007295.pub2  
10.1002/14651858.CD008386.pub3  
10.1002/14651858.CD007280.pub3  
10.1002/14651858.CD007621.pub2  
10.1002/14651858.CD005181.pub3  
10.1002/14651858.CD006921.pub3  
10.1002/14651858.CD004192.pub3  
10.1002/14651858.CD009974.pub2  
10.1002/14651858.CD002127.pub3  
10.1002/14651858.CD010475.pub2  
10.1002/14651858.CD009130.pub3  
10.1002/14651858.CD008933.pub2  
10.1002/14651858.CD008127.pub4  
10.1002/14651858.CD010242.pub2  
10.1002/14651858.CD008876.pub3  
10.1002/14651858.CD010508.pub2  
10.1002/14651858.CD008757.pub2  
10.1002/14651858.CD009131.pub3  
10.1002/14651858.CD011076.pub2  
10.1002/14651858.CD010422.pub2  
10.1002/14651858.CD009956.pub2  
10.1002/14651858.CD009882.pub3  
10.1002/14651858.CD011381.pub2  
10.1002/14651858.CD008754.pub3  
10.1002/14651858.CD011203.pub2  
10.1002/14651858.CD009371.pub2  
10.1002/14651858.CD009333.pub3  
10.1002/14651858.CD012200.pub2  
10.1002/14651858.CD007464.pub2  
10.1002/14651858.CD004282.pub3  
10.1002/14651858.CD002141.pub2

10.1002/14651858.CD009955.pub2  
10.1002/14651858.CD004284.pub3  
10.1002/14651858.CD009256.pub2  
10.1002/14651858.CD001991.pub3  
10.1002/14651858.CD001990.pub3  
10.1002/14651858.CD009948.pub2  
10.1002/14651858.CD002143.pub4  
10.1002/14651858.CD010355.pub2  
10.1002/14651858.CD011430  
10.1002/14651858.CD006849.pub3  
10.1002/14651858.CD010463.pub2  
10.1002/14651858.CD002142.pub4  
10.1002/14651858.CD012020.pub2  
10.1002/14651858.CD010383.pub2  
10.1002/14651858.CD011917.pub2  
10.1002/14651858.MR000031.pub2  
10.1002/14651858.MR000012.pub3  
10.1002/14651858.MR000027.pub2  
10.1002/14651858.MR000025.pub2  
10.1002/14651858.MR000024.pub3  
10.1002/14651858.MR000034.pub2  
10.1002/14651858.MR000022.pub3  
10.1002/14651858.MR000030.pub2  
10.1002/14651858.MR000035.pub2  
10.1002/14651858.MR000032.pub2  
10.1002/14651858.MR000036.pub2  
10.1002/14651858.MR000042.pub2  
10.1002/14651858.MR000043.pub2  
10.1002/14651858.MR000038.pub2  
10.1002/14651858.MR000033.pub3  
10.1002/14651858.CD005504.pub2  
10.1002/14651858.CD009097.pub2  
10.1002/14651858.CD006009.pub2  
10.1002/14651858.CD007834.pub2  
10.1002/14651858.CD002814.pub2  
10.1002/14651858.CD009646.pub2  
10.1002/14651858.CD002812.pub2  
10.1002/14651858.CD008624.pub3  
10.1002/14651858.CD002817.pub4  
10.1002/14651858.CD002815.pub2  
10.1002/14651858.CD005578.pub2  
10.1002/14651858.CD009681.pub2  
10.1002/14651858.CD007830.pub4

10.1002/14651858.CD010925.pub2  
10.1002/14651858.CD006941.pub2  
10.1002/14651858.CD004315.pub3  
10.1002/14651858.CD004552.pub2  
10.1002/14651858.CD010916.pub2  
10.1002/14651858.CD009682.pub2  
10.1002/14651858.CD004314.pub3  
10.1002/14651858.CD009684.pub2  
10.1002/14651858.CD009683.pub2  
10.1002/14651858.CD010760.pub2  
10.1002/14651858.CD007859.pub3  
10.1002/14651858.CD003808.pub3  
10.1002/14651858.CD003878.pub5  
10.1002/14651858.CD009378.pub2  
10.1002/14651858.CD006087.pub3  
10.1002/14651858.CD002279.pub2  
10.1002/14651858.CD004152.pub4  
10.1002/14651858.CD003603.pub3  
10.1002/14651858.CD009603.pub3  
10.1002/14651858.CD003813.pub4  
10.1002/14651858.CD003451.pub2  
10.1002/14651858.CD008375.pub2  
10.1002/14651858.CD004625.pub4  
10.1002/14651858.CD004150.pub4  
10.1002/14651858.CD003452.pub3  
10.1002/14651858.CD005516.pub2  
10.1002/14651858.CD004624.pub2  
10.1002/14651858.CD003809.pub3  
10.1002/14651858.CD010514.pub2  
10.1002/14651858.CD004346.pub4  
10.1002/14651858.CD009857.pub2  
10.1002/14651858.CD005620.pub2  
10.1002/14651858.CD005293.pub2  
10.1002/14651858.CD000979.pub2  
10.1002/14651858.CD010136.pub2  
10.1002/14651858.CD008397.pub2  
10.1002/14651858.CD004345.pub2  
10.1002/14651858.CD003220.pub2  
10.1002/14651858.CD003815.pub4  
10.1002/14651858.CD002281.pub3  
10.1002/14651858.CD005515.pub3  
10.1002/14651858.CD005098.pub3  
10.1002/14651858.CD005101.pub3

10.1002/14651858.CD008694.pub2  
10.1002/14651858.CD009742.pub2  
10.1002/14651858.CD010470.pub2  
10.1002/14651858.CD010743.pub2  
10.1002/14651858.CD011018.pub2  
10.1002/14651858.CD008457.pub2  
10.1002/14651858.CD004622.pub3  
10.1002/14651858.CD010176.pub2  
10.1002/14651858.CD010572.pub2  
10.1002/14651858.CD003876.pub4  
10.1002/14651858.CD002280.pub2  
10.1002/14651858.CD009109.pub3  
10.1002/14651858.CD011116.pub2  
10.1002/14651858.CD010431.pub2  
10.1002/14651858.CD010887.pub2  
10.1002/14651858.CD010856.pub2  
10.1002/14651858.CD004714.pub3  
10.1002/14651858.CD010341.pub2  
10.1002/14651858.CD005512.pub3  
10.1002/14651858.CD011552.pub2  
10.1002/14651858.CD004969.pub4  
10.1002/14651858.CD003067.pub4  
10.1002/14651858.CD002283.pub4  
10.1002/14651858.CD007517.pub3  
10.1002/14651858.CD008455.pub2  
10.1002/14651858.CD011784.pub2  
10.1002/14651858.CD008392.pub3  
10.1002/14651858.CD003879.pub4  
10.1002/14651858.CD009858.pub2  
10.1002/14651858.CD002284.pub2  
10.1002/14651858.CD001829.pub4  
10.1002/14651858.CD010535.pub2  
10.1002/14651858.CD010403.pub2  
10.1002/14651858.CD005520.pub3  
10.1002/14651858.CD004485.pub4  
10.1002/14651858.CD010526.pub2  
10.1002/14651858.CD010229.pub2  
10.1002/14651858.CD005511.pub3  
10.1002/14651858.CD008367.pub3  
10.1002/14651858.CD005517.pub2  
10.1002/14651858.CD005296.pub3  
10.1002/14651858.CD002779.pub3  
10.1002/14651858.CD008236.pub3

10.1002/14651858.CD010263.pub2  
10.1002/14651858.CD005297.pub3  
10.1002/14651858.CD006966.pub3  
10.1002/14651858.CD006204.pub3  
10.1002/14651858.CD008676.pub2  
10.1002/14651858.CD012744  
10.1002/14651858.CD001830.pub5  
10.1002/14651858.CD007556.pub2  
10.1002/14651858.CD007553.pub2  
10.1002/14651858.CD007519.pub2  
10.1002/14651858.CD009183.pub2  
10.1002/14651858.CD007132.pub2  
10.1002/14651858.CD009664  
10.1002/14651858.CD009007.pub2  
10.1002/14651858.CD009663  
10.1002/14651858.CD006276.pub3  
10.1002/14651858.CD008615.pub2  
10.1002/14651858.CD009665  
10.1002/14651858.CD007544.pub2  
10.1002/14651858.CD002067.pub2  
10.1002/14651858.CD008943.pub2  
10.1002/14651858.CD010111  
10.1002/14651858.CD004770.pub2  
10.1002/14651858.CD008025.pub2  
10.1002/14651858.CD008768.pub2  
10.1002/14651858.CD006145.pub3  
10.1002/14651858.CD008411.pub2  
10.1002/14651858.CD007407.pub3  
10.1002/14651858.CD008041.pub3  
10.1002/14651858.CD001792.pub3  
10.1002/14651858.CD008783.pub3  
10.1002/14651858.CD008039.pub3  
10.1002/14651858.CD004310.pub3  
10.1002/14651858.CD008040.pub3  
10.1002/14651858.CD005539.pub2  
10.1002/14651858.CD010609  
10.1002/14651858.CD010210.pub2  
10.1002/14651858.CD010608  
10.1002/14651858.CD010289.pub2  
10.1002/14651858.CD007760.pub2  
10.1002/14651858.CD010611  
10.1002/14651858.CD004844.pub3  
10.1002/14651858.CD006146.pub2

10.1002/14651858.CD010610  
10.1002/14651858.CD009796.pub2  
10.1002/14651858.CD010270.pub2  
10.1002/14651858.CD008307.pub2  
10.1002/14651858.CD009455.pub2  
10.1002/14651858.CD004233.pub4  
10.1002/14651858.CD007550.pub3  
10.1002/14651858.CD005179.pub3  
10.1002/14651858.CD009688.pub2  
10.1002/14651858.CD006044.pub4  
10.1002/14651858.CD008042.pub3  
10.1002/14651858.CD006273.pub3  
10.1002/14651858.CD002918.pub3  
10.1002/14651858.CD004309.pub4  
10.1002/14651858.CD010152.pub2  
10.1002/14651858.CD005451.pub3  
10.1002/14651858.CD003968.pub4  
10.1002/14651858.CD008208.pub3  
10.1002/14651858.CD010769.pub2  
10.1002/14651858.CD008616.pub2  
10.1002/14651858.CD010943.pub2  
10.1002/14651858.CD010958.pub2  
10.1002/14651858.CD007533.pub3  
10.1002/14651858.CD011056.pub2  
10.1002/14651858.CD009583.pub2  
10.1002/14651858.CD011003.pub2  
10.1002/14651858.CD006601.pub4  
10.1002/14651858.CD005622.pub4  
10.1002/14651858.CD007403.pub3  
10.1002/14651858.CD009281.pub3  
10.1002/14651858.CD010206.pub2  
10.1002/14651858.CD011209.pub2  
10.1002/14651858.CD010937.pub2  
10.1002/14651858.CD011241.pub2  
10.1002/14651858.CD010107.pub3  
10.1002/14651858.CD011404.pub2  
10.1002/14651858.CD010750.pub2  
10.1002/14651858.CD009574.pub2  
10.1002/14651858.CD011118.pub2  
10.1002/14651858.CD002919.pub3  
10.1002/14651858.CD002286.pub3  
10.1002/14651858.CD009596.pub4  
10.1002/14651858.CD010756.pub2

10.1002/14651858.CD009660.pub3  
10.1002/14651858.CD003448.pub4  
10.1002/14651858.CD007771.pub3  
10.1002/14651858.CD008408.pub3  
10.1002/14651858.CD011681  
10.1002/14651858.CD009923.pub2  
10.1002/14651858.CD007881.pub3  
10.1002/14651858.CD006788.pub3  
10.1002/14651858.CD003348.pub3  
10.1002/14651858.CD009389.pub3  
10.1002/14651858.CD007402.pub3  
10.1002/14651858.CD006142.pub3  
10.1002/14651858.CD011789  
10.1002/14651858.CD010720.pub2  
10.1002/14651858.CD011509.pub2  
10.1002/14651858.CD007887.pub3  
10.1002/14651858.CD011824  
10.1002/14651858.CD011474.pub2  
10.1002/14651858.CD004768.pub3  
10.1002/14651858.CD008242.pub3  
10.1002/14651858.CD011091.pub2  
10.1002/14651858.CD009509.pub3  
10.1002/14651858.CD011460.pub2  
10.1002/14651858.CD006716.pub3  
10.1002/14651858.CD003782.pub3  
10.1002/14651858.CD010967.pub2  
10.1002/14651858.CD007753.pub3  
10.1002/14651858.CD011259.pub2  
10.1002/14651858.CD008244.pub3  
10.1002/14651858.CD010902.pub2  
10.1002/14651858.CD006271.pub3  
10.1002/14651858.CD005219.pub3  
10.1002/14651858.CD002764.pub2  
10.1002/14651858.CD008006.pub4  
10.1002/14651858.CD005540.pub3  
10.1002/14651858.CD009199.pub3  
10.1002/14651858.CD006275.pub3  
10.1002/14651858.CD011131.pub2  
10.1002/14651858.CD011008.pub2  
10.1002/14651858.CD010853.pub2  
10.1002/14651858.CD005220.pub2  
10.1002/14651858.CD007587.pub2  
10.1002/14651858.CD011421.pub2



10.1002/14651858.CD008541.pub3  
10.1002/14651858.CD003868.pub4  
10.1002/14651858.CD008918.pub2  
10.1002/14651858.CD007400.pub3  
10.1002/14651858.CD011604.pub2  
10.1002/14651858.CD011804.pub2  
10.1002/14651858.CD009873.pub3  
10.1002/14651858.CD010529.pub2  
10.1002/14651858.CD007126.pub3  
10.1002/14651858.CD011694.pub2  
10.1002/14651858.CD001218.pub3  
10.1002/14651858.CD011889.pub2  
10.1002/14651858.CD010692.pub3  
10.1002/14651858.CD011476.pub2  
10.1002/14651858.CD004598.pub4  
10.1002/14651858.CD012190.pub2  
10.1002/14651858.CD012232.pub2  
10.1002/14651858.CD011108.pub2  
10.1002/14651858.CD011790.pub2  
10.1002/14651858.CD011605.pub2  
10.1002/14651858.CD009419.pub3  
10.1002/14651858.CD006380.pub3  
10.1002/14651858.CD007354.pub3  
10.1002/14651858.CD011248.pub2  
10.1002/14651858.CD012188.pub2  
10.1002/14651858.CD003971.pub4  
10.1002/14651858.CD008144.pub2  
10.1002/14651858.CD011888.pub2  
10.1002/14651858.CD007393.pub4  
10.1002/14651858.CD011419.pub2  
10.1002/14651858.CD008320.pub3  
10.1002/14651858.CD012332.pub2  
10.1002/14651858.CD012508.pub2  
10.1002/14651858.CD012499.pub2  
10.1002/14651858.CD011669.pub2  
10.1002/14651858.CD007355.pub3  
10.1002/14651858.CD012002.pub2  
10.1002/14651858.CD003351.pub3  
10.1002/14651858.CD007938.pub4  
10.1002/14651858.CD012638.pub2  
10.1002/14651858.CD012637.pub2  
10.1002/14651858.CD009984.pub3  
10.1002/14651858.CD012030.pub2

10.1002/14651858.CD012537.pub2  
10.1002/14651858.CD012536.pub2  
10.1002/14651858.CD012051.pub2  
10.1002/14651858.CD012535.pub2  
10.1002/14651858.CD011976.pub2  
10.1002/14651858.CD003870.pub6  
10.1002/14651858.CD009595.pub2  
10.1002/14651858.CD008160.pub2  
10.1002/14651858.CD008938.pub2  
10.1002/14651858.CD010026.pub2  
10.1002/14651858.CD005055.pub3  
10.1002/14651858.CD010555.pub2  
10.1002/14651858.CD010357.pub2  
10.1002/14651858.CD009176.pub2  
10.1002/14651858.CD002788.pub3  
10.1002/14651858.CD009161.pub2  
10.1002/14651858.CD008638.pub2  
10.1002/14651858.CD009901.pub2  
10.1002/14651858.CD005277.pub3  
10.1002/14651858.CD007274.pub2  
10.1002/14651858.CD008343.pub2  
10.1002/14651858.CD007598.pub2  
10.1002/14651858.CD003590.pub4  
10.1002/14651858.CD006616.pub2  
10.1002/14651858.CD007105.pub2  
10.1002/14651858.CD004958.pub2  
10.1002/14651858.CD008112.pub2  
10.1002/14651858.CD004919.pub2  
10.1002/14651858.CD004084.pub3  
10.1002/14651858.CD007119.pub2  
10.1002/14651858.CD008257.pub2  
10.1002/14651858.CD008402.pub2  
10.1002/14651858.CD005958.pub3  
10.1002/14651858.CD006717.pub2  
10.1002/14651858.CD005106.pub4  
10.1002/14651858.CD004871.pub4  
10.1002/14651858.CD008880.pub2  
10.1002/14651858.CD009565.pub2  
10.1002/14651858.CD008326.pub2  
10.1002/14651858.CD003010.pub5  
10.1002/14651858.CD004251.pub5  
10.1002/14651858.CD004959.pub4  
10.1002/14651858.CD010712

10.1002/14651858.CD001822.pub3  
10.1002/14651858.CD009644.pub2  
10.1002/14651858.CD004360.pub4  
10.1002/14651858.CD004082.pub5  
10.1002/14651858.CD003845.pub3  
10.1002/14651858.CD003844.pub4  
10.1002/14651858.CD004388.pub6  
10.1002/14651858.CD003408.pub3  
10.1002/14651858.CD009098.pub2  
10.1002/14651858.CD008863.pub2  
10.1002/14651858.CD006908.pub2  
10.1002/14651858.CD006715.pub2  
10.1002/14651858.CD009971.pub2  
10.1002/14651858.CD006313.pub3  
10.1002/14651858.CD003707.pub3  
10.1002/14651858.CD004087.pub2  
10.1002/14651858.CD003591.pub3  
10.1002/14651858.CD007083.pub3  
10.1002/14651858.CD009082.pub2  
10.1002/14651858.CD005487.pub3  
10.1002/14651858.CD008864.pub2  
10.1002/14651858.CD010160.pub2  
10.1002/14651858.CD005056.pub3  
10.1002/14651858.CD001090.pub2  
10.1002/14651858.CD004127.pub3  
10.1002/14651858.CD010320.pub2  
10.1002/14651858.CD009798.pub2  
10.1002/14651858.CD010105.pub2  
10.1002/14651858.CD009784.pub2  
10.1002/14651858.CD003344.pub3  
10.1002/14651858.CD007080.pub2  
10.1002/14651858.CD009633.pub2  
10.1002/14651858.CD006058.pub3  
10.1002/14651858.CD009015.pub2  
10.1002/14651858.CD008639.pub2  
10.1002/14651858.CD002013.pub3  
10.1002/14651858.CD009763.pub2  
10.1002/14651858.CD007364.pub2  
10.1002/14651858.CD009908.pub2  
10.1002/14651858.CD006056.pub2  
10.1002/14651858.CD009235.pub3  
10.1002/14651858.CD009941.pub2  
10.1002/14651858.CD007922.pub3

10.1002/14651858.CD003843.pub3  
10.1002/14651858.CD009169.pub2  
10.1002/14651858.CD003007.pub3  
10.1002/14651858.CD004504.pub4  
10.1002/14651858.CD000963.pub3  
10.1002/14651858.CD010328.pub2  
10.1002/14651858.CD010387.pub2  
10.1002/14651858.CD010664.pub2  
10.1002/14651858.CD004250.pub5  
10.1002/14651858.CD010036.pub2  
10.1002/14651858.CD001929.pub3  
10.1002/14651858.CD010264.pub2  
10.1002/14651858.CD008572.pub2  
10.1002/14651858.CD010513.pub2  
10.1002/14651858.CD012087  
10.1002/14651858.CD004249.pub4  
10.1002/14651858.CD012085  
10.1002/14651858.CD012004  
10.1002/14651858.CD008325.pub2  
10.1002/14651858.CD009772.pub2  
10.1002/14651858.CD012421  
10.1002/14651858.CD011674.pub2  
10.1002/14651858.CD002193.pub2  
10.1002/14651858.CD010671.pub2  
10.1002/14651858.CD010050.pub2  
10.1002/14651858.CD009942.pub2  
10.1002/14651858.CD007084.pub2  
10.1002/14651858.CD004476.pub2  
10.1002/14651858.CD009892.pub2  
10.1002/14651858.CD010468.pub2  
10.1002/14651858.CD008877.pub2  
10.1002/14651858.CD006904.pub3  
10.1002/14651858.CD006902.pub3  
10.1002/14651858.CD009771.pub2  
10.1002/14651858.CD010225.pub2  
10.1002/14651858.CD010269.pub2  
10.1002/14651858.CD011447  
10.1002/14651858.CD010381.pub2  
10.1002/14651858.CD006638.pub3  
10.1002/14651858.CD007271.pub3  
10.1002/14651858.CD006962.pub2  
10.1002/14651858.CD008807.pub2  
10.1002/14651858.CD010645.pub2

10.1002/14651858.CD009852.pub2  
10.1002/14651858.CD010824.pub2  
10.1002/14651858.CD004083.pub3  
10.1002/14651858.CD009861.pub2  
10.1002/14651858.CD008632.pub2  
10.1002/14651858.CD009891.pub2  
10.1002/14651858.CD008884.pub2  
10.1002/14651858.CD004081.pub3  
10.1002/14651858.CD006447.pub3  
10.1002/14651858.CD007082.pub2  
10.1002/14651858.CD009201.pub2  
10.1002/14651858.CD011107.pub2  
10.1002/14651858.CD007399.pub2  
10.1002/14651858.CD009642.pub2  
10.1002/14651858.CD003703.pub3  
10.1002/14651858.CD006291.pub3  
10.1002/14651858.CD010278.pub2  
10.1002/14651858.CD006459.pub3  
10.1002/14651858.CD009134.pub2  
10.1002/14651858.CD010106.pub2  
10.1002/14651858.CD010356.pub2  
10.1002/14651858.CD008808.pub2  
10.1002/14651858.CD001021.pub2  
10.1002/14651858.CD003429.pub4  
10.1002/14651858.CD002008.pub4  
10.1002/14651858.CD008294.pub4  
10.1002/14651858.CD002767.pub2  
10.1002/14651858.CD002203.pub4  
10.1002/14651858.CD008319.pub2  
10.1002/14651858.CD001507.pub3  
10.1002/14651858.CD007639.pub2  
10.1002/14651858.CD009415.pub2  
10.1002/14651858.CD008037.pub3  
10.1002/14651858.CD007168.pub3  
10.1002/14651858.CD006112.pub3  
10.1002/14651858.CD003884.pub4  
10.1002/14651858.CD001753.pub3  
10.1002/14651858.CD009448.pub2  
10.1002/14651858.CD004839.pub3  
10.1002/14651858.CD002010.pub4  
10.1002/14651858.CD004450.pub3  
10.1002/14651858.CD005087.pub4  
10.1002/14651858.CD010561.pub2

10.1002/14651858.CD007298.pub4  
10.1002/14651858.CD007477.pub3  
10.1002/14651858.CD008190.pub2  
10.1002/14651858.CD007020.pub3  
10.1002/14651858.CD007641.pub3  
10.1002/14651858.CD003148.pub3  
10.1002/14651858.CD001918.pub3  
10.1002/14651858.CD009961.pub2  
10.1002/14651858.CD004731.pub4  
10.1002/14651858.CD010297.pub2  
10.1002/14651858.CD010893.pub2  
10.1002/14651858.CD010324.pub2  
10.1002/14651858.CD009841.pub2  
10.1002/14651858.CD008005.pub4  
10.1002/14651858.CD004448.pub5  
10.1002/14651858.CD001916.pub3  
10.1002/14651858.CD008901.pub3  
10.1002/14651858.CD009191.pub3  
10.1002/14651858.CD008253.pub4  
10.1002/14651858.CD001914.pub2  
10.1002/14651858.CD003147.pub4  
10.1002/14651858.CD009730.pub2  
10.1002/14651858.CD008191.pub2  
10.1002/14651858.CD008068.pub2  
10.1002/14651858.CD007546.pub2  
10.1002/14651858.CD007220.pub2  
10.1002/14651858.CD002955.pub4  
10.1002/14651858.CD005379.pub3  
10.1002/14651858.CD006504.pub2  
10.1002/14651858.CD009425.pub2  
10.1002/14651858.CD005562.pub2  
10.1002/14651858.CD006378.pub2  
10.1002/14651858.CD006929.pub2  
10.1002/14651858.CD009132.pub2  
10.1002/14651858.CD008634.pub2  
10.1002/14651858.CD004744.pub3  
10.1002/14651858.CD008900.pub2  
10.1002/14651858.CD004033.pub3  
10.1002/14651858.CD007726.pub2  
10.1002/14651858.CD003260.pub2  
10.1002/14651858.CD004396.pub3  
10.1002/14651858.CD009125.pub2  
10.1002/14651858.CD009537.pub2

10.1002/14651858.CD003150.pub2  
10.1002/14651858.CD003946.pub4  
10.1002/14651858.CD005380.pub5  
10.1002/14651858.CD007514.pub3  
10.1002/14651858.CD009126.pub2  
10.1002/14651858.CD009444.pub3  
10.1002/14651858.CD008345.pub2  
10.1002/14651858.CD009524.pub2  
10.1002/14651858.CD006489.pub4  
10.1002/14651858.CD005381.pub4  
10.1002/14651858.CD010033.pub2  
10.1002/14651858.CD010569.pub2  
10.1002/14651858.CD009221.pub2  
10.1002/14651858.CD001191.pub4  
10.1002/14651858.CD003160.pub3  
10.1002/14651858.CD009002.pub3  
10.1002/14651858.CD011971.pub2  
10.1002/14651858.CD011513.pub2  
10.1002/14651858.CD009178.pub3  
10.1002/14651858.CD005563.pub3  
10.1002/14651858.CD009374.pub3  
10.1002/14651858.CD011882.pub2  
10.1002/14651858.CD002854.pub5  
10.1002/14651858.CD003804.pub2  
10.1002/14651858.CD003477.pub3  
10.1002/14651858.CD004615.pub3  
10.1002/14651858.CD007296.pub2  
10.1002/14651858.CD006688.pub2  
10.1002/14651858.CD006689.pub2  
10.1002/14651858.CD008603.pub2  
10.1002/14651858.CD003754.pub3  
10.1002/14651858.CD006591.pub2  
10.1002/14651858.CD004530.pub4  
10.1002/14651858.CD002151.pub2  
10.1002/14651858.CD003756.pub4  
10.1002/14651858.CD005967.pub4  
10.1002/14651858.CD007179.pub2  
10.1002/14651858.CD009527.pub2  
10.1002/14651858.CD008300.pub2  
10.1002/14651858.CD001167.pub2  
10.1002/14651858.CD006201.pub3  
10.1002/14651858.CD007787.pub2  
10.1002/14651858.CD004795.pub4

10.1002/14651858.CD000528.pub2  
10.1002/14651858.CD008521.pub3  
10.1002/14651858.CD007401.pub3  
10.1002/14651858.CD009029.pub2  
10.1002/14651858.CD009572.pub2  
10.1002/14651858.CD008492.pub3  
10.1002/14651858.CD007545.pub2  
10.1002/14651858.CD005433.pub2  
10.1002/14651858.CD008923.pub2  
10.1002/14651858.CD004389.pub3  
10.1002/14651858.CD008090.pub2  
10.1002/14651858.CD001261.pub3  
10.1002/14651858.CD008846.pub2  
10.1002/14651858.CD007953.pub2  
10.1002/14651858.CD010927  
10.1002/14651858.CD006404.pub2  
10.1002/14651858.CD008998.pub2  
10.1002/14651858.CD009964.pub2  
10.1002/14651858.CD003488.pub3  
10.1002/14651858.CD008625.pub2  
10.1002/14651858.CD010678.pub2  
10.1002/14651858.CD000169.pub3  
10.1002/14651858.CD011370  
10.1002/14651858.CD010767.pub2  
10.1002/14651858.CD006594.pub3  
10.1002/14651858.CD000053.pub3  
10.1002/14651858.CD011547  
10.1002/14651858.CD008152.pub4  
10.1002/14651858.CD010458.pub2  
10.1002/14651858.CD003343.pub4  
10.1002/14651858.CD004265.pub3  
10.1002/14651858.CD007952.pub3  
10.1002/14651858.CD007745.pub3  
10.1002/14651858.CD000371.pub6  
10.1002/14651858.CD004794.pub3  
10.1002/14651858.CD006419.pub4  
10.1002/14651858.CD002244.pub4  
10.1002/14651858.CD006589.pub4  
10.1002/14651858.CD009913.pub2  
10.1002/14651858.CD012163.pub2  
10.1002/14651858.CD006086.pub4  
10.1002/14651858.CD012091.pub2  
10.1002/14651858.CD006417.pub3



10.1002/14651858.CD008824.pub2  
10.1002/14651858.CD004246.pub4  
10.1002/14651858.CD006519.pub3  
10.1002/14651858.CD001876.pub3  
10.1002/14651858.CD010806.pub2  
10.1002/14651858.CD009818.pub2  
10.1002/14651858.CD005436.pub5  
10.1002/14651858.CD006418.pub3  
10.1002/14651858.CD003650.pub4  
10.1002/14651858.CD011656.pub2  
10.1002/14651858.CD008984.pub2  
10.1002/14651858.CD003281.pub4  
10.1002/14651858.CD005059.pub4  
10.1002/14651858.CD009634.pub2  
10.1002/14651858.CD008095.pub2  
10.1002/14651858.CD011151.pub2  
10.1002/14651858.CD004920.pub3  
10.1002/14651858.CD002243.pub3  
10.1002/14651858.CD009210.pub2  
10.1002/14651858.CD005370.pub3  
10.1002/14651858.CD009346.pub2  
10.1002/14651858.CD004128.pub4  
10.1002/14651858.CD003709.pub4  
10.1002/14651858.CD009121.pub2  
10.1002/14651858.CD011436.pub2  
10.1002/14651858.CD000521.pub3  
10.1002/14651858.CD010135.pub2  
10.1002/14651858.CD007874.pub2  
10.1002/14651858.CD003004.pub4  
10.1002/14651858.CD010570.pub2  
10.1002/14651858.CD004085.pub4  
10.1002/14651858.CD009484.pub2  
10.1002/14651858.CD007878.pub3  
10.1002/14651858.CD005144.pub3  
10.1002/14651858.CD009016.pub2  
10.1002/14651858.CD009491.pub2  
10.1002/14651858.CD007205.pub2  
10.1002/14651858.CD005576.pub3  
10.1002/14651858.CD012230  
10.1002/14651858.CD008646.pub2  
10.1002/14651858.CD006837.pub3  
10.1002/14651858.CD002787.pub3  
10.1002/14651858.CD008045.pub2

10.1002/14651858.CD011052.pub2  
10.1002/14651858.CD010726.pub2  
10.1002/14651858.CD011364.pub2  
10.1002/14651858.CD001893.pub2  
10.1002/14651858.CD003842.pub5  
10.1002/14651858.CD003587.pub3  
10.1002/14651858.CD007871.pub3  
10.1002/14651858.CD006623.pub3  
10.1002/14651858.CD006883.pub3  
10.1002/14651858.CD011812.pub2  
10.1002/14651858.CD006667.pub3  
10.1002/14651858.CD009906.pub2  
10.1002/14651858.CD008075.pub3  
10.1002/14651858.CD011833.pub2  
10.1002/14651858.CD010698.pub2  
10.1002/14651858.CD005364.pub3  
10.1002/14651858.CD011413.pub2  
10.1002/14651858.CD007272.pub2  
10.1002/14651858.CD010172.pub2  
10.1002/14651858.CD010807.pub2  
10.1002/14651858.CD007733.pub3  
10.1002/14651858.CD009761.pub2  
10.1002/14651858.CD012763  
10.1002/14651858.CD004711.pub3  
10.1002/14651858.CD004089.pub3  
10.1002/14651858.CD008674.pub2  
10.1002/14651858.CD003474.pub3  
10.1002/14651858.CD006243.pub2  
10.1002/14651858.CD007847.pub2  
10.1002/14651858.CD008926.pub2  
10.1002/14651858.CD008941.pub2  
10.1002/14651858.CD009553.pub2  
10.1002/14651858.CD007913.pub2  
10.1002/14651858.CD003721.pub3  
10.1002/14651858.CD005212.pub3  
10.1002/14651858.CD009557.pub2  
10.1002/14651858.CD000563.pub7  
10.1002/14651858.CD004253.pub4  
10.1002/14651858.CD001877.pub5  
10.1002/14651858.CD008792.pub2  
10.1002/14651858.CD004272.pub3  
10.1002/14651858.CD006242.pub2  
10.1002/14651858.CD003475.pub2

10.1002/14651858.CD009765.pub2  
10.1002/14651858.CD009206.pub2  
10.1002/14651858.CD008729.pub2  
10.1002/14651858.CD010895.pub2  
10.1002/14651858.CD001768.pub3  
10.1002/14651858.CD003139.pub3  
10.1002/14651858.CD003366.pub3  
10.1002/14651858.CD007077.pub3  
10.1002/14651858.CD003860.pub4  
10.1002/14651858.CD011093.pub2  
10.1002/14651858.CD008932.pub3  
10.1002/14651858.CD011396.pub2  
10.1002/14651858.CD005001.pub3  
10.1002/14651858.CD011652.pub2  
10.1002/14651858.CD010802.pub2  
10.1002/14651858.CD004561.pub3  
10.1002/14651858.CD003374.pub4  
10.1002/14651858.CD011152.pub2  
10.1002/14651858.CD006956.pub2  
10.1002/14651858.CD005660.pub3  
10.1002/14651858.CD007780.pub2  
10.1002/14651858.CD007886.pub2  
10.1002/14651858.CD007635.pub2  
10.1002/14651858.CD007781.pub2  
10.1002/14651858.CD008506.pub2  
10.1002/14651858.CD004320.pub3  
10.1002/14651858.CD007378.pub2  
10.1002/14651858.CD008359.pub2  
10.1002/14651858.CD005477.pub4  
10.1002/14651858.CD002199.pub4  
10.1002/14651858.CD001544.pub4  
10.1002/14651858.CD008361.pub2  
10.1002/14651858.CD003769.pub4  
10.1002/14651858.CD003144.pub2  
10.1002/14651858.CD003431.pub3  
10.1002/14651858.CD001543.pub4  
10.1002/14651858.CD008836.pub2  
10.1002/14651858.CD004078.pub2  
10.1002/14651858.CD008237.pub2  
10.1002/14651858.CD005391.pub3  
10.1002/14651858.CD008034.pub2  
10.1002/14651858.CD009350.pub2  
10.1002/14651858.CD007814.pub2

10.1002/14651858.CD004322.pub3  
10.1002/14651858.CD009092.pub2  
10.1002/14651858.CD009244.pub2  
10.1002/14651858.CD008368.pub2  
10.1002/14651858.CD008211.pub3  
10.1002/14651858.CD009475.pub2  
10.1002/14651858.CD006041.pub3  
10.1002/14651858.CD004323.pub4  
10.1002/14651858.CD009495.pub2  
10.1002/14651858.CD008879.pub2  
10.1002/14651858.CD009487.pub2  
10.1002/14651858.CD009259.pub2  
10.1002/14651858.CD010168.pub2  
10.1002/14651858.CD005200.pub3  
10.1002/14651858.CD008531.pub2  
10.1002/14651858.CD009863.pub2  
10.1002/14651858.CD006506.pub3  
10.1002/14651858.CD008593.pub3  
10.1002/14651858.CD006439.pub4  
10.1002/14651858.CD007821.pub3  
10.1002/14651858.CD001181.pub4  
10.1002/14651858.CD002200.pub3  
10.1002/14651858.CD003430.pub2  
10.1002/14651858.CD011670.pub2  
10.1002/14651858.CD010814.pub2  
10.1002/14651858.CD006875.pub3  
10.1002/14651858.CD006476.pub3  
10.1002/14651858.CD009569.pub3  
10.1002/14651858.CD009839.pub2  
10.1002/14651858.CD007047.pub2  
10.1002/14651858.CD006325.pub3  
10.1002/14651858.CD008975.pub2  
10.1002/14651858.CD008205.pub2  
10.1002/14651858.CD009160.pub2  
10.1002/14651858.CD006647.pub4  
10.1002/14651858.CD008944.pub2  
10.1002/14651858.CD010774.pub2  
10.1002/14651858.CD003298.pub3  
10.1002/14651858.CD006301.pub4  
10.1002/14651858.CD008382.pub2  
10.1002/14651858.CD008890.pub4  
10.1002/14651858.CD008796.pub3  
10.1002/14651858.CD007786.pub3

10.1002/14651858.CD010439.pub2  
10.1002/14651858.CD006247.pub3  
10.1002/14651858.CD010885.pub3  
10.1002/14651858.CD009678.pub2  
10.1002/14651858.CD008011.pub3  
10.1002/14651858.CD009219.pub4  
10.1002/14651858.CD006945.pub4  
10.1002/14651858.CD010349.pub2  
10.1002/14651858.CD010685.pub3  
10.1002/14651858.CD008483.pub2  
10.1002/14651858.CD001025.pub3  
10.1002/14651858.CD008591.pub2  
10.1002/14651858.CD004857.pub2  
10.1002/14651858.CD006528.pub2  
10.1002/14651858.CD007139.pub2  
10.1002/14651858.CD005472.pub3  
10.1002/14651858.CD007504.pub2  
10.1002/14651858.CD008937.pub2  
10.1002/14651858.CD004851.pub3  
10.1002/14651858.CD006533.pub2  
10.1002/14651858.CD006525.pub2  
10.1002/14651858.CD001760.pub2  
10.1002/14651858.CD006726.pub2  
10.1002/14651858.CD006534.pub2  
10.1002/14651858.CD002317.pub2  
10.1002/14651858.CD009138.pub2  
10.1002/14651858.CD006389.pub2  
10.1002/14651858.CD003196.pub2  
10.1002/14651858.CD008696.pub2  
10.1002/14651858.CD004185.pub3  
10.1002/14651858.CD004366.pub6  
10.1002/14651858.CD008705.pub2  
10.1002/14651858.CD008142.pub2  
10.1002/14651858.CD008704.pub2  
10.1002/14651858.CD007662.pub2  
10.1002/14651858.CD005330.pub4  
10.1002/14651858.CD003388.pub4  
10.1002/14651858.CD008851.pub2  
10.1002/14651858.CD006239.pub2  
10.1002/14651858.CD004687.pub4  
10.1002/14651858.CD002018.pub2  
10.1002/14651858.CD009083.pub2  
10.1002/14651858.CD010828.pub2

10.1002/14651858.CD006531.pub2  
10.1002/14651858.CD009317.pub2  
10.1002/14651858.CD005000.pub2  
10.1002/14651858.CD011142.pub2  
10.1002/14651858.CD004690.pub4  
10.1002/14651858.CD008324.pub3  
10.1002/14651858.CD009895.pub2  
10.1002/14651858.CD008619.pub2  
10.1002/14651858.CD010628.pub2  
10.1002/14651858.CD006833.pub2  
10.1002/14651858.CD007194.pub2  
10.1002/14651858.CD003909.pub2  
10.1002/14651858.CD007803.pub2  
10.1002/14651858.CD011777  
10.1002/14651858.CD004044.pub4  
10.1002/14651858.CD011611.pub2  
10.1002/14651858.CD011269.pub2  
10.1002/14651858.CD004692.pub4  
10.1002/14651858.CD011612.pub2  
10.1002/14651858.CD011268.pub2  
10.1002/14651858.CD012013  
10.1002/14651858.CD011565.pub2  
10.1002/14651858.CD010204.pub2  
10.1002/14651858.CD003384.pub3  
10.1002/14651858.CD006727.pub3  
10.1002/14651858.CD011119.pub2  
10.1002/14651858.CD012189  
10.1002/14651858.CD011567.pub2  
10.1002/14651858.CD010673.pub2  
10.1002/14651858.CD011170.pub2  
10.1002/14651858.CD011004.pub2  
10.1002/14651858.CD012371  
10.1002/14651858.CD011286.pub2  
10.1002/14651858.CD011520.pub2  
10.1002/14651858.CD003200.pub7  
10.1002/14651858.CD003380.pub4  
10.1002/14651858.CD003648.pub4  
10.1002/14651858.CD005143.pub3  
10.1002/14651858.CD006161.pub3  
10.1002/14651858.CD006776.pub2  
10.1002/14651858.CD007092.pub2  
10.1002/14651858.CD007617.pub2  
10.1002/14651858.CD005025.pub3

10.1002/14651858.CD007456.pub2  
10.1002/14651858.CD008273.pub2  
10.1002/14651858.CD006777.pub2  
10.1002/14651858.CD007982.pub2  
10.1002/14651858.CD007978.pub2  
10.1002/14651858.CD004811.pub3  
10.1002/14651858.CD007457.pub2  
10.1002/14651858.CD007459.pub2  
10.1002/14651858.CD001865.pub3  
10.1002/14651858.CD008722.pub2  
10.1002/14651858.CD008416.pub2  
10.1002/14651858.CD003267.pub2  
10.1002/14651858.CD009453.pub2  
10.1002/14651858.CD010038.pub2  
10.1002/14651858.CD004807.pub2  
10.1002/14651858.CD007458.pub3  
10.1002/14651858.CD009445.pub2  
10.1002/14651858.CD004134.pub3  
10.1002/14651858.CD009405.pub2  
10.1002/14651858.CD007979.pub3  
10.1002/14651858.CD003717.pub3  
10.1002/14651858.CD010232.pub2  
10.1002/14651858.CD010523.pub2  
10.1002/14651858.CD009736.pub2  
10.1002/14651858.CD010825.pub2  
10.1002/14651858.CD009727.pub2  
10.1002/14651858.CD000011.pub4  
10.1002/14651858.CD009921.pub2  
10.1002/14651858.CD001399.pub4  
10.1002/14651858.CD010790.pub2  
10.1002/14651858.CD010288.pub3  
10.1002/14651858.CD008649.pub2  
10.1002/14651858.CD000407.pub4  
10.1002/14651858.CD001917.pub4  
10.1002/14651858.CD010155.pub3  
10.1002/14651858.CD009530.pub3  
10.1002/14651858.CD001401.pub3  
10.1002/14651858.CD008185.pub4  
10.1002/14651858.CD006111.pub3  
10.1002/14651858.CD004449.pub4  
10.1002/14651858.CD011130.pub2  
10.1002/14651858.CD002201.pub5  
10.1002/14651858.CD011385.pub2

10.1002/14651858.CD009806.pub2  
10.1002/14651858.CD009354.pub4  
10.1002/14651858.CD010429.pub2  
10.1002/14651858.CD003426.pub5  
10.1002/14651858.CD001505.pub4  
10.1002/14651858.CD003149.pub3  
10.1002/14651858.CD001127.pub3  
10.1002/14651858.CD004730.pub4  
10.1002/14651858.CD010517.pub2  
10.1002/14651858.CD005599.pub5  
10.1002/14651858.CD007862.pub4  
10.1002/14651858.CD007743.pub6  
10.1002/14651858.CD011272.pub2  
10.1002/14651858.CD005405.pub4  
10.1002/14651858.CD007923.pub4  
10.1002/14651858.CD003424.pub4  
10.1002/14651858.CD007843.pub3  
10.1002/14651858.CD001915.pub5  
10.1002/14651858.CD008036.pub4  
10.1002/14651858.CD006663.pub4  
10.1002/14651858.CD004344.pub6  
10.1002/14651858.CD011175.pub2  
10.1002/14651858.CD011579.pub2  
10.1002/14651858.CD010338.pub3  
10.1002/14651858.CD005088.pub4  
10.1002/14651858.CD008227.pub3  
10.1002/14651858.CD011180.pub2  
10.1002/14651858.CD002007.pub4  
10.1002/14651858.CD008816.pub3  
10.1002/14651858.CD012040.pub2  
10.1002/14651858.CD010858.pub2  
10.1002/14651858.CD009422.pub3  
10.1002/14651858.CD003146.pub3  
10.1002/14651858.CD002009.pub6  
10.1002/14651858.CD001912.pub4  
10.1002/14651858.CD002769.pub5  
10.1002/14651858.CD011358.pub2  
10.1002/14651858.CD000406.pub5  
10.1002/14651858.CD002202.pub2  
10.1002/14651858.CD004197.pub5  
10.1002/14651858.CD006842.pub4  
10.1002/14651858.CD012380.pub2  
10.1002/14651858.CD012389.pub2



10.1002/14651858.CD006401.pub4  
10.1002/14651858.CD008482.pub5  
10.1002/14651858.CD012284.pub2  
10.1002/14651858.CD004198.pub3  
10.1002/14651858.CD011441.pub2  
10.1002/14651858.CD012330.pub2  
10.1002/14651858.CD009803.pub2  
10.1002/14651858.CD004878.pub4  
10.1002/14651858.CD004976.pub3  
10.1002/14651858.CD004877.pub3  
10.1002/14651858.CD006607.pub4  
10.1002/14651858.CD005530.pub3  
10.1002/14651858.CD002744.pub4  
10.1002/14651858.CD003645.pub3  
10.1002/14651858.CD004418.pub4  
10.1002/14651858.CD008268.pub2  
10.1002/14651858.CD004872.pub3  
10.1002/14651858.CD004879.pub4  
10.1002/14651858.CD006435.pub2  
10.1002/14651858.CD007720.pub2  
10.1002/14651858.CD001955.pub3  
10.1002/14651858.CD007368.pub2  
10.1002/14651858.CD003123.pub3  
10.1002/14651858.CD006207.pub4  
10.1002/14651858.CD004882.pub3  
10.1002/14651858.CD008395.pub2  
10.1002/14651858.CD004407.pub3  
10.1002/14651858.CD006338.pub3  
10.1002/14651858.CD004559.pub4  
10.1002/14651858.CD000422.pub3  
10.1002/14651858.CD000980.pub4  
10.1002/14651858.CD003124.pub4  
10.1002/14651858.CD000247.pub3  
10.1002/14651858.CD006602.pub4  
10.1002/14651858.CD004874.pub4  
10.1002/14651858.CD000436.pub3  
10.1002/14651858.CD007074.pub2  
10.1002/14651858.CD004823.pub4  
10.1002/14651858.CD008695.pub2  
10.1002/14651858.CD009039.pub2  
10.1002/14651858.CD007718.pub2  
10.1002/14651858.CD008008.pub2  
10.1002/14651858.CD004106.pub4

10.1002/14651858.CD007033.pub3  
10.1002/14651858.CD007695.pub3  
10.1002/14651858.CD008469.pub2  
10.1002/14651858.CD008328.pub2  
10.1002/14651858.CD003797.pub2  
10.1002/14651858.CD003533.pub2  
10.1002/14651858.CD000994.pub3  
10.1002/14651858.CD006100.pub2  
10.1002/14651858.CD003573.pub2  
10.1002/14651858.CD004357.pub4  
10.1002/14651858.CD006923.pub3  
10.1002/14651858.CD009339.pub2  
10.1002/14651858.CD002986.pub2  
10.1002/14651858.CD006829.pub2  
10.1002/14651858.CD009157.pub2  
10.1002/14651858.CD005304.pub3  
10.1002/14651858.CD009293.pub2  
10.1002/14651858.CD002991.pub3  
10.1002/14651858.CD008250.pub2  
10.1002/14651858.CD010256  
10.1002/14651858.CD002314.pub3  
10.1002/14651858.CD010257  
10.1002/14651858.CD000998.pub3  
10.1002/14651858.CD009611.pub3  
10.1002/14651858.CD010179  
10.1002/14651858.CD002742.pub2  
10.1002/14651858.CD002308.pub2  
10.1002/14651858.CD002316.pub2  
10.1002/14651858.CD004434.pub5  
10.1002/14651858.CD009296.pub2  
10.1002/14651858.CD000364.pub4  
10.1002/14651858.CD008888.pub2  
10.1002/14651858.CD010352  
10.1002/14651858.CD009305.pub2  
10.1002/14651858.CD007313.pub3  
10.1002/14651858.CD009041.pub2  
10.1002/14651858.CD006922.pub3  
10.1002/14651858.CD007891.pub3  
10.1002/14651858.CD009607.pub2  
10.1002/14651858.CD003563.pub2  
10.1002/14651858.CD002878.pub2  
10.1002/14651858.CD003792.pub2  
10.1002/14651858.CD000060.pub2

10.1002/14651858.CD006826.pub2  
10.1002/14651858.CD003002.pub3  
10.1002/14651858.CD009585.pub2  
10.1002/14651858.CD000052.pub3  
10.1002/14651858.CD001277.pub3  
10.1002/14651858.CD001116.pub4  
10.1002/14651858.CD006924.pub3  
10.1002/14651858.CD010177.pub2  
10.1002/14651858.CD009769.pub2  
10.1002/14651858.CD010391.pub2  
10.1002/14651858.CD009437.pub2  
10.1002/14651858.CD010013.pub2  
10.1002/14651858.CD009764.pub2  
10.1002/14651858.CD009019.pub2  
10.1002/14651858.CD003564.pub3  
10.1002/14651858.CD008290.pub2  
10.1002/14651858.CD007736.pub2  
10.1002/14651858.CD003794.pub4  
10.1002/14651858.CD003559.pub4  
10.1002/14651858.CD009910.pub2  
10.1002/14651858.CD003137.pub5  
10.1002/14651858.CD008231.pub3  
10.1002/14651858.CD008806.pub2  
10.1002/14651858.CD006089.pub4  
10.1002/14651858.CD008800.pub2  
10.1002/14651858.CD006458.pub3  
10.1002/14651858.CD010277.pub2  
10.1002/14651858.CD001477.pub4  
10.1002/14651858.CD005532.pub3  
10.1002/14651858.CD006323.pub3  
10.1002/14651858.CD006619.pub3  
10.1002/14651858.CD004785.pub5  
10.1002/14651858.CD003699.pub4  
10.1002/14651858.CD000023.pub4  
10.1002/14651858.CD005149.pub4  
10.1002/14651858.CD006822.pub4  
10.1002/14651858.CD009119.pub2  
10.1002/14651858.CD004975.pub3  
10.1002/14651858.CD009609.pub2  
10.1002/14651858.CD006088.pub4  
10.1002/14651858.CD008115.pub3  
10.1002/14651858.CD000530.pub3  
10.1002/14651858.CD001480.pub4

10.1002/14651858.CD010056.pub2  
10.1002/14651858.CD001266.pub4  
10.1002/14651858.CD001269.pub5  
10.1002/14651858.CD006452.pub4  
10.1002/14651858.CD001833.pub3  
10.1002/14651858.CD006639.pub4  
10.1002/14651858.CD001478.pub6  
10.1002/14651858.CD003257.pub5  
10.1002/14651858.CD008965.pub4  
10.1002/14651858.CD005189.pub4  
10.1002/14651858.CD009066.pub2  
10.1002/14651858.CD005188.pub3  
10.1002/14651858.CD002109.pub4  
10.1002/14651858.CD006482.pub4  
10.1002/14651858.CD006206.pub4  
10.1002/14651858.CD010130.pub2  
10.1002/14651858.CD001831.pub5  
10.1002/14651858.CD010473.pub2  
10.1002/14651858.CD005975.pub3  
10.1002/14651858.CD004875.pub5  
10.1002/14651858.CD002745.pub4  
10.1002/14651858.CD001957.pub6  
10.1002/14651858.CD009088.pub3  
10.1002/14651858.CD007094.pub4  
10.1002/14651858.CD001954.pub4  
10.1002/14651858.CD007716.pub4  
10.1002/14651858.CD006895.pub3  
10.1002/14651858.CD010636.pub2  
10.1002/14651858.CD006821.pub3  
10.1002/14651858.CD007897.pub3  
10.1002/14651858.CD004884.pub4  
10.1002/14651858.CD004783.pub5  
10.1002/14651858.CD009194.pub3  
10.1002/14651858.CD010596.pub2  
10.1002/14651858.CD000219.pub4  
10.1002/14651858.CD007577.pub3  
10.1002/14651858.CD010586.pub2  
10.1002/14651858.CD006915.pub3  
10.1002/14651858.CD001726.pub5  
10.1002/14651858.CD004405.pub5  
10.1002/14651858.CD006362.pub4  
10.1002/14651858.CD008116.pub3  
10.1002/14651858.CD004402.pub3

10.1002/14651858.CD011530.pub2  
10.1002/14651858.CD010907.pub2  
10.1002/14651858.CD009345.pub2  
10.1002/14651858.CD007880.pub3  
10.1002/14651858.CD009946.pub2  
10.1002/14651858.CD008858.pub3  
10.1002/14651858.CD004873.pub5  
10.1002/14651858.CD005187.pub5  
10.1002/14651858.CD007719.pub4  
10.1002/14651858.CD011857.pub2  
10.1002/14651858.CD007095.pub3  
10.1002/14651858.CD004406.pub4  
10.1002/14651858.CD004786.pub5  
10.1002/14651858.CD009612.pub2  
10.1002/14651858.CD005978.pub3  
10.1002/14651858.CD011487.pub2  
10.1002/14651858.CD011360.pub2  
10.1002/14651858.CD004267.pub4  
10.1002/14651858.CD011534.pub2  
10.1002/14651858.CD010010.pub3  
10.1002/14651858.CD005437.pub4  
10.1002/14651858.CD010651.pub2  
10.1002/14651858.CD002190.pub5  
10.1002/14651858.CD011177.pub3  
10.1002/14651858.CD000245.pub4  
10.1002/14651858.CD004417.pub5  
10.1002/14651858.CD010115.pub2  
10.1002/14651858.CD001289.pub2  
10.1002/14651858.CD002990.pub3  
10.1002/14651858.CD010844.pub2  
10.1002/14651858.CD010327.pub2  
10.1002/14651858.CD002996.pub3  
10.1002/14651858.CD007676.pub2  
10.1002/14651858.CD000238.pub2  
10.1002/14651858.CD010909.pub2  
10.1002/14651858.CD007714.pub2  
10.1002/14651858.CD010749.pub2  
10.1002/14651858.CD010456.pub2  
10.1002/14651858.CD006595.pub3  
10.1002/14651858.CD009471.pub2  
10.1002/14651858.CD009878.pub2  
10.1002/14651858.CD010283.pub2  
10.1002/14651858.CD001288.pub4

10.1002/14651858.CD009285.pub3  
10.1002/14651858.CD010509.pub2  
10.1002/14651858.CD006322.pub3  
10.1002/14651858.CD006897.pub3  
10.1002/14651858.CD010382.pub2  
10.1002/14651858.CD010139.pub2  
10.1002/14651858.CD011306.pub2  
10.1002/14651858.CD011438.pub2  
10.1002/14651858.CD003793.pub3  
10.1002/14651858.CD011090.pub2  
10.1002/14651858.CD011437.pub2  
10.1002/14651858.CD011032.pub2  
10.1002/14651858.CD001287.pub5  
10.1002/14651858.CD009552.pub3  
10.1002/14651858.CD010066.pub2  
10.1002/14651858.CD011397.pub2  
10.1002/14651858.CD002997.pub4  
10.1002/14651858.CD011293.pub2  
10.1002/14651858.CD001392.pub3  
10.1002/14651858.CD008351.pub3  
10.1002/14651858.CD008989.pub3  
10.1002/14651858.CD007949.pub2  
10.1002/14651858.CD007525.pub3  
10.1002/14651858.CD011721.pub2  
10.1002/14651858.CD008202.pub2  
10.1002/14651858.CD011017.pub2  
10.1002/14651858.CD011715.pub2  
10.1002/14651858.CD011050.pub2  
10.1002/14651858.CD010346.pub2  
10.1002/14651858.CD011801.pub2  
10.1002/14651858.CD011716.pub2  
10.1002/14651858.CD009953.pub2  
10.1002/14651858.CD007524.pub4  
10.1002/14651858.CD011205.pub2  
10.1002/14651858.CD008532.pub3  
10.1002/14651858.CD011714.pub2  
10.1002/14651858.CD011826.pub2  
10.1002/14651858.CD010744.pub2  
10.1002/14651858.CD007851.pub3  
10.1002/14651858.CD011440.pub2  
10.1002/14651858.CD011511.pub2  
10.1002/14651858.CD012067.pub2  
10.1002/14651858.CD011818.pub2

10.1002/14651858.CD010758.pub2  
10.1002/14651858.CD011439.pub2  
10.1002/14651858.CD001001.pub3  
10.1002/14651858.CD011434.pub2  
10.1002/14651858.CD005305.pub4  
10.1002/14651858.CD006429.pub3  
10.1002/14651858.CD005074.pub4  
10.1002/14651858.CD011285.pub2  
10.1002/14651858.CD001284.pub2  
10.1002/14651858.CD001390.pub4  
10.1002/14651858.CD011802.pub2  
10.1002/14651858.CD012066.pub2  
10.1002/14651858.CD012286.pub2  
10.1002/14651858.CD012158.pub2  
10.1002/14651858.CD012255.pub2  
10.1002/14651858.CD012331.pub2  
10.1002/14651858.CD011425.pub2  
10.1002/14651858.CD011859.pub2  
10.1002/14651858.CD009834.pub3  
10.1002/14651858.CD011897.pub2  
10.1002/14651858.CD010347.pub2  
10.1002/14651858.CD005603.pub3  
10.1002/14651858.CD006580.pub5  
10.1002/14651858.CD011682.pub2  
10.1002/14651858.CD012226.pub2  
10.1002/14651858.CD011699.pub2  
10.1002/14651858.CD010834.pub3  
10.1002/14651858.CD005959.pub2  
10.1002/14651858.CD008471.pub2  
10.1002/14651858.CD008130.pub2  
10.1002/14651858.CD001704.pub4  
10.1002/14651858.CD001250.pub2  
10.1002/14651858.CD004577.pub3  
10.1002/14651858.CD004124.pub3  
10.1002/14651858.CD001256.pub2  
10.1002/14651858.CD005960.pub2  
10.1002/14651858.CD000168.pub3  
10.1002/14651858.CD008241.pub2  
10.1002/14651858.CD007908.pub2  
10.1002/14651858.CD009496.pub2  
10.1002/14651858.CD000523.pub4  
10.1002/14651858.CD008262.pub2  
10.1002/14651858.CD004963.pub3

10.1002/14651858.CD008470.pub2  
10.1002/14651858.CD005595.pub3  
10.1002/14651858.CD004575.pub3  
10.1002/14651858.CD008628.pub2  
10.1002/14651858.CD009030.pub2  
10.1002/14651858.CD009890.pub2  
10.1002/14651858.CD008413.pub2  
10.1002/14651858.CD005465.pub3  
10.1002/14651858.CD009073.pub2  
10.1002/14651858.CD005079.pub3  
10.1002/14651858.CD009363.pub2  
10.1002/14651858.CD008987.pub2  
10.1002/14651858.CD000339.pub3  
10.1002/14651858.CD009587.pub2  
10.1002/14651858.CD001255.pub5  
10.1002/14651858.CD004439.pub3  
10.1002/14651858.CD009808.pub2  
10.1002/14651858.CD004962.pub3  
10.1002/14651858.CD010071.pub3  
10.1002/14651858.CD007146.pub3  
10.1002/14651858.CD000227.pub4  
10.1002/14651858.CD009065.pub2  
10.1002/14651858.CD007601.pub4  
10.1002/14651858.CD008579.pub3  
10.1002/14651858.CD008887.pub2  
10.1002/14651858.CD008129.pub2  
10.1002/14651858.CD009949.pub2  
10.1002/14651858.CD009076.pub2  
10.1002/14651858.CD004961.pub4  
10.1002/14651858.CD010144.pub2  
10.1002/14651858.CD008106.pub3  
10.1002/14651858.CD009651.pub2  
10.1002/14651858.CD010960.pub2  
10.1002/14651858.CD010261.pub2  
10.1002/14651858.CD009699.pub2  
10.1002/14651858.CD009848.pub2  
10.1002/14651858.CD007789.pub2  
10.1002/14651858.CD010606.pub2  
10.1002/14651858.CD010836.pub2  
10.1002/14651858.CD003324.pub3  
10.1002/14651858.CD000434.pub4  
10.1002/14651858.CD009679.pub2  
10.1002/14651858.CD010789.pub2



10.1002/14651858.CD007428.pub3  
10.1002/14651858.CD010675.pub2  
10.1002/14651858.CD011166.pub2  
10.1002/14651858.CD010847.pub3  
10.1002/14651858.CD007121.pub4  
10.1002/14651858.CD001880.pub6  
10.1002/14651858.CD007759.pub4  
10.1002/14651858.CD009348.pub2  
10.1002/14651858.CD010467.pub2  
10.1002/14651858.CD008875.pub2  
10.1002/14651858.CD011387.pub2  
10.1002/14651858.CD010134.pub2  
10.1002/14651858.CD010358.pub2  
10.1002/14651858.CD010959.pub2  
10.1002/14651858.CD001159.pub2  
10.1002/14651858.CD011136.pub2  
10.1002/14651858.CD009026.pub2  
10.1002/14651858.CD007837.pub2  
10.1002/14651858.CD009237.pub2  
10.1002/14651858.CD010265.pub2  
10.1002/14651858.CD006850.pub3  
10.1002/14651858.CD010969.pub2  
10.1002/14651858.CD012382  
10.1002/14651858.CD008930.pub2  
10.1002/14651858.CD001689.pub3  
10.1002/14651858.CD001781.pub3  
10.1002/14651858.CD001431.pub5
